# SUBJECT INDEX

## A

**Abdominal surgery, *See under* Surgery**

**Accidents, *See under* Complications**

**Acebutolol, *See under* Pharmacology**

**Acetylcholine**

ion channels activated by, edrophonium alters properties of [Wachtel], A339

ion channels activated by, halothane and isoflurane effects on [Sokoll & Davies], A410

peripheral airway responses to [Lindeman, Freed & Hirshman], A545

readily releasable stores of, depletion of [Foldes, Chaudhry, Kinjo & Nagashima], A338

synaptic vesicle uptake of, inhibition of, by vesamicol [Nagashima, Kinjo, Chaudhry & Foldes], A337

**Acid-base equilibrium**

**acidosis**

lactic, role in neuronal tissue damage inflicted by hypoxia in vitro [Rigor, Dong, Brahen, West & Schurr], A322

neonatal, at cesarean section, influence of crystalloid solution choice on [Norris, Leighton, DeSimone, Goodman & Gorman], A458

**pH**

change in, and combined epidural narcotic-local anesthetic synergism [Bagley, Rice & Broadman], A278

effects on oxidation rate of epinephrine [Parnass, Baughman, Miletich & Albrecht], A280

lidocaine solutions adjusted for, effects on compound action potential in intact rat sciatic nerves [Okamura, Reisner & Kalichman], A281

peripheral venous, similarities to arterial blood gases, in anesthetized children [Jordan & Jordan], A528

solutions adjusted for, chemical stability of bupivacaine and epinephrine in [Bonhomme, Benhamou, Martre & Preaux], A279

**Acidosis, *See under* Acid-base equilibrium**

**Acupuncture**

role in treatment of postoperative nausea and vomiting [Dundee, Fitzpatrick & Ghaly], A165

**Acute respiratory failure, *See* Lung, respiratory distress syndrome**

**Adenosine, *See under* Pharmacology**

**Adenosine monophosphate, *See under* Metabolism**

**Adenosine triphosphate, *See under* Metabolism**

**ADH, *See* Hormones, antidiuretic**

**Adrenal medulla, *See under* Sympathetic nervous system**

**Age factors, *See also* Anesthesia, geriatric; Anesthesia, pediatric; Biotransformation (drug); Potency, anesthetic; Surgery, pediatric**

and apneic threshold in lambs [Kurth, Hutchinson, Davenport & Caton], A520

cerebral and myocardial blood flow response to increasing doses of epinephrine during cardiopulmonary resuscitation in infant

swine [Berkowitz, Koehler, Schleien, Dean, Gervais, Michael, Rogers & Traystman], A649

and cerebral blood flow autoregulation during hypothermic cardiopulmonary bypass [Brusino, Reves, Prough, Stump & Croughwell], A10

effects of halothane on function of sarcoplasmic reticulum in skinned myocardial fibers of newborn and adult rabbit [Krane & Su], A93

enflurane and mechanical properties of rat heart muscle during maturation [Shimosato, Mizukawa, Tinker, Ross & Kayaba], A97

and hemodynamic and pharmacokinetic effects of alfentanil in piglet [Davis, Stiller, Cook, Ingram & Roeber], A505

and induction dose of thiopental [Dundee, Milligan & Furness], A662

interaction of fentanyl and pentobarbital on cerebral and peripheral hemodynamics in newborn lambs [Yaster, Koehler & Traystman], A516

and intravascular mixing during induction with thiopental [Henthorn, Krejcie & Avram], A663

and metocurine pharmacokinetics and pharmacodynamics [Weinstein, Matteo, Ornstein, Goldstoft & Diaz], A615

and myocardial depressant effects of isoflurane vs. halothane in feline papillary muscle function [Wolf, Neal & Mathew], A504

neurological outcome in aged rats following regional cerebral ischemia [Hoffman, Baughman, Miletich & Albrecht], A428

and plasma protein binding of sufentanil [Meistelman, Benhamou, Mahe, Levron, Mazoit, Ecoffey & Truffa-Bachi], A518

thiopental kinetics and, reassessment of [Krejcie, Henthorn, Avram & Morton], A664

**Air embolism, *See under* Embolism**

**Airway**

closure, in anesthetized children [Jonmarker, Larsson & Werner], A488

**resistance**

mechanism of action of glucocorticoids on [Darowski, Hannon, Rennie & Hirshman], A546

responses to histamine and acetylcholine [Lindeman, Freed & Hirshman], A545

**Airway pressure, *See under* Ventilation**

**Albumin, *See under* Protein**

**Alcohol**

secondary stereoisomers of, anesthetic and lipid disordering potencies of [Firestone, Alifimoff & Miller], A380

usage of, effect on induction dose of thiopental of [Milligan, Dundee & Furness], A397

**Alfentanil, *See under* Analgesics, narcotic; Anesthetics, intravenous**

**Alinidine, *See under* Pharmacology**

**Almitrine bismesylate, *See under* Pharmacology**

**Alpha-adrenergic receptors, *See under* Sympathetic nervous system**

**Alveolar ventilation, *See under* Ventilation**

**American Society of Anesthesiologists, *See under* Organizations**

**Aminoglycosides, *See under* Pharmacology**

AMP, *See* Metabolism, adenosine monophosphate

Amrinone, *See under* Pharmacology

# Analgesia

bilateral, after unilateral intercostal nerve block [Kuhlman, Ahmad, Cauquil, Roche & Edouard], A284

effects of eutectic mixture of local anesthetics vs. intradermal lidocaine infiltration prior to venous cannulation in children [Soliman, Broadman, Hannallah & McGill], A513

intrapleural administration of lidocaine for treatment of posttraumatic thoracic pain [Carli, Mazoit, Zetlaoui & Lambert], A241

during labor, evaluation of epidural pH-adjusted 2% 2-chloroprocaine for [Ross, Hughes, Glosten, Shnider, Preston, Rosen & Dailey], A629

## measurement

qualitative comparison of pain with McGill Pain Questionnaire using meperidine, morphine, and oxymorphone in patient-controlled analgesia [Parker, Sinatra & Harrison], A239

## postoperative

in abdominal aortic aneurysms, continuous lumbar epidural fentanyl for [Bell, Levette & Larijani], A234

axillary plexus block-proximal catheter technique for [Gaumann, Lennon & Wedel], A242

caudal, pediatric, minimum effective concentration of bupivacaine for [Wolf, Valley, Fear, Roy & Lerman], A509

caudal, pediatric, morphine [Rosen, Rosen & Bank], A510

after cesarean section, improved, epidural fentanyl/morphine combination for [Kotelko, Rottman, Wright, Stone, Rosenblatt & Yamashiro], A622

after cesarean section, safety and efficacy of epidural butorphanol for, in regular clinical setting [Tan, Bresson, Brockmann & Brauer], A623

continuous epidural sufentanil infusion for [Cheng, Koeber, Hopwood, Stommel, Roerhig & Kay], A233

epidural butorphanol for [Karth, Velamati, Penas, Aravapalli & Lavine], A235

following cesarean delivery, epidural butorphanol/fentanyl for [Naulty, LaBove, Datta, Hunt & Ostheimer], A463

following cesarean delivery, mini-dose intrathecal morphine for [Abboud, Dror, Mosaad, Zhu, Gangolly, Mantilla, Swart, Silao, Makar, Moore, Davis & Lee], A464

microdose intrathecal clonidine and morphine for [Coombs, Jensen & Murphy], A238

patient-controlled, intravenous vs. epidural fentanyl for [Estok, Glass, Goldberg, Freiberg & Sladen], A230

patient-controlled, intravenous vs. subcutaneous hydromorphone for [Urquhart, Klapp & White], A231

patient-controlled, qualitative comparison of pain with McGill Pain Questionnaire using meperidine, morphine, and oxymorphone in [Parker, Sinatra & Harrison], A239

potency of epidural fentanyl and alfentanil [Chrubasik, Wust, Schulte-Monting, Thon & Zindler], A236

prevention of respiratory depression from epidural morphine in post-thoracotomy patients with nalbuphine hydrochloride [Doran, Baxter, Samson, Penning & Dube], A248

relationship between efficacy of pain relief and oscillatory nature of pain using patient-controlled analgesia [Ferrante, Rocco, Orav & Gallo], A232

subarachnoid fentanyl for [Bohannon & Estes], A237

# Analgesics, narcotic, *See also* Pain

## alfentanil

epidural, postoperative, analgesic potency of [Chrubasik, Wust, Schulte-Monting, Thon & Zindler], A236

perioperative, effect on postoperative gastric emptying of [Howe, Milligan, McClean & Dundee], A164

## buprenorphine

and fentanyl, intrathecal, in dog, urodynamic studies after [Drenger, Pikarsky & Magora], A240

## butorphanol

epidural, for postoperative analgesia [Karth, Velamati, Penas, Aravapalli & Lavine], A235

epidural, safety and efficacy of, in post-cesarean patients in regular clinical setting [Tan, Bresson, Brockmann & Brauer], A623

fentanyl and, epidural, for post-cesarean delivery analgesia [Naulty, LaBove, Datta, Hunt & Ostheimer], A463

nalbuphine vs., in awake dogs, fourth ventricular administration of, reversal of morphine-induced respiratory depression during [VadeBoncouer, Pelligrino & Albrecht], A542

ventilatory sensitivity to hypoxia after administration of [Camporesi, Glass, Moon, Steinhilber & Wagoner], A541

BW B1090U infusion requirements in adults during anesthesia with [Powers, Weber, Brandom, Byers, Simpson, Sarnier, Woelfel, Cook, McNulty & Foster], A359

## fentanyl

bupivacaine and, epidural, epinephrine effect on duration and analgesia with [Grice, Eisenach, Dewan & Weiner], A440

bupivacaine and, subarachnoid, perioperative analgesia with [Hunt, Datta, Hauch, Ostheimer, Herwig & Naulty], A621

and buprenorphine, intrathecal, in dog, urodynamic studies after [Drenger, Pikarsky & Magora], A240

butorphanol and, epidural, for post-cesarean delivery analgesia [Naulty, LaBove, Datta, Hunt & Ostheimer], A463

combined with morphine, epidural, improved surgical and post-cesarean analgesia with [Kotelko, Rottman, Wright, Stone, Rosenblatt & Yamashiro], A622

effects on systemic hemodynamics and plasma concentrations of histamine, catecholamines, and immunoreactive beta endorphin [Fahmy, Bottros, Charchaffieh, Sunder & Carr], A395

epidural, during labor, maternal administration of, neonatal neurobehavioral effects followig [Capogna, Celleno, McGannon, Richardson & Kennedy], A461

epidural, effect of diluent volume on analgesia produced by [Arcario, Vartikar, Johnson, Lema, Datta, Ostheimer & Naulty], A441

epidural, lidocaine with, for cesarean section [Preston, Rosen, Daniels, Glosten, Shnider, Ross, Dailey & Hughes], A442

epidural, postoperative, analgesic potency of [Chrubasik, Wust, Schulte-Monting, Thon & Zindler], A236

epidural bupivacaine and, for extracorporeal shock wave lithotripsy [Bromage, Al-Faqih, Kadiwal & Tamilasan], A226

epidural continuous infusion during labor, 0.0002% with 0.0625% bupivacaine, vs. 0.125% bupivacaine [Chestnut, Owen, Ostman, Bates & Choi], A443

intravenous vs. epidural, in postoperative patient [Estok, Glass, Goldberg, Freiberg & Sladen], A230

local anesthetic synergism with, does pH change contribute to [Bagley, Rice & Broadman], A278

oral, transmucosal, premedication with, effects on gastric volume and acidity in children on [Leiman, Walford, Rawal, Katz, Marcus, van Nieuwenhuyzen, Cronau & Stanley], A489

oral, transmucosal, premedication with, vs. oral solution of meperidine, diazepam, and atropine, in children [Nelson, Streisand, Mulder, East & Stanley], A490

perioperative, effect on postoperative gastric emptying of [Howe, Milligan, McClean & Dundee], A164

subarachnoid, for postoperative analgesia [Bohannon & Estes], A237

**hydromorphone**

intravenous vs. subcutaneous, for patient controlled anesthesia [Urquhart, Klapp & White], A231

**ketamine**

in morphine tolerant mice [Finck, Samaniego & Ngai], A396

**meperidine**

compared with morphine and oxymorphone for use in patient controlled analgesia following cesarean delivery [Harrison, Sinatra, Lodge, Sibert & Parker], A462

intrathecal, tetracaine vs., for elective cesarean section [Talafer, Jacquinet, Legagneux, Jasson & Conseiller], A620

morphine, oxymorphone and, qualitative comparison of pain with McGill Pain Questionnaire using, in patient-controlled analgesia [Parker, Sinatra & Harrison], A239

oral solution with diazepam and atropine, oral transmucosal fentanyl citrate vs., for premedication in children [Nelson, Streisand, Mulder, East & Stanley], A490

**methadone**

epidural bupivacaine and, for extracorporeal shock wave lithotripsy [Drenger, Shir, Magora & Davidson], A217

pharmacokinetics of, in children and adolescents, in perioperative period [Berde, Sethna, Holzman, Reidy & Gondek], A519

**morphine**

biphasic effects of, on fetal breathing movements [Szeto, Zhu, Umans & Dwyer], A457

combined with fentanyl, epidural, improved surgical and post-cesarean analgesia with [Kotelko, Rottman, Wright, Stone, Rosenblatt & Yamashiro], A622

compared with meperidine and oxymorphone for use in patient controlled analgesia following cesarean delivery [Harrison, Sinatra, Lodge, Sibert & Parker], A462

distribution following lumbar epidural administration in rabbits [Wang, Hiller, Holland, Simon, Hillman & Turndorf], A253

does clonidine potentiate [Sperry, DiFazio & Moscicki], A391

effect of premedication on preoperative arterial oxygen saturation in children with congenital heart disease [De Bock, Petrilli, Davis & Motoyama], A492

enhanced cardiovascular effects of, during hypothermia [Puig, Bansinath, Vargas, Lovitz & Turndorf], A312

epidural, following cesarean delivery, quality of, as affected by volume of injectant [Phan, Azar, Osborn, Lobo & Lear], A285

epidural, release of  $\beta$ -endorphin and antidiuretic hormone by [Donnenfeld, Ramanathan, Parker, Vargas & Turndorf], A446

epidural, respiratory depression from, in post-thoracotomy patients, prevention with nalbuphine hydrochloride of [Doran, Baxter, Samson, Penning & Dube], A248

epidural, systemic histamine release by [Korsh, Ramanathan, Parker & Turndorf], A445

halothane and, synergistic interaction of, in vitro [Puig, Warner, Tang, Lovitz & Turndorf], A411

injections in cisterna magna for intractable pain in cancer patients [Schoeffler, Haberer, Monteillard & Bouetard], A246

intrathecal, bupivacaine combined with, for cesarean section [Abouleish, Rawal, Fallon & Hernandez], A619

intrathecal, mini-dose, for relief of post-cesarean section pain [Abboud, Dror, Mosad, Zhu, Gangolly, Mantilla, Swart, Silao, Makar, Moore, Davis & Lee], A464

intrathecal, perioperative hemodynamic effects of [Chester, Schubert, Brandon, Pudimat & Pray], A267

isoflurane MAC-awake not affected by analgesic doses of [Gross & Alexander], A375

meperidine, oxymorphone and, qualitative comparison of pain

with McGill Pain Questionnaire using, in patient-controlled analgesia [Parker, Sinatra & Harrison], A239

M-3-glucuronidation of, halothane anesthesia has no effect on [Merrell, Wood, Jackson, Shay & Wood], A295

mice tolerant to, ketamine analgesia in [Finck, Samaniego & Ngai], A396

microdose intrathecal clonidine and and, for postoperative analgesia [Coombs, Jensen & Murphy], A238

pharmacodynamics in rat spinal cord following intrathecal administration [Nishio, Kitabata, Murata, Sinatra & Collins], A394

premedication with, effect on continuous oxygen saturation in cardiac patient prior to transport to operating room [Hensley Jr., Dodson, Larach, Martin & High], A4

respiratory depression induced by, reversal of, during fourth ventricular administration of butorphanol or nalbuphine in awake dogs [VadeBoncouer, Pelligrino & Albrecht], A542

spinal, inhibition of micturition reflex in unanesthetized rats with, drug effects on urinary bladder tone during [Durant & Yaksh], A675

substance P release from cultured dorsal root ganglia inhibited by [Chang, Berde, Holz, Steward & Kream], A388

ventilatory sensitivity to hypoxia after administration of [Camporesi, Glass, Moon, Steinhaus & Wagoner], A541

**nalbuphine**

butorphanol vs., in awake dogs, fourth ventricular administration of, reversal of morphine-induced respiratory depression during [VadeBoncouer, Pelligrino & Albrecht], A542

intrathecal, failure of, to suppress visceral pain in pregnant rats [Marando, Sinatra, Fu & Collins], A447

prevention of respiratory depression from epidural morphine in post-thoracotomy patients with [Doran, Baxter, Samson, Penning & Dube], A248

nitrous oxide and, neuromuscular effects of BW B1090U in patients under anesthesia with [Choi, Mehta, Murray, Forbes, Sokoll, Gergis, Krol, Abou-Donia & Cotten], A355

nitrous oxide and, neuromuscular effects of BW B1090U in patients under anesthesia with [Lee, Cheng, Yang, Cantley, Harris, Weakly & Whitehead], A354

**oxymorphone**

compared with meperidine and morphine for use in patient controlled analgesia following cesarean delivery [Harrison, Sinatra, Lodge, Sibert & Parker], A462

effects on systemic hemodynamics and plasma concentrations of histamine, catecholamines, and immunoreactive beta endorphin [Fahmy, Bottros, Charchafieh, Sunder & Carr], A395

meperidine, morphine and, qualitative comparison of pain with McGill Pain Questionnaire using, in patient-controlled analgesia [Parker, Sinatra & Harrison], A239

**pentazocine**

catecholamine efflux from perfused dog adrenals induced by [Fukumitsu, Sumikawa, Kinouchi & Yoshiya], A387

**RX77989**

a new potent analgesic [Glass, Shafron, Camporesi, Reves, Gustafson, Spaulding & Quill], A244

**spirodoline**

epidural, analgesia and ventilatory characteristics of [Lander, Hayworth, Moscicki & DiFazio], A243

**sufentanil**

continuous epidural infusion for postoperative analgesia [Cheng, Koeber, Hopwood, Stommel, Roerhig & Kay], A233

effect on ventilatory responses to hypercapnia and hypoxia during isoflurane anesthesia in dogs [Abdul-Rasool, Aqleh, Jenkins, Valcke & Ward], A539

- epidural, effect of, on temperature regulation in parturient [Johnson, Sevarino, Lema, Datta, Ostheimer & Naulty], A450
- epidural, in children, analgesia and ventilatory response to CO<sub>2</sub> following [Benlabeled, Ecoffey, Levron, Flaisler & Gross], A517
- local anesthetic synergism with, does pH change contribute to [Bagley, Rice & Broadman], A278
- nasally administered, preinduction of anesthesia in pediatric patients with [Henderson, Brodsky, Fisher, Brett & Hertzka], A495
- substance P release from cultured dorsal root ganglia inhibited by [Chang, Berde, Holz, Steward & Kream], A388
- Anatomy**
- peridural space**
- variations of L<sub>5</sub>-S<sub>1</sub> interlaminar space in scoliosis, best approach from convex side [Barrios-Alarcon, Aldrete & Cedrola], A266
- subarachnoid space**
- variations of L<sub>5</sub>-S<sub>1</sub> interlaminar space in scoliosis, best approach from convex side [Barrios-Alarcon, Aldrete & Cedrola], A266
- Anesthesia**
- cardiovascular**
- bubble oxygenator, uptake and elimination via [Nussmeier, Moskowitz, Weiskopf, Cohen & Eger II], A197
- effect of congenital heart disease on pharmacokinetics of intravenous lidocaine in pediatrics [LeDez, Strong, Reider, Burrows & Lerman], A71
- etomidate vs. thiopental for elective cardioversion [Ford, Maze & Gaba], A143
- sufentanil or ketamine, induction in cardiomyopathy patients [Gutzke, Shah, Glisson, Griesemer & Rao], A64
- depth**
- lower esophageal contractility and [Hein & Whitaker], A645
- lower esophageal contractility and, clinical signs of light anesthesia and [Aitkenhead, Lin & Thomas], A671
- lower esophageal contractility and, controlled trial of efficacy of measure of [Erickson, Foss & Kuni], A672
- lower esophageal contractility and, during open heart surgery [Silvay, Grossbarth, Erickson, Kuni & Kaplan], A644
- general**
- craniotomy under, hemodynamic response to, effect of bupivacaine scalp infiltration on [Rung, Hillman, Thompson & Davis], A432
- goats under, graded incomplete ischemia in, relationship between cerebral blood flow and somatosensory evoked potentials during [Kochs & Schulte am Esch], A403
- hemodynamic effects of extubation in postoperative critical care patients [Russell, Kofke, High & Snider], A131
- lymph flow rate reduced by [Allen, Drake, Gabel & Laine], A137
- serum creatinine concentration and clearance during whole body hyperthermia ( $\geq 41.5^{\circ}\text{C}$ ) under [Cronau Jr., Mansfield & Bull], A306
- geriatric**
- comparison of sufentanil and fentanyl with N<sub>2</sub>O halothane anesthesia for total hip arthroplasty [Gauzit, Marty, Couderc, Bouyet, Flaischler & Desmonts], A120
- dose-response evaluation of pipecuronium bromide in [Azad, Goldberg, Larjani, Ritter, Marr, Beach & Seltzer], A370
- influence of pharmacokinetic alterations of benzodiazepines used for anesthesia on residual sedation in [Servin, Luscombe, Farinotti & Desmonts], A656
- pharmacokinetics and pharmacodynamics of atracurium in [deBros, Okutani, Lai, Lawrence & Basta], A604
- response times to neostigmine and pyridostigmine in [Young, Matteo & Ornstein], A340
- sufentanil pharmacokinetics in [Spielvogel, Caron, Levron & Lienhart], A389
- neurosurgical**
- effect of bupivacaine scalp infiltration on hemodynamic response to craniotomy under general anesthesia [Rung, Hillman, Thompson & Davis], A432
- electrocardiographic changes following [Morales Jr., Shapiro, Donegan, Bird, Huycke, Rupp, Wickersham & Rampil], A65
- obstetric**
- cesarean section**
- combined intrathecal morphine and bupivacaine for [Abouleish, Rawal, Fallon & Hernandez], A619
- comparison of meperidine, morphine, and oxymorphone for use in patient controlled analgesia following [Harrison, Sinatra, Lodge, Sibert & Parker], A462
- elective, intrathecal meperidine vs. tetracaine for [Talafré, Jacquinet, Legagneux, Jasson & Conseiller], A620
- epidural bupivacaine/fentanyl for analgesia following [Naulty, LaBove, Datta, Hunt & Ostheimer], A463
- epidural fentanyl with lidocaine for [Preston, Rosen, Daniels, Glosten, Shnider, Ross, Dailey & Hughes], A442
- epidural ketamine improves epidural lidocaine anesthesia during [Peng, Shulman, Blancato, Cutrone & Nyunt], A624
- evaluation of vecuronium for rapid sequence induction in patients undergoing [Tessmer, Johnson, Skjonsby, Kubicek & Joyce], A452
- improved analgesia for, with epidural fentanyl/morphine combination [Kotelko, Rottman, Wright, Stone, Rosenblatt & Yamashiro], A622
- influence of choice of crystalloid solution on neonatal acid-base status at [Norris, Leighton, DeSimone, Goodman & Gorman], A458
- pain following, mini-dose intrathecal morphine for relief of [Abboud, Dror, Mosaad, Zhu, Gangolly, Mantilla, Swart, Silao, Makar, Moore, Davis & Lee], A464
- perioperative analgesia with subarachnoid fentanyl-bupivacaine for [Hunt, Datta, Hauch, Ostheimer, Herwig & Naulty], A621
- placental transfer and neonatal effects of propofol administered during [Dailland, Lirzin, Cockshott, Jorrot & Coonseiller], A454
- quality of epidural morphine analgesia following, as affected by volume of injectant [Phan, Azar, Osborn, Lobo & Lear], A285
- safety and efficacy of epidural butorphanol for patients following, in regular clinical setting [Tan, Bresson, Brockmann & Brauer], A623
- chronotropic effect of isoproterenol reduction in pregnant women [DeSimone, Leighton, Norris, Chayen & Menduke], A460
- effect of epidural sufentanil on temperature regulation in parturient [Johnson, Sevarino, Lema, Datta, Ostheimer & Naulty], A450
- epidural, in parturient, safety and efficacy of 2% bisulfite-free chloroprocaine with and without epinephrine for [Abboud, Mosaad, Makar, Gangolly, Dror, Zhu, Mantilla, Davis, Moore & Swart], A631
- epidural anesthesia with pH-adjusted 3% 2-chloroprocaine for postpartum tubal ligation [Glosten, Dailey, Preston, Shnider, Ross, Rosen & Hughes], A630

- epidural test dose reconsidered [Baker, Longmire, Jones, Gallen, Palacios, Joyce & Morrow], A625
- evaluation of efficacy of 3% bisulfite-free Nesacaine-CE administered as single dose epidurally for postpartum tubal ligations [Jones, Baker, Tessem, Longmire, Fretwell, Adenwala, Skjonsby, Kubicek & Joyce], A628
- influence of H<sub>2</sub> blockers on duration of vecuronium neuromuscular blockade in postpartum patients vs. nonpregnant controls [Tessem, Adenwala, Camp & Joyce], A451
- labor**
- continuous infusion epidural analgesia during, comparative study of [Chestnut, Owen, Ostman, Bates & Choi], A443
- epidural pH-adjusted 2% chloroprocaine for [Ross, Hughes, Glosten, Shnider, Preston, Rosen & Dailey], A629
- isoproterenol as safe and effective intravenous marker in [Leighton, DeSimone, Norris & Chayen], A626
- low dose epidural sufentanil and bupivacaine for [Little, McNitt, Choi & Tremper], A444
- neonatal neurobehavioral effects following maternal administration of epidural fentanyl during [Capogna, Celleno, McGannon, Richardson & Kennedy], A461
- maternal hemodynamic responses to epinephrine-containing local anesthetics in pre-eclampsia [Dror, Abboud, Moore, Gangolly, Zhu, Mantilla, Swart, Mosaad, Davis & Makar], A632
- neuromuscular transmission studies in preeclamptic women receiving magnesium sulfate [Ramanathan, Sibai, Pillai & Angel], A633
- orthopedic**
- comparison of sufentanil and fentanyl with N<sub>2</sub>O halothane anesthesia for total hip arthroplasty in elderly patients [Gauzit, Marty, Couderc, Bouyet, Flaischler & Desmonts], A120
- oxygen desaturation during cemented hip replacement [Rosenberg, Bernstein, Bernstein & Ramanathan], A551
- outpatient**
- antiemetic efficacy of oral metoclopramide vs. intravenous droperidol for laparoscopic procedures [Pandit, Kothary & Pandit], A425
- comparison of BW B1090U with succinylcholine to facilitation endotracheal intubation for [McPeck, Nozik, Walzer, Embree & Schwartz], A352
- diagnostic laparoscopy, fentanyl vs. isoflurane in [Lecky, Kitz, Andrews, Young & Conahan], A433
- premedication with intramuscular midazolam [Shafer, Urquhart, Doze & White], A419
- pediatric**
- airway closure in [Jonmarker, Larsson & Werner], A488
- analgesic effects of eutectic mixture of local anesthetics vs. intradermal lidocaine infiltration prior to venous cannulation in [Soliman, Broadman, Hannallah & McGill], A513
- apneic oxygenation in [Kernisan, Adler, Gibbons & Runions], A521
- baroreceptor reflex control of heart rate during fentanyl anesthesia in newborn infants [Murat, Levron & Saint-Maurice], A523
- carbon dioxide elimination during total cardiopulmonary bypass [Larach, Hensley, High, Williams & Snider], A19
- cardiovascular effects of vecuronium vs. pancuronium in premature infants with hyaline membrane disease [Hamza, Macquin, Wood, Devictor & Huault], A515
- caudal morphine for postoperative pain control in children undergoing cardiac procedures [Rosen, Rosen & Bank], A510
- comparison of two noninvasive estimates of PaCO<sub>2</sub> in critically ill neonates [McEvedy, McLeod, Munini, Kirpalani & Lerman], A485
- dose response of BW A938U in [Goudsouzian, Alifimoff, Liu, Embree, McNulty & Foster], A366
- effect of age on pharmacokinetics of intravenous lidocaine in [LeDez, Strong, Reider, Burrows & Lerman], A500
- effect of congenital heart disease on pharmacokinetics of intravenous lidocaine in [LeDez, Strong, Reider, Burrows & Lerman], A71
- effect of premedication on preoperative arterial saturation in children with congenital heart disease [De Bock, Petrilli, Davis & Motoyama], A492
- effect of preoperative oral droperidol on incidence of postoperative emesis after strabismus surgery [Kaya, Nicolson, Betts, Cochran & Swedlow], A531
- effects of anticholinergic agents on dysrhythmias during halothane anesthesia in [Badgwell, Heavenner, Cooper, Cockings & Lerman], A497
- effects of oral transmucosal fentanyl citrate premedication on gastric volume and acidity in [Leiman, Walford, Rawal, Katz, Marcus, van Nieuwenhuyzen, Cronau & Stanley], A489
- end-tidal carbon dioxide measurements in infants after cardiac surgery [Wessel, Boyd III & Hickey], A175
- end-tidal PCO<sub>2</sub> measurements in, with ventilation with Sechrist infant ventilator [Badgwell, McLeod, Lerman & Creighton], A511
- epidural sufentanil, analgesia and ventilatory response to CO<sub>2</sub> following [Benlabeled, Ecoffey, Levron, Flaisler & Gross], A517
- halothane or enflurane, respiratory effects of nitrous oxide during [Murat, Chaussain & Saint-Maurice], A498
- infant sensitivity to respiratory depression from fentanyl [Hertzka, Fisher, Gauntlett & Spellman], A512
- intranasal ketamine as induction adjunct in [Aldrete, Roman-de Jesus, Russell & D'Cruz], A514
- intraoperative changes in coagulation during liver transplantation in [Kang, Borland, Picone & Martin], A525
- lung function in supine and lateral decubitus positions in [Larsson, Jonmarker, Lindahl & Werner], A499
- measurement of postoperative pain and narcotic administration in infants using new clinical scoring system [Attia, Amiel-Tison, Mayer, Shnider & Barrier], A532
- metabolic rate measured by indirect calorimetry in [Lindahl], A524
- minimum effective concentration of bupivacaine for caudal analgesia after surgery in [Wolf, Valley, Fear, Roy & Lerman], A509
- neuromuscular effects of BW A938U in [Sarner, Brandom, Woelfel, Horn, Cook, Dong, Davis, Foster & McNulty], A365
- nitrous oxide does not affect postoperative vomiting in pediatric eye surgery [Gibbons, Davidson & Adler], A530
- oral atropine premedication in infants [Miller & Friesen], A491
- oxygen administration prevents hypoxemia during postoperative transport in [Patel, Norden & Hannallah], A529
- pharmacokinetics of amrinone in infants [Lawless, Burckart, Thompson & Siewers], A145
- pharmacokinetics of methadone in children and adolescents in perioperative period [Berde, Sethna, Holzman, Reidy & Gondek], A519
- preinduction with nasally administered sufentanil in [Henderson, Brodsky, Fisher, Brett & Hertzka], A495
- premedication in, oral transmucosal fentanyl citrate vs. oral solution of meperidine, diazepam, and atropine for [Nelson, Streisand, Mulder, East & Stanley], A490
- prolonged PT and PTT despite adequate heparin neutralization following cardiopulmonary bypass [Oh, Bell & Hughes], A22

- pulmonary and systemic hemodynamic effects of hyperventilation in infants after repair of congenital heart disease [Wessel, Hickey & Hansen], A526
- pulmonary function abnormalities in patients with persistent pulmonary hypertension of the newborn [Shutack, Fox, Shaffer & Moomjian], A487
- randomized trial of high-dose sufentanil in neonates undergoing cardiac surgery, hormonal and hemodynamic stress responses in [Anand, Carr & Hickey], A501
- randomized trial of high-dose sufentanil in neonates undergoing cardiac surgery, metabolic stress response in [Anand & Hickey], A502
- rectal methohexital in children undergoing computerized cranial tomography and magnetic resonance imaging scans [Griswold & Liu], A494
- rectal methohexitone induction with and without rectal suctioning after sleep, pharmacokinetic and pharmacodynamic study of [Kestin, McIlvaine, Lockhart, Kestin & Jones], A493
- serum bupivacaine during penile block in [Sfez, Le Mapihan, Dreux-Boucard & Mazoit], A260
- similarities between peripheral venous pH and pCO<sub>2</sub> and arterial blood gases in [Jordan & Jordan], A528
- spinal anesthesia with isobaric bupivacaine in infants [Mahe & Ecoffey], A527
- thiopental requirements for induction in newborns and infants 1-6 months of age [Westrin, Jonmarker, Larsson & Werner], A496
- three-breath determination of cardiac output in [Morton], A486
- time course of hemoglobin desaturation during immediate post-anesthetic period in [Motoyama, Borland & Mutich], A508
- use of caffeine in prevention of postanesthetic apnea in premature infants [Welborn, de Soto, Hannallah, Fink & Boeckx], A507
- urologic**
- epidural, for extracorporeal shock wave lithotripsy, neurological complications after [Korbon, Lander, Jenkins, Lippert & Carey], A228
- epidural, repeated, in cat, pathologic consequences of [Korbon, Grosslight, Norley & Herman], A229
- epidural bupivacaine and methadone analgesia for extracorporeal shock wave lithotripsy [Drenger, Shir, Magora & Davidson], A217
- epidural fentanyl for extracorporeal shock wave lithotripsy [Pandit, Powell, Crider, McLaren & Rutter], A225
- evaluation of bupivacaine and fentanyl epidural analgesia for extracorporeal shock wave lithotripsy [Bromage, Al-Faqih, Kadwal & Tamilrasan], A226
- pathologic effects on epidural space of epidural anesthesia and extracorporeal shock wave lithotripsy [Lander, Korbon, Monk, Arnold, Jenkins, Langley & Williamson], A227
- Anesthesia machines, See under Equipment**
- Anesthesia records, See Records, anesthesia**
- Anesthesiologists, See also under Manpower**
- high risk consult service and [Graf, LaMantia, Biondi & Barash], A168
- Anesthetic techniques**
- caudal, *See under Anesthetic techniques, peridural*
- extubation
- hemodynamic effects in postoperative critical care patients [Russell, Kofke, High & Snider], A131
- hypotension, induced
- comparison of effects of three methods for intraoperative blood conservation on systemic hemodynamics and blood replacement [Fahmy & Sunder], A134
- nitroglycerin**
- changes in regional myocardial blood flow and oxygen tension during, in subhuman primates [Fukunaga, Ito, Iijima, Kubota & Miyamoto], A8
- nicardipine vs., for treatment of postoperative hypertension, effects on hemodynamics and left ventricular function of [Benammar, Coriat, Houissa, Bruere, Brusset, Hag & Viars], A139
- nitroprusside**
- amrinone or, milrinone with, during enflurane anesthesia in dog [Makela & Kapur], A601
- cerebral blood flow and cerebral oxygen consumption during [Pinaud, Souron, Gazeau, Chatal & Lajat], A36
- clonidine reduces ADH response and dose requirement during [Ghignone, Quintin, Noe & Calvillo], A38
- comparison of left atrial and systemic venous administration for vasopressor clearance and pharmacodynamics during [Jaffe & Kien], A35
- decomposition of, by blood components [Bates & Baker], A307
- extent of ischemia following middle cerebral artery occlusion during [Cole, Drummond, Shapiro & Zurnow], A571
- hemorrhage complicating, regional cerebral blood flows during [Sperry, Monk, Durieux, Walker & Longnecker], A575
- isoflurane vs., for control of hypertension during thoracic aortic cross-clamping [Godet, Bertrand, Hag, Coriat, Cheour, Kieffer & Viars], A118
- plasma cyanide level measurements and [Van Etten, Triantis, Bloor, Stead & Flacke], A200
- regional cerebral blood flow in rats and [Monk, Sperry, Durieux, Walker & Longnecker], A577
- regional hemodynamic effects of [Monk, Sperry, Durieux, Walker & Longnecker], A34
- tachyphylaxis to, effect of captopril on [Stead, Bloor, Van Etten & Flacke], A37
- in vitro cyanide release from, in different intravenous solutions [Ikeda, Schweiss, Frank & Homan], A308
- randomized controlled trial of esmolol for [Ornstein, Matteo, Weinstein & Schwartz], A423
- hypothermia**
- arterial PO<sub>2</sub> correction for body temperature during [Moon & Camporesi], A20
- cardiopulmonary bypass with, activated coagulation time independently determines adequate anticoagulation during [Haddon, Gravlee, Bean, Miller & Angert], A26
- cardiopulmonary bypass with, cerebrovascular responsiveness to PaO<sub>2</sub> is preserved during [Rogers, Stump, Prough, Angert & Wallenhaupt], A12
- cardiopulmonary bypass with, effect of age on cerebral blood flow autoregulation during [Brusino, Reves, Prough, Stump & Croughwell], A10
- cardiopulmonary bypass with, effects of pump flow reduction on cerebral blood flow during [Prough, Stump, Rogers, Phipps & Hinshelwood], A11
- cardiopulmonary bypass with, influence of perfusion flow rates on cerebral blood flow and oxygen consumption during [Murkin, Farrar, Cleland, MacDonald & Mayer], A9
- enhanced cardiovascular effects of morphine during [Puig, Bansinath, Vargas, Lovitz & Turndorf], A312
- and oxygen delivery in canine asymmetric pulmonary edema treated with PEEP [Johnston, Vinten-Johansen, Strickland & Bowton], A155
- induction**
- abolition of gagging and hemodynamic response to awake laryngoscopy [Woods & Lander], A220

- aerosolized and intravenous lidocaine are no more effective than placebo for the control of hemodynamic responses to intubation [Laurito, Baughman, Polek, Riegler & VadeBoncouer], A29
- awake rigid and fiberoptic laryngoscopy, cardiovascular changes during [Schrader, Ovassapian, Dykes & Avram], A28
- in cardiomyopathy patients, sufentanil or ketamine for [Gutzke, Shah, Glisson, Griesemer & Rao], A64
- comparison of BW B1090U with succinylcholine to facilitate endotracheal intubation in outpatient surgical unit [McPeck, Nozik, Walzer, Embree & Schwartz], A352
- effect of labetalol on hemodynamic response to intubation [Inada, Cullen, Nemeskal & Teplick], a31
- fentanyl-thiopental, sixty-second tracheal intubation with BW B1090U after [Savarese, Ali, Basta, Embree & Risner], A351
- intranasal ketamine as adjunct to, in children [Aldrete, Roman-de Jesus, Russell & D'Cruz], A514
- intravenous labetalol before, ablation of hemodynamic responses to tracheal intubation with [Leslie, Kalayjian, McLoughlin, Russell & Plachetka], A30
- in newborns and infants 1-6 months of age, thiopental requirements for [Westrin, Jonmarker, Larsson & Werner], A496
- with propofol or thiopental followed by vecuronium, intraocular pressure during, influence of additional dose of induction agent on [Elliott, Mirakhur & Shepherd], A484
- rapid sequence, beat-by-beat cardiovascular responses to, effects of labetalol on [Bernstein, Nelson, Ebert, Woods & Roerig], A32
- rapid sequence, using propofol or thiopental with vecuronium, changes in intraocular pressure during [Elliott, Mirakhur & Shepherd], A483
- rapid sequence, vecuronium for, in patients undergoing cesarean section [Tessem, Johnson, Skjonsby, Kubicek & Joyce], A452
- thiopental, influence of age and gender on dose for [Dundee, Milligan & Furness], A662
- insufflation**
- absorption of gas with, during laparoscopy, hazard of [De Sousa & Tyler], A476
- laryngoscopy**
- awake, abolition of gagging and hemodynamic response to [Woods & Lander], A220
- difficult, in diabetes mellitus [Hogan, Rusy & Springman], A473
- difficult, prediction of [Arora, Patterson, Hagen & Pinchak], A472
- rigid and fiberoptic, awake, cardiovascular changes during [Schrader, Ovassapian, Dykes & Avram], A28
- peridural**
- caudal**
- minimum effective concentration of bupivacaine for, after surgery, in pediatrics [Wolf, Valley, Fear, Roy & Lerman], A509
- morphine for postoperative pain control in children undergoing cardiac procedures [Rosen, Rosen & Bank], A510
- epidural**
- baroreflex control during carotid endarterectomy under [Bonnet, Touboul, Szekely & Abhay], A263
- blood pressure response to epinephrine test dose in beta-blocked subjects [Hom, Johnson & Mulroy], A268
- bupivacaine, influence on platelet function and correlation with plasma bupivacaine concentration [Bovill & Odoom], A273
- bupivacaine and fentanyl, epinephrine effect on duration of analgesia with [Grice, Eisenach, Dewan & Weiner], A440
- bupivacaine and fentanyl for extracorporeal shock wave lithotripsy [Bromage, Al-Faqih, Kadiwal & Tamilrasan], A226
- bupivacaine and methadone analgesia for extracorporeal shock wave lithotripsy [Drenger, Shir, Magora & Davidson], A217
- butamben for treatment of metastatic cancer pain [Shulman], A245
- butorphanol, safety and efficacy of, in post-cesarean patients in regular clinical setting [Tan, Bresson, Brockmann & Brauer], A623
- butorphanol for postoperative analgesia [Karth, Velamati, Penas, Aravapalli & Lavine], A235
- butorphanol/fentanyl for post-cesarean delivery analgesia [Naulty, LaBove, Datta, Hunt & Ostheimer], A463
- cervical, bupivacaine, effects on respiratory function of [Chauvin, Lebrault, Gauneau, Goeau & Duvaldestin], A262
- cervical steroid injection, report and description of new approach to [Thoni, Cicala & Angel], A286
- clonidine, effects of, in pregnant ewes [Eisenach, Rose, Dewan & Grice], A448
- clonidine, hemodynamic and spinal cord blood flow effects of, in sheep [Grice & Eisenach], A219
- continuous fentanyl for postoperative pain relief in abdominal aortic aneurysms [Bell, Levette & Larjani], A234
- continuous infusion, during labor, comparative study of [Chestnut, Owen, Ostman, Bates & Choi], A443
- continuous infusion, plasma bupivacaine concentrations during [Flynn, McMurray, Moore, Dwyer & Dundee], A438
- continuous sufentanil infusion for postoperative analgesia [Cheng, Koebert, Hopwood, Stommel, Roerhig & Kay], A233
- dextran 40, treatment of post-spinal headache with [Aldrete, Barrios-Alarcon, Tapia, Penas & Lavine], A221
- effect of sympathetic blockade on tactile sensitivity [Kissin, McDaniel, Brown, Xavier & Bradley Jr.], A269
- evaluation of anesthetized pig vs. mannequin for teaching of [Owen, Choi, Chestnut, Bates & From], A223
- evaluation of 2-chloroprocaine as effective intravenous test dose for [Grice, Eisenach, Dewan & Mandell], A627
- for extracorporeal shock wave lithotripsy, neurological complications after [Korbon, Lander, Jenkins, Lippert & Carey], A228
- fentanyl, during labor, maternal administration of, neonatal neurobehavioral effects following [Capogna, Celleno, McGannon, Richardson & Kennedy], A461
- fentanyl, effect of diluent volume on analgesia produced by [Arcario, Vartikar, Johnson, Lema, Datta, Ostheimer & Naulty], A441
- fentanyl and alfentanil, postoperative, analgesic potency of [Chrubasik, Wust, Schulte-Monting, Thon & Zindler], A236
- fentanyl for extracorporeal shock wave lithotripsy [Pandit, Powell, Crider, McLaren & Rutter], A225
- fentanyl with lidocaine for cesarean section [Preston, Rosen, Daniels, Glosten, Shnider, Ross, Dailey & Hughes], A442
- fentanyl/morphine combination, improved surgical and post-cesarean analgesia with [Kotelko, Rottman, Wright, Stone, Rosenblatt & Yamashiro], A622
- foreign body implantation from epidural catheters [Lachica, Bendon, Ruebusch, Thompson & Santos], A202
- intravenous vs., for postoperative fentanyl [Estok, Glass, Goldberg, Freiburger & Sladen], A230
- isoproterenol as safe and effective intravenous marker in laboring women [Leighton, DeSimone, Norris & Chayen], A626
- lidocaine, improved by epidural ketamine, during cesarean section [Peng, Shulman, Blacato, Cutrone & Nyunt], A624
- lidocaine, influence of hepatic blood flow on pharmacokinetics after [Saada, Bonnet, Piraube, Benoit & Rey], A251

- low dose sufentanil and bupivacaine for labor anesthesia [Little, McNitt, Choi & Tremper], A444
- lumbar, ejection fraction in patients with poor left ventricular function improved by [Coriat, Benammar, Baron, Van Der Linden, Montejo, Bertrand, Daas & Viars], A259
- lumbar, in rabbits, distribution of <sup>3</sup>H-morphine following [Wang, Hiller, Holland, Simon, Hillman & Turndorf], A253
- lumbar, segmental wall motion in coronary artery disease patients evaluated by two dimensional echocardiography after [Saada, Duval, Bonnet, Rey & Castillon], A270
- lumbar sympathectomy and, pulse-volume change in lower extremity with [Park & Macnamara], A283
- maternal hemodynamic responses to epinephrine-containing local anesthetics in pre-eclampsia [Dror, Abboud, Moore, Gangolly, Zhu, Mantilla, Swart, Mosaad, Davis & Makar], A632
- morphine, prevention of respiratory depression from, in post-thoracotomy patients, with nalbuphine hydrochloride [Doran, Baxter, Samson, Penning & Dube], A248
- morphine, quality of analgesia with, as affected by volume of injectant, following cesarean delivery [Phan, Azar, Osborn, Lobo & Lear], A285
- morphine, systemic histamine release by [Korsh, Ramanathan, Parker & Turndorf], A445
- narcotic-local anesthetic synergism, does pH change contribute to [Bagley, Rice & Broadman], A278
- in parturient, safety and efficacy of 2% bisulfite-free chloroprocaine with and without epinephrine [Abboud, Mosaad, Makar, Gangolly, Dror, Zhu, Mantilla, Davis, Moore & Swart], A631
- pathologic effects on epidural space of extracorporeal shock wave lithotripsy and [Lander, Korbon, Monk, Arnold, Jenkins, Langley & Williamson], A227
- pH-adjusted 2% 2-chloroprocaine, for labor analgesia [Ross, Hughes, Glosten, Shnider, Preston, Rosen & Dailey], A629
- pH-adjusted 3% 2-chloroprocaine for postpartum tubal ligation [Glosten, Dailey, Preston, Shnider, Ross, Rosen & Hughes], A630
- for postpartum tubal ligations, evaluation of efficacy of 3% bisulfite-free Nesacaine-CE administered as single dose for [Jones, Baker, Tessem, Longmire, Fretwell, Adenwala, Skjonsby, Kubicek & Joyce], A628
- release of  $\beta$ -endorphin and antidiuretic hormone by epidural morphine [Donnenfeld, Ramanathan, Parker, Vargas & Turndorf], A446
- repeated, in cat, pathologic consequences of [Korbon, Grosslight, Norley & Herman], A229
- and rib cage distortion during spontaneous inspiration [Urmev, Lambert, Concepcion, Brown & Leith], A538
- spiradoline, analgesia and ventilatory characteristics of [Lander, Hayworth, Moscicki & DiFazio], A243
- sufentanil, in children, analgesia and ventilatory response to CO<sub>2</sub> following [Benlabeled, Ecoffey, Levron, Flaisler & Gross], A517
- test dose in obstetrics reconsidered [Baker, Longmire, Jones, Gallen, Palacios, Joyce & Morrow], A625
- variations of L<sub>5</sub>-S<sub>1</sub> interlaminar space in scoliosis, best approach from convex side [Barrios-Alarcon, Aldrete & Cedrola], A266
- lumbar**
- continuous fentanyl for postoperative pain relief in abdominal aortic aneurysms [Bell, Levette & Larijani], A234
- thoracic**
- and diaphragmatic activity after upper abdominal surgery [Pansard, Philip, Bahnini, Brichant, Delima, Mankikian & Viars], A537
- rectal**
- methohexital in children undergoing computerized cranial tomography and magnetic resonance imaging scans [Griswold & Liu], A494
- pediatric, methohexitone induction with and without rectal suctioning after sleep, pharmacokinetic and pharmacodynamic study of [Kestin, McIlvaine, Lockhart, Kestin & Jones], A493
- regional**
- abolition of gagging and hemodynamic response to awake laryngoscopy [Woods & Lander], A220
- axillary**
- for postoperative pain management [Gauermann, Lennon & Wedel], A242
- brachial plexus**
- axillary, bupivacaine pharmacokinetics during, in renal failure [Chauvin, Mazoit, Andrivon, Goeau & Duvaldestin], A261
- continuous block introducing catheters through Touhy needle in axilla [Plancarte, Amescua, Marron, San Miguel & Aldrete], A287
- bupivacaine scalp infiltration, effect of, on hemodynamic response to craniotomy under general anesthesia [Rung, Hillman, Thompson & Davis], A432
- bupivacaine-induced neural conduction blockade, verapamil potentiates [Parris, Misulis, Kambam, Franks & Dettbarn], A250
- cervical**
- epidural steroid injection, report and description of new approach to [Thoni, Cicala & Angell], A286
- combined interosseous tibial nerve and common peroneal nerve blocks for foot surgery [Shulman, Peng, Nyunt, Kepes & Blancato], A288
- comparison of infusion techniques for sedation during [Urquhart & White], A265
- effect of sympathetic blockade on tactile sensitivity [Kissin, McDanal, Brown, Xavier & Bradley Jr.], A269
- efficacy of methoxyflurane microdroplets in man [Kirkpatrick, Cappozzo & Haynes], A254
- frequency dependent block [Ford], A282
- hemodynamic and oxygen saturation changes among patients receiving [Kitz, Aukburg & Lecky], A264
- intercostal**
- bupivacaine with and without epinephrine for [Johnson, Mickler, Arthur, Rosenberg, Wilson & Covino], A257
- intrapleural, using 0.75% bupivacaine [El-Naggar, Raad, Yogarathnam, Poritz & Bennett], A258
- unilateral, bilateral analgesia after [Kuhlman, Ahmad, Cauquil, Roche & Edouard], A284
- intravenous**
- epidural vs., for postoperative fentanyl [Estok, Glass, Goldberg, Freiburger & Sladen], A230
- morphine injections in cisterna magna for intractable pain in cancer patients [Schoeffler, Haberer, Monteillard & Bouetard], A246
- serum bupivacaine during penile block in children [Sfez, Le Mapihan, Dreux-Boucard & Mazoit], A260
- sympathetic blockade vs. adenosine monophosphate for prevention and treatment of postherpetic neuralgia [Brookshire, Cook & Sklar], A247
- spinal**
- hypobaric, effect of injection rate on level and duration of [Atchison, Wedel, Wilson & Offord], A255



- intrathecal, combined morphine and bupivacaine for cesarean section [Abouleish, Rawal, Fallon & Hernandez], A619
- intrathecal, meperidine vs. tetracaine for elective cesarean section [Talaferre, Jacquinet, Legagneux, Jasson & Conseiller], A620
- intrathecal morphine, mini-dose, for relief of post-cesarean pain [Abboud, Dror, Mosaad, Zhu, Gangolly, Mantilla, Swart, Silao, Makar, Moore, Davis & Lee], A464
- intrathecal morphine, perioperative hemodynamic effects of [Chester, Schubert, Brandon, Pudimat & Pray], A267
- intrathecal morphine, pharmacodynamics of [Nishio, Kitahata, Murata, Sinatra & Collins], A394
- with isobaric bupivacaine, in infants [Mahe & Ecoffey], A527
- microdose intrathecal clonidine and morphine for postoperative analgesia [Coombs, Jensen & Murphy], A238
- morphine-induced inhibition of micturition reflex in unanesthetized rats, drug effects on urinary bladder tone during [Durant & Yaksh], A675
- and rib cage distortion during spontaneous inspiration [Urney, Lambert, Concepcion, Brown & Leith], A538
- subarachnoid clonidine, spinal blood flow effect of [Crosby & Russo], A417
- subarachnoid fentanyl, for postoperative analgesia [Bohannon & Estes], A237
- subarachnoid fentanyl-bupivacaine, perioperative analgesia with [Hunt, Datta, Hauch, Ostheimer, Herwig & Naulty], A621
- urodynamic studies after intrathecal fentanyl and buprenorphine in dog [Drenger, Pikarsky & Magora], A240
- variations of L<sub>5</sub>-S<sub>1</sub> interlaminar space in scoliosis, best approach from convex side [Barrios-Alarcon, Aldrete & Cedrola], A266
- topical**
- analgesic effects of eutectic mixture of local anesthetics vs. intradermal lidocaine infiltration prior to venous cannulation in children [Soliman, Broadman, Hannallah & McGill], A513
- Anesthetics, gases**
- nitrous oxide**
- alfentanil with, anesthetic depth for, can EEG be used to monitor [Stanski, Buyk, Ausems, Arts, Kramer & Spierdijk], A401
- cerebral blood flow, oxygen consumption and EEG response to, in rabbit, effects of anesthetics and PaCO<sub>2</sub> on [Kaieda, Todd, Cook & Warner], A409
- concentration of, human bone marrow engraftment delay and [Hogan & Cypcar], A477
- diazepam, fentanyl and, study of spontaneous and purposeful movement as predictor of postoperative recall during [Stolzy, Couture & Edmonds Jr.], A376
- evaluation of personal dosimeters to measure exposure to [Kim, Aldrete & Kullavanijaya], A163
- gradual or abrupt administration of, in canine model of critical coronary stenosis, induces regional myocardial dysfunction that is worsened by halothane [Leone, Philbin, Lehot & Foex], A676
- halothane and, comparison of sufentanil and fentanyl with, for total hip arthroplasty in elderly patients [Gauzit, Marty, Couderc, Bouyet, Flaischler & Desmonts], A120
- during halothane or enflurane anesthesia, in children, respiratory effects of [Murat, Chaussain & Saint-Maurice], A498
- inactivation of methionine synthase by, and decrease in folic acid activity in man [Hawkins, Snider, Russell, Davis & Biebuyck], A292
- ischemic left ventricular dysfunction in pig not worsened by [Cason, Mazer, Demas & Hickey], A46
- isoflurane and, 40 Hz steady state evoked potentials during anesthesia with [Hogan], A402
- isoflurane and, interaction of, on regional cerebral ischemia in rat [Baughman, Hoffman, Albrecht & Miletich], A578
- narcotics and, neuromuscular effects of BW B1090U in patients under anesthesia with [Choi, Mehta, Murray, Forbes, Sokoll, Gergis, Krol, Abou-Donia & Cotten], A355
- narcotics and, neuromuscular effects of BW B1090U in patients under anesthesia with [Lee, Cheng, Yang, Cantley, Harris, Weakly & Whitehead], A354
- neuromuscular blocking effect of nondepolarizing muscle relaxants increased by [Kinjo, Nagashima, Duncalf, Goldiner & Foldes], A372
- oxygen and, isoflurane anesthesia with, healthy surgical patients receiving, pharmacokinetics and pharmacodynamics of BW B1090U in [deBros, Basta, Ali, Wargin & Welch], A609
- postoperative recognition test after [Stolzy, Couture & Edmonds Jr.], A377
- postoperative vomiting in pediatric eye surgery not affected by [Gibbons, Davidson & Adler], A530
- relationship between cerebral blood flow and somatosensory evoked potentials during graded incomplete ischemia in goats under general anesthesia [Kochs & Schulte am Esch], A403
- 70%, effects on canine pulmonary circulation [Hasinoff, Papdimitropoulos & Prewitt], A103
- teratogenic effects of, in rats, prevented by halothane and isoflurane, but not by folic acid [Fujinaga, Baden, Yhap & Mazze], A456
- trace concentrations**
- evaluation of personal dosimeters to measure N<sub>2</sub>O exposure when using different gas flows [Kim, Aldrete & Kullavanijaya], A163
- Anesthetics, intravenous**
- alfentanil**
- clinical induction with, do seizures occur during [Smith, Bickford, Sanford Jr., Dec-Silver & Blasco], A385
- direct vs. indirect circulatory effects of [Flacke, Vercellino, Flacke, McIntee & Van Etten], A47
- hemodynamic effects of, in canine septic shock model [Van der Linden, Gilbert, Engelman & Vincent], A413
- high dose, effects on posterior tibial nerve somatosensory evoked potentials [Kalkman, van Rheineck, Leyssius, Hessclink & Bovill], A386
- midazolam and, in man, efficacy of RO 15-1788 vs. physostigmine after [Breimer, Hennis, Spierdijk & Bovill], A660
- midazolam and, total intravenous anesthesia with, reversal of, flumazenil in [Raeder, Hole, Arnulf & Grynne], A659
- muscle rigidity induced by, in rat, localization of brain sites that may play role in [Weinger, Cline, Blasco, Smith & Koob], A384
- with N<sub>2</sub>O, anesthetic depth for, can EEG be used to monitor [Stanski, Vuyk, Ausems, Arts, Kramer & Spierdijk], A401
- in piglet, hemodynamic and pharmacokinetic effects of [Davis, Stiller, Cook, Ingram & Roeber], A505
- chloralose**
- enflurane and, effects of verapamil on cardiac electrophysiology in presence of [Hantler, Stockton, Mattson & Knight], A96
- diazepam**
- effects on oxygen demand and energy status in isolated hepatocytes [Becker, Holland, Miletich & Albrecht], A321
- nitrous oxide, fentanyl and, study of spontaneous and purposeful movement as predictor of postoperative recall during [Stolzy, Couture & Edmonds Jr.], A376
- droperidol**
- acute thrombus formation in stenosed dog coronary arteries abolished by [Bertha, Sill, Nugent & Folts], A78

- oral metoclopramide vs., antiemetic efficiency of, for outpatient laparoscopic procedures [Pandit, Kothary & Pandit], A425
- etomidate**  
neurologic outcome following regional cerebral ischemia with [Baughman, Hoffman, Miletich & Albrecht], A582  
thiopental vs., for elective cardioversion [Ford, Maze & Gaba], A143
- fentanyl**  
administered by computer controlled infusion pump, pharmacokinetic analysis of [Shafer, Martinez, Stanski & Scott], A666  
anesthesia with, in newborn infants, baroreceptor reflex control of heart rate during [Murat, Levron & Saint-Maurice], A523  
clinical induction with, dose-seizures occur during [Smith, Bickford, Sanford Jr., Dec-Silver & Blasco], A385  
dose-response for BW A938U [Lynam, Caldwell & Miller], A362  
effects on lung metabolism [Watkins & Martin], A296  
interactions with etomidate [Kissin, Brown & Bradley Jr.], A383  
isoflurane vs., in outpatient diagnostic laparoscopy [Lecky, Kitz, Andrews, Young & Conahan], A433  
nitrous oxide, diazepam and, study of spontaneous and purposeful movement as predictor of postoperative recall during [Stolzy, Couture & Edmonds Jr.], A376  
onset time of [Cooke & Scott], A393  
pentobarbital and, interaction on cerebral and peripheral hemodynamics in newborn lambs of [Yaster, Koehler & Traystman], A516  
pharmacokinetics of, during continuous infusion in critically ill patients [Alazia, Levron, Guidon & Francois], A665  
plasma atrial natriuretic peptide and angiotensin II concentrations during anesthesia with, in rat [Hoffman, Phillips & Kimura], A320  
postoperative recognition test after [Stolzy, Couture & Edmonds Jr.], A377  
protection against spinal cord injury with, in rat [Cole, Shapiro, Drummond & Zivin], A585  
respiratory depression from, infant sensitivity to [Hertzka, Fisher, Gauntlett & Spellman], A512  
subcellular effects relating to actions in intact myocardium [Adams, Pruett, Blair, Crumrine & Balser], A62  
sufentanil vs., with N<sub>2</sub>O halothane anesthesia for total hip arthroplasty in elderly patients [Gauzit, Marty, Couderc, Bouyet, Fleischler & Desmonts], A120  
thiopental and, induction of, sixty-second tracheal intubation with BW 1090U after [Savarese, Ali, Basta, Embree & Risner], A351  
thiopental and, relative potency of BW B1 090U during anesthesia with [Weber, Brandom, Powers, Samer, Woelfel, Cook, Foster & Weakly], A356
- flunitrazepam**  
pharmacokinetic alterations of, influence on residual sedation in elderly of [Servin, Luscombe, Farinotti & Desmonts], A656
- ketamine**  
effects on lung metabolism [Watkins & Martin], A296  
effects on somatic and autonomic nerves in peripheral nervous system [Tabatabai, deGroat, Booth & Kirimli], A427  
epidural, epidural lidocaine anesthesia improved by, during cesarean section [Peng, Shulman, Blancato, Cutrone & Nyunt], A624  
hemodynamic effects of, in canine septic shock model [Van der Linden, Gilbert, Engelman & Vincent], A413  
induction in cardiomyopathy patients [Gutzke, Shah, Glisson, Griesemer & Rao], A64  
intranasal, as induction adjunct in children [Aldrete, Roman-de Jesus, Russell & D'Cruz], A514  
isoflurane vs., comparative inotropic effects in isolated human atrial tissues [Chang, Luk, Lin & Wei], A92  
in morphine tolerant mice [Finck, Samaniego & Ngai], A396  
used to stop status epilepticus, in rats, neuropathologic effects of [Kofe, Towfighi, O'Connell, Derr & Hawkins], A390
- methohexital**  
neurologic outcome following regional cerebral ischemia with [Baughman, Hoffman, Miletich & Albrecht], A582  
pediatric rectal induction with and without rectal suctioning after sleep, pharmacokinetic and pharmacodynamic study of [Kestlin, McIlvaine, Lockhart, Kestlin & Jones], A493  
rectal, in children undergoing computerized cranial tomography and magnetic resonance imaging scans [Griswold & Liu], A494
- midazolam**  
absence of ventilatory agonist or inverse agonist effects of overdose of RO 15-1788 [Forster, Crettenand & Morel], A144  
alfentanil and, in man, efficacy of RO 15-1788 vs. physostigmine after [Breimer, Hennis, Spierdijk & Bovill], A660  
alfentanil and, total intravenous anesthesia with, reversal of, flumazenil in [Raeder, Hole, Arnulf & Grynne], A659  
amnesia induced by, neurocognitive profile of [Galus, Pohorecki, French, Pandit & Domino], A418  
anesthetic efficacy of, in enflurane anesthetized dog [Hall, Lasker & Hug Jr.], A657  
direct vs. indirect circulatory effects of [Flacke, Vercellino, Flacke, McIntee & Van Etten], A47  
neurologic outcome following regional cerebral ischemia with [Baughman, Hoffman, Miletich & Albrecht], A582  
pharmacokinetics of, in anesthetized cirrhotic patients [Chauvin, Haberer, Ferrier, Trouvin, Farinotti & Duvaldestin], A290  
prolonged elimination of, in patients recovering from cardiac surgery [Maitre, Funk & Crevoisier], A655  
used to stop status epilepticus, in rats, neuropathologic effects of [Kofe, Towfighi, O'Connell, Derr & Hawkins], A390
- morphine**  
dose-response for BW A938U [Lynam, Caldwell & Miller], A362  
interactions with etomidate [Kissin, Brown & Bradley Jr.], A382  
intravenous or fourth cerebroventricular infusions of, in awake dog, relationship of cisternal CSF morphine levels to changes in ventilation during [Pelligrino, Peterson, Henderson & Albrecht], A553
- pentobarbital**  
disturbance of autonomic nervous system control of pulmonary circulation by, in conscious dogs [Goll, Nyhan, Clougherty, Chen & Murray], A547  
effect on pulmonary vascular response to hypoxia in isolated sheep lungs [Martin & Wetzel], A326  
effects on cerebral blood flow of, isoflurane influence on [Scheller, Smith, Todd & Drummond], A406  
effects on lung metabolism [Watkins & Martin], A296  
fentanyl and, interaction on cerebral and peripheral hemodynamics in newborn lambs of [Yaster, Koehler & Traystman], A516  
nimodipine and, survival time in hypoxic mice and [Baker, Costas, Gintautas, Doss, Humayun & Abadir], A430  
selective inhibition of phosphatidylinositol hydrolysis by, in cultured vascular endothelial cells [Robinson-White, Robinson & Muldoon], A315
- propofol**  
administered by prolonged continuous infusion, in man, pharmacokinetics of [Albanese, Auffray, Lacarelle, Martin & Gouin], A667  
during cesarean section, placental transfer and neonatal effects of [Dailland, Lirzin, Cockshott, Jorrot & Conseiller], A454

- effects on baroreflex control of heart rate and sympathetic activity in humans [Samain, Marty, Gauzit, Bouyet, Couderc & Desmonts], A75
- induction of anesthesia with, followed by vecuronium, intraocular pressure during, influence of additional dose on [Elliott, Mirakhur & Shepherd], A484
- pharmacokinetics and pharmacodynamics of [Shafer, Shafer, Doze & White], A668
- recovery characteristics following, compared with thiopental-isoflurane [Doze, Shafer & White], A398
- with vecuronium, rapid sequence induction of anesthesia using, changes in intraocular pressure during [Elliott, Mirakhur & Shepherd], A483
- steroid**
- cervical epidural injection of, report and description of new approach to [Thoni, Gicala & Angell], A286
- sufentanil**
- age effects on plasma protein binding of [Meistelman, Benhamou, Mahe, Levron, Mazoit, Ecoffey & Truffa-Bachi], A518
- bupivacaine and, epidural, low dose, for labor anesthesia [Little, McNitt, Choi & Tremper], A444
- clinical induction with, do seizures occur during [Smith, Bickford, Sanford Jr., Dec-Silver & Blasco], A385
- different response of bolus or continuous infusion on brain microcirculation [Lu, Prinscott, Frost, Gibson & Goldiner], A89
- in dogs, cerebral hemodynamic and metabolic effects of [Milde & Milde], A570
- effect of adrenergic stress response on myocardial tolerance of global ischemia during anesthesia with [Hill, Pollard, Simeone, Reves & Lowe], A73
- fentanyl vs., with N<sub>2</sub>O halothane anesthesia for total hip arthroplasty in elderly patients [Gauzit, Marty, Couderc, Bouyet, Flaischler & Desmonts], A120
- hemodynamic effects of BW A938U in coronary artery bypass graft and valve replacement patients receiving [Stoops, Curtis, Kovach, McCammon, Stoelting & Warren], A368
- hepatic clearance of, in humans [Schedewie, Lee, Cowan, Gold, Bottorff, Peters, Heerdt & Angell], A291
- high dose, effects on posterior tibial nerve somatosensory evoked potentials [Kalkman, van Rheineck Leyssius, Hesselink & Bovill], A386
- high-dose, in neonates undergoing cardiac surgery, hormonal and hemodynamic stress responses to [Anand, Carr & Hickey], A501
- high-dose, in neonates undergoing cardiac surgery, metabolic stress response to [Anand & Hickey], A502
- induction in cardiomyopathy patients [Gutzke, Shah, Glisson, Griesemer & Rao], A64
- isoflurane vs., effects on experimental myocardial infarction [Davis, Sidi, McCallum, Rush & Ruiz], A99
- negative chronotropic actions in chronically instrumented dogs pretreated with propranolol and/or diltiazem [Schmeling, Kampine, Bernstein & Warltier], A90
- onset time of [Cooke & Scott], A393
- pharmacokinetics of, in elderly [Spielvogel, Caron, Levron & Lienhart], A389
- thiopental**
- age and intravascular mixing during induction with [Henthorn, Krejcie & Avram], A663
- chronically instrumented rat model for combined pharmacokinetic and CNS pharmacodynamic assessment of [Ebling, Burm, Field & Stanski], A674
- effects on oxygen demand and energy status in isolated hepatocytes [Becker, Holland, Miletich & Albrecht], A321
- etomidate vs., for elective cardioversion [Ford, Maze & Gaba], A143
- fentanyl and, induction of, sixty-second tracheal intubation with BW 1090U after [Savarese, Ali, Basta, Embree & Risner], A351
- fentanyl and, relative potency of BW B1090U during anesthesia with [Weber, Brandom, Powers, Sarner, Woelfel, Cook, Foster & Weakly], A356
- induction dose of, effect of alcohol usage on [Milligan, Dundee & Furness], A397
- induction of anesthesia with, followed by vecuronium, intraocular pressure during, influence of additional dose on [Elliott, Mirakhur & Shepherd], A484
- influence of age and gender on induction dose of [Dundee, Milligan & Furness], A662
- isoflurane and, recovery characteristics following, propofol vs. [Doze, Shafer & White], A398
- isoflurane vs., and neurologic outcome following focal ischemia in primates [Milde, Milde, Lanier & Michenfelder], A579
- kinetics and age, reassessment of [Krejcie, Henthorn, Avram & Morton], A664
- long term sterility of diluted or pre-drawn solutions of [Mayweather, Santos, Juneja & Stanek], A160
- postoperative recognition test after [Stolzy, Couture & Edmonds Jr.], A377
- requirements of, for induction of anesthesia in newborns and infants 1-6 months of age [Westrin, Jonmarker, Larsson & Werner], A496
- steady state plasma concentration-EEG effect relationship of [Buhner, Maitre, Ebling & Stanski], A399
- used to stop status epilepticus, in rats, neuropathologic effects of [Kofe, Towfighi, O'Connell, Derr & Hawkins], A390
- with vecuronium, rapid sequence induction of anesthesia using, changes in intraocular pressure during [Elliott, Mirakhur & Shepherd], A483
- Anesthetics, local**
- bupivacaine**
- 0.75%, intrapleural intercostal nerve block using [El-Naggar, Raad, Yogaratnam, Poritz & Bennett], A258
- arrhythmogenicity of, in heart cell culture, progesterone effect on [Baum, Miletich & Curran], A439
- chemical stability of, in pH-adjusted solutions [Bonhomme, Benhamou, Martre & Preaux], A279
- diltiazem and, in conscious dogs [Ahmad, Edouard, Berdeaux, Froidevaux & Samii], A271
- does cardiotoxicity impede only sodium channels [d'Athis, Eledjam, de la Coussaye, Brugada, Desch & Sassine], A275
- epidural anesthesia with, influence on platelet function and correlation with plasma concentration [Bovill & Odoom], A273
- epidural continuous infusion during labor, 0.0625% with 0.0002% fentanyl vs. 0.125% [Chestnut, Owen, Ostman, Bates & Choi], A443
- epidural fentanyl and, for extracorporeal shock wave lithotripsy [Bromage, Al-Faqih, Kadiwal & Tamirasan], A226
- epidural methadone and, for extracorporeal shock wave lithotripsy [Drenger, Shir, Magora & Davidson], A217
- with and without epinephrine, for intercostal nerve blocks [Johnson, Mickler, Arthur, Rosenberg, Wilson & Covino], A257
- fentanyl and, epidural, epinephrine effect on duration and analgesia with [Grice, Eisenach, Dewan & Weiner], A440
- fentanyl and, subarachnoid, perioperative analgesia with [Hunt, Datta, Hauch, Ostheimer, Herwig & Naulty], A621
- high plasma levels raise ventricular fibrillation threshold [Ponhold, Gombotz, Rehak, Eichtinger & Stenzl], A272

- intrathecal, morphine combined with, for cesarean section [Abouleish, Rawal, Fallon & Hernandez], A619
- isobaric, spinal anesthesia with, in infants [Mahe & Ecoffey], A527
- lidocaine vs., maternal and fetal uptake of, at steady state plasma drug concentrations [Morishima, Pedersen, Santos, Finster & Covino], A437
- minimum effective concentration of, for caudal analgesia after surgery in pediatrics [Wolf, Valley, Fear, Roy & Lerman], A509
- narcotic synergism with, does pH change contribute to [Bagley, Rice & Broadman], A278
- neural conduction blockade induced by, verapamil potentiates [Parris, Misulis, Kambam, Franks & Dettbarn], A250
- during penile block in children [Sfez, Le Mapihan, Dreux-Boucard & Mazoit], A260
- pharmacokinetic analysis of, after short and long term infusions, in conscious dogs [Mazoit, Lambert, Froidevaux, Gerard & Berdeaux], A274
- plasma concentrations during continuous epidural infusion [Flynn, McMurray, Moore, Dwyer & Dundee], A438
- scalp infiltration with, effect of, on hemodynamic response to craniotomy under general anesthesia [Rung, Hillman, Thompson & Davis], A432
- serum protein binding and cardiotoxicity of [Santos, Pedersen, Finster, Morishima & Arthur], A249
- sufentanil and, epidural, low dose, for labor anesthesia [Little, McNitt, Choi & Tremper], A444
- butamben**
- epidural, for treatment of metastatic cancer pain [Shulman], A245
- chloroprocaine**
- epidural pH-adjusted 2%, evaluation of, for labor analgesia [Ross, Hughes, Glosten, Shnider, Preston, Rosen & Dailey], A629
- epidural pH-adjusted 3%, for postpartum tubal ligation [Glosten, Dailey, Preston, Shnider, Ross, Rosen & Hughes], A630
- evaluation of, as effective intravenous test dose for epidural anesthesia [Grice, Eisenach, Dewan & Mandell], A627
- evaluation of efficacy of 3% bisulfite-free single dose for postpartum tubal ligations [Jones, Baker, Tessem, Longmire, Fretwell, Adenwala, Skjonsby, Kubicek & Joyce], A628
- is neutralization necessary [Buffington & Powers], A256
- and selective damage of Schwann cells of unmyelinated nerve fibers [Myers, Kalichman & Powell], A276
- with and without epinephrine, 2% bisulfite-free, safety and efficacy for epidural anesthesia in parturient [Abboud, Mosaad, Makar, Gangolly, Dror, Zhu, Mantilla, Davis, Moore & Swart], A631
- epinephrine-containing, maternal hemodynamic responses to, in pre-eclampsia [Dror, Abboud, Moore, Gangolly, Zhu, Mantilla, Swart, Mosaad, Davis & Makar], A632
- etidocaine**
- and selective damage of Schwann cells of unmyelinated nerve fibers [Myers, Kalichman & Powell], A276
- lidocaine**
- aerosolized and intravenous, vs. placebo, for control of hemodynamic responses to intubation [Laurito, Baughman, Polek, Riegler & VadeBoncouer], A29
- bupivacaine vs., maternal and fetal uptake of, at steady state plasma drug concentrations [Morishima, Pedersen, Santos, Finster & Covino], A437
- continuous infusion of, protects in temporary focal cerebral ischemia [Shokunbi, Gelb, Miller & Wu], A580
- diltiazem and, in conscious dogs [Ahmad, Edouard, Berdeaux, Froidevaux & Samii], A271
- effects on oxygen demand and energy status in isolated hepatocytes [Becker, Holland, Miletich & Albrecht], A321
- effects on single sodium channel currents in canine ventricular cells [Berman, Camarero & Siegelbaum], A426
- epidural, anesthesia during cesarean section with, epidural ketamine improvement of [Peng, Shulman, Blancato, Cutrone & Nyunt], A624
- epidural, fentanyl with, for cesarean section [Preston, Rosen, Daniels, Glosten, Shnider, Ross, Dailey & Hughes], A442
- frequency dependent block [Ford], A282
- high plasma levels raise ventricular fibrillation threshold [Ponhold, Gombotz, Rehak, Eichinger & Stenzl], A272
- influence of hepatic blood flow on pharmacokinetics after epidural administration [Saada, Bonnet, Pirabe, Benoit & Rey], A251
- intradermal, vs. eutectic mixture of local anesthetics, prior to venous cannulation in children, analgesic effects of [Soliman, Broadman, Hannallah & McGill], A513
- intrapleural, for treatment of posttraumatic thoracic pain [Carli, Mazoit, Zetlaoui & Lambert], A241
- intravenous, effect of age on pharmacokinetics of, in pediatrics [LeDez, Strong, Reider, Burrows & Lerman], A500
- intravenous, pharmacokinetics of, effect of congenital heart disease on, in pediatrics [LeDez, Strong, Reider, Burrows & Lerman], A71
- pH-adjusted solutions of, effects on compound action potential in intact rat sciatic nerves [Okamura, Reisner & Kalichman], A281
- phosphatidylinositol hydrolysis in vascular endothelial cells altered by [Brown & Robinson-White], A277
- protection against spinal cord injury with, in rat [Cole, Shapiro, Drummond & Zivin], A585
- and selective damage of Schwann cells of unmyelinated nerve fibers [Myers, Kalichman & Powell], A276
- mepivacaine**
- serum protein binding and cardiotoxicity of [Santos, Pedersen, Finster, Morishima & Arthur], A249
- tetracaine**
- intrathecal, meperidine vs., for elective cesarean section [Talafer, Jacquinet, Legagneux, Jasson & Conseiller], A620
- Anesthetics, volatile**
- chloroform**
- genetic variation of responses to, in *C. elegans* [Morgan, Sedsensky, Cascorbi & Meneely], A382
- diethyl ether**
- genetic variation of responses to, in *C. elegans* [Morgan, Sedsensky, Cascorbi & Meneely], A382
- enflurane**
- alteration of compensatory humoral and hemodynamic responses to hemorrhage by [Zimpfer, Mayer, Kotai & Placheta], A53
- anesthesia with, in dog, arrhythmogenic plasma levels of epinephrine during [Hayashi, Sumikawa, Tashiro, Yoshiya & Yamatodani], A57
- anesthesia with, in dog, comparison of miltirone with amrinone or nitroprusside during [Makela & Kapur], A601
- capillary perfusion during [Goetz, Conzen, Schmidt, Hobbhahn, Peter & Brendel], A7
- in children, respiratory effects of nitrous oxide during anesthesia with [Murat, Chaussain & Saint-Maurice], A498
- chloralose and, effects of verapamil on cardiac electrophysiology in presence of [Hantler, Stockton, Mattson & Knight], A96
- comparative effects on  $Ca^{++}$  transport and  $Ca^{++}$  channel release functions in isolated skeletal muscle SR membranes [Nelson & Swco], A300

- comparative hepatotoxicity of, using isolated perfused rat liver [Mathieu, Ford, Ray & Taylor], A302
- diltiazem and, on specialized intracardiac conduction [Atlee, Brownlee & Kreigh], A60
- dog anesthetized with, anesthetic efficacy of midazolam in [Hall, Lasker & Hug Jr.], A657
- effects of anesthesia and dosage on neuromuscular blockade with BW A938U [Katz, Fragen, Shanks, Dunn, Rudd & Williams], A364
- effects on myocardial relaxation [Housmans & Murat], A51
- effects on spontaneous calcium release from isolated sarcoplasmic reticulum of rabbit white skeletal muscle [Peterson Jr., Baroody & Blanck], A317
- genetic variation of responses to, in *C. elegans* [Morgan, Sedsensky, Cascorbi & Meneely], A382
- in isolated mammalian cardiac muscle, negative inotropic effects of, time course of [Housmans & Murat], A52
- and mechanical properties of rat heart muscle during maturation [Shimosato, Mizukawa, Tinker, Ross & Kayaba], A97
- moderate hypotensive anesthesia with, ischemic heart and [Hobbs, Conzen, Goetz, Seidel, Gonschior, Brendel & Peter], A589
- prejunctional effects of, in man and cat [Stanec & Baker], A336
- verapamil accentuates effects of, more than isoflurane or halothane, on A-V conduction time and incidence of complete A-V block in isolated guinea pig heart [Bosnjak, Marijic, Stowe & Kampine], A61
- verapamil and, on specialized intracardiac conduction [Atlee, Brownlee & Kreigh], A59
- fluroxene**
- genetic variation of responses to, in *C. elegans* [Morgan, Sedsensky, Cascorbi & Meneely], A382
- halothane**
- anesthesia with, in children, effects of anticholinergic agents on dysrhythmias during [Badgwell, Heavner, Cooper, Cockings & Lerman], A497
- cerebral blood flow during carotid endarterectomy and [Young, Prohovnik, Correll, Wang & Lucas], A416
- characterization of oxidation by liver microsomes and purified cytochrome P-450 using gas chromatographic-mass spectrometry assay [Waskell, Konopka, Gruenke & Koop], A314
- in children, respiratory effects of nitrous oxide during anesthesia with [Murat, Chaussain & Saint-Maurice], A498
- comparative effects on  $\text{Ca}^{++}$  transport and  $\text{Ca}^{++}$  channel release functions in isolated skeletal muscle SR membranes [Nelson & Sweo], A300
- comparative hepatotoxicity of, using isolated perfused rat liver [Mathieu, Ford, Ray & Taylor], A302
- and decrease in albumin synthesis [Franks, Kruskal, Kirsch, Beachy & Harrison], A294
- depressor responses to noxious stimuli induced by, in rat [Gibbs, Larach, Skeehan & Schuler], A412
- diltiazem and, on specialized intracardiac conduction [Atlee, Brownlee & Kreigh], A60
- direct inhibition of sarcoplasmic reticular function in intact myocardium by [Komai & Rusy], A54
- dose-response for BW A938U [Lynam, Caldwell & Miller], A362
- echocardiographic assessment of myocardial contractility during anesthesia with [Mazzei, Dan, Scheller, Dittrich & Sahn], A590
- effect of concentration on apneic threshold in lambs [Kurth, Hutchinson, Davenport & Caton], A520
- effects of anesthesia and dosage on neuromuscular blockade with BW A938U [Katz, Fragen, Shanks, Dunn, Rudd & Williams], A364
- effects on acetylcholine activated ion channels of [Sokoll & Davies], A410
- effects on cardiac contractility in non-insulin treated spontaneously diabetic rats [Baum, Miletich, Clarke & Pelligrino], A95
- effects on function of sarcoplasmic reticulum in skinned myocardial fibers of newborn and adult rabbit [Krane & Su], A93
- effects on spontaneous calcium release from isolated sarcoplasmic reticulum of rabbit white skeletal muscle [Peterson Jr., Baroody & Blanck], A317
- free intracellular calcium concentration in isolated adult rat heart cells transiently increased by [Wheeler, Rice, Hansford & Lakatta], A94
- genetic variation of responses to, in *C. elegans* [Morgan, Sedsensky, Cascorbi & Meneely], A382
- heart preparations pretreated with, isolated from malignant hyperthermia susceptible pigs, effects of caffeine on transmembrane potential in [Roewer, Rumberger, Dziadzka & Schultze am Esch], A297
- hemodynamic effects of, in canine septic shock model [Van der Linden, Gilbart, Engelman & Vincent], A413
- hemodynamic response to, in rat, influence of renal vasodilating infusions of Fenoldopam on [Ebling, Nunez & Field], A101
- hepatic oxygen supply during anesthesia with, in guinea pigs [Gelman & Hursh], A301
- high frequency response of central mass spectrometer system to [Scamman], A176
- horses anesthetized with, trichlorfon does not alter neuromuscular blocking activity of atracurium in [Hildebrand, Holland & Hill], A350
- isoflurane and, co-administered, anesthetic potency of, in rat [Skeehan, Larach, Hensley Jr., Schuler & Derr], A379
- isoflurane vs., and myocardial depressant effects on immature and mature feline papillary muscle function [Wolf, Neal & Mathew], A504
- isoflurane vs., spontaneous ventilation effects of [Slavchenko, Sandler, Murphy, Vosu & Lau], A535
- lack of effect on M-3-glucuronidation of morphine [Merrell, Wood, Jackson, Shay & Wood], A295
- mechanism of action of  $\alpha_1$ -adrenoceptor agonists in sensitization of heart by [Hayashi, Sumikawa, Tashiro & Yoshiya], A56
- morphine and, synergistic interaction of, in vitro [Puig, Warner, Tang, Lovitz & Turndorf], A411
- myocardial beta-adrenoceptor density decreased by, in dogs, as assessed by positron emission tomography [Maze, Marty, Seto, Crouzel, Valloise, Crouzel, Lancon & Syrota], A55
- $\text{N}_2\text{O}$  and, comparison of sufentanil and fentanyl with, for total hip arthroplasty in elderly patients [Gauzit, Marty, Couderc, Bouyet, Flaischler & Desmonts], A120
- phospholipase  $\text{A}_2$  and, synergistic hemolysis of human red blood cells by, dantrolene antagonism of [Fletcher, Kistler, Rosenberg, Michaux & Tripoliis], A298
- plasma atrial natriuretic peptide and angiotensin II concentrations during anesthesia with, in rat [Hoffman, Phillips & Kimura], A320
- prejunctional effects of, in man and cat [Stanec & Baker], A336
- presence of amrinone does not attenuate anesthetic-induced myocardial depression in vitro following anesthesia with [Neal, Wolf & Mathew], A91
- protection against spinal cord injury with, in rat [Cole, Shapiro, Drummond & Zivin], A585
- recovery from, RO 15-1788 effects on [Geller, Weinbrum, Halpern, Nevo & Rudick], A422
- regional distribution of cerebral blood flow with [Hansen, Warner, Vust & Todd], A574

- respiratory effects of sedative concentration of, in goat [Popic, Will & Jameson], A328
- subanesthetic concentration of, in severe chronic asthma [Morinet, Benhamou, Herve & Denjean], A543
- teratogenic effects of nitrous oxide prevented by, in rats [Fujinaga, Baden, Yhap & Mazze], A456
- toxicity of, in monolayers of rat hepatocytes [Schieble, Costa, Heffel & Trudell], A316
- verapamil accentuates effects of enflurane more than, on A-V conduction time and incidence of complete A-V block in isolated guinea pig heart [Bosnjak, Marijic, Stowe & Kampine], A61
- verapamil and, on specialized intracardiac conduction [Atlee, Brownlee & Kreigh], A59
- and worsening of regional myocardial dysfunction induced by gradual or abrupt nitrous oxide administration in canine model of critical coronary stenosis [Leone, Philbin, Lehot & Foex], A676
- isoflurane**
- anesthesia with, active thermoregulation during [Sessler, Olofsson & Rubinstein], A405
- anesthesia with, in dog, arrhythmogenic plasma levels of epinephrine during [Hayashi, Sumikawa, Tashiro, Yoshiya & Yamatodani], A57
- anesthesia with N<sub>2</sub>O/O<sub>2</sub> and, healthy surgical patients receiving, pharmacokinetics and pharmacodynamics of BW B1090U in [deBros, Basta, Ali, Wargin & Welch], A609
- BW B1090U infusion requirements in adults during anesthesia with [Powers, Weber, Brandom, Byers, Simpson, Sarnier, Woelfel, Cook, McNulty & Foster], A359
- capillary perfusion during [Goetz, Conzen, Schmidt, Hobbhahn, Peter & Brendel], A7
- cerebral blood flow during carotid endarterectomy and [Young, Prohovnik, Correll, Wang & Lucas], A416
- changes in regional myocardial blood flow and oxygen tension during induced hypotension with, in subhuman primates [Fukunaga, Ito, Iijima, Kubota & Miyamoto], A8
- comparative effects on Ca<sup>++</sup> transport and CA<sup>++</sup> channel release functions in isolated skeletal muscle SR membranes [Nelson & Sweo], A300
- comparative hepatotoxicity of, using isolated perfused rat liver [Mathieu, Ford, Ray & Taylor], A302
- comparison of extent of ischemia following middle cerebral artery occlusion during three induced hypotensive techniques [Cole, Drummond, Shapiro & Zurnow], A571
- conscious and chronically instrumented dogs anesthetized with, hemodynamic effects of UL-FS 49 vs. propranolol in [Wartier, Riley, Gross, Schmeling & Kampine], A48
- diltiazem and, on specialized intracardiac conduction [Atlee, Brownlee & Kreigh], A60
- dipyridamole vs., effects on myocardium supplied by chronically narrowed artery and, in dog [Zimpfer, Mayer & Steinber-eithner], A587
- in dog, hemodynamic and electrocardiographic effects of flecainide with [Pettit & Kapur], A98
- in dog, hypercapnia and hypoxia during anesthesia with, ventilatory responses to, effect of sufentanil infusion on [Abdul-Rasool, Aqleh, Jenkins, Valcke & Ward], A539
- dose-response for BW A938U [Lynam, Caldwell & Miller], A362
- echocardiographic assessment of myocardial contractility during anesthesia with [Mazzei, Dan, Scheller, Dittich & Sahn], A590
- effects of anesthesia and dosage on neuromuscular blockade with BW A938U [Katz, Fragen, Shanks, Dunn, Rudd & Williams], A364
- effects on acetylcholine activated ion channels of [Sokoll & Davies], A410
- effects on cerebral autoregulation [McPherson & Traystman], A576
- effects on cerebral blood flow, intracranial pressure, oxygen consumption and EEG, sevoflurane compared with, in rabbit [Scheller, Tateishi, Drummond & Zornow], A408
- effects on lung metabolism [Watkins & Martin], A296
- effects on spontaneous calcium release from isolated sarcoplasmic reticulum of rabbit white skeletal muscle [Peterson Jr., Baroody & Blanck], A317
- elimination of, from rabbit paralumbar muscle, <sup>19</sup>F NMR spectroscopy study of [Wyrwicz, Conboy & Eisele], A407
- fenentanyl vs., in outpatient diagnostic laparoscopy [Lecky, Kitz, Andrews, Young & Conahan], A433
- genetic variation of responses to, in *C. elegans* [Morgan, Sesdzensky, Cascorbi & Meneely], A382
- halothane and, co-administered, anesthetic potency of, in rat [Skeehan, Larach, Hensley Jr., Schuler & Derr], A379
- halothane vs., and myocardial depressant effects on immature and mature feline papillary muscle function [Wolf, Neal & Mathew], A504
- halothane vs., spontaneous ventilation effects of [Slavchenko, Sandler, Murphy, Vosu & Lau], A535
- hemodynamic effects of, in canine septic shock model [Van der Linden, Gilbert, Engelman & Vincent], A413
- hemodynamic response to, in rat, influence of renal vasodilating infusions of Fenoldopam on [Ebling, Nunez & Field], A101
- hepatic oxygen supply during anesthesia with, in guinea pigs [Gelman & Hursh], A301
- hypotension induced with, regional cerebral blood flow in rats and [Monk, Sperry, Durieux, Walker & Longnecker], A577
- hypotensive action of, resistance to, not due to increase in plasma renin activity [Bernard, Pinaud, Remi & Souron], A381
- induction of myocardial ischemia and [LaMantia, Acampora, Prokop, Ezekowitz, Slavik & Barash], A586
- influence on barbiturate effects on cerebral blood flow [Scheller, Smith, Todd & Drummond], A406
- inhibition of transsarcolemmal calcium influx by [DeTraglia, Komai & Rusy], A50
- ketamine vs., comparative inotropic effects in isolated human atrial tissues [Chang, Luk, Lin & Wei], A92
- MAC for, awake, not affected by analgesic doses of morphine [Gross & Alexander], A375
- MAC for, in dogs, profoundly reduced by azeperexole [Maze, Vickery, Merlone & Gaba], A374
- MAC for, in rat, intrathecal morphine reduces [Drasner, Bernards & Ciriales], A670
- metabolism in obese rats with chronic renal insufficiency [Fish, Rice & Margary], A303
- moderate hypotensive anesthesia with, ischemic heart and [Hobbhahn, Conzen, Goetz, Seidel, Gonschior, Brendel & Peter], A589
- nitrous oxide and, 40 Hz steady state evoked potentials during anesthesia with [Hogan], A402
- nitrous oxide and, interaction of, on regional cerebral ischemia in rat [Baughman, Hoffman, Albrecht & Miletich], A578
- oxygenation of collateral flow dependent myocardium during anesthesia with, coronary perfusion pressure and [Conzen, Hobbhahn, Goetz, Seidel, Gonschior, Peter & Brendel], A588
- potentiation of, induced by acute administration of clonidine, naloxone reversal of [Raybould, Bloor, McIntee & Flacke], A392
- prejunctional effects of, in man and cat [Stanec & Baker], A336

- presence of amrinone attenuates anesthetic-induced myocardial depression in vitro following anesthesia with [Neal, Wolf & Mathew], A91
- and regional cerebral blood flows during deliberate hypotension complicated by hemorrhage [Sperry, Monk, Durieux, Walker & Longnecker], A575
- regional distribution of cerebral blood flow with [Hansen, Warner, Vust & Todd], A574
- regional hemodynamic effects of induced hypotension with [Monk, Sperry, Durieux, Walker & Longnecker], A34
- relative potency of BW B1090 during anesthesia with [Weber, Bandom, Powers, Sarner, Woelfel, Cook, Foster & Weakly], A356
- respiratory effects of sedative concentration of, in goat [Popic, Will & Jameson], A328
- sodium nitroprusside vs., for control of hypertension during thoracic aortic cross-clamping [Godet, Bertrand, Hag, Coriat, Cheour, Kieffer & Viars], A118
- to stop refractory seizures [Kofke, Snider, O'Connell, Young, Ropper, Gray, Johnson, Davis, Woelfel & Gelb], A400
- subanesthetic concentration of, in severe chronic asthma [Morinet, Benhamou, Herve & Denjean], A543
- sufentanil vs., effects on experimental myocardial infarction [Davis, Sidi, McCallum, Rush & Ruiz], A99
- teratogenic effects of nitrous oxide prevented by, in rats [Fujinaga, Baden, Yhap & Mazze], A456
- thiopental and, recovery characteristics following, propofol vs. [Doze, Shafer & White], A398
- thiopental vs., and neurologic outcome following focal ischemia in primates [Milde, Milde, Lanier & Michenfelder], A579
- used to stop status epilepticus, in rats, neuropathologic effects of [Kofe, Towfighi, O'Connell, Derr & Hawkins], A390
- verapamil accentuates effects of enflurane more than, on A-V conduction time and incidence of complete A-V block in isolated guinea pig heart [Bosnjak, Marijic, Stowe & Kampine], A61
- verapamil and, on specialized intracardiac conduction [Atlee, Brownlee & Kreigh], A59
- methoxyflurane**
- genetic variation of responses to, in *C. elegans* [Morgan, Sedsensky, Cascorbi & Meneely], A382
- microdroplets, in man, local anesthetic efficacy of [Kirkpatrick, Cappozzo & Haynes], A254
- phosphoinositide analysis in rats with altered sensitivity to [Haycock & Evers], A378
- sevoflurane**
- anesthesia with, in dog, arrhythmogenic plasma levels of epinephrine during [Hayashi, Sumikawa, Tashiro, Yoshiya & Yamatodani], A57
- effect on  $P_{50}$  and  $PO_2$  measurements [Kambam, Holaday, Horton & Parris], A198
- effects on cerebral blood flow, intracranial pressure, oxygen consumption and EEG, isoflurane compared with, in rabbit [Scheller, Tateishi, Drummond & Zornow], A408
- MAC of, in humans and New Zealand white rabbit [Scheller, Partridge & Saidman], A373
- microsomal formation of hexafluoroisopropanol from [Baker, Suter & Bates], A293
- in newborn swine, anesthetic requirements and circulatory responses [Gallagher, Burrows, Miyasaka, Volgyesi & Lerman], A503
- uptake and elimination via bubble oxygenators [Nussmeier, Moskowitz, Weiskopf, Cohen & Eger II], A197
- neurysm, See under Arteries; Surgery**
- ngiocardiography, See under Monitoring**
- Angiotensin, See under Polypeptides**
- Antagonists**
- benzodiazepine**
- physostigmine**
- efficacy of, vs. RO 15-1788, after midazolam-alfentanil anesthesia in man [Breimer, Hennis, Spierdijk & Bovill], A660
- RO 15-1788**
- efficacy of, vs. physostigmine, after midazolam-alfentanil anesthesia in man [Breimer, Hennis, Spierdijk & Bovill], A660
- for intra-operative arousal during spinal fusion [Godat, Ravussin, Bayer-Berger, Chiolerio & Freeman], A421
- overdose of, absence of ventilatory agonist or inverse agonist effects of [Forster, Crettenand & Morel], A144
- recovery from halothane anesthesia and [Geller, Weinbrum, Halpern, Nevo & Rudick], A422
- reversal of total intravenous anesthesia with midazolam and alfentanil with [Raeder, Hole, Arnulf & Grynne], A659
- sedative and ventilatory effects of [Mora, Torjman & DiGiorgio], A534
- stress response following reversal of sedation with [White, Shafer, Boyle & Doze], A661
- in vitro myocardial effects [Boyle III, White, Rendig], A63
- Antagonists, narcotic**
- naloxone**
- and reversal of potentiation of inhalational anesthesia and hemodynamic changes induced by acute administration of clonidine [Raybould, Bloor, McIntee & Flacke], A392
- Antagonists, neuromuscular relaxants**
- edrophonium**
- and alteration of properties of ion channels activated by acetylcholine [Wachtel], A339
- modeling anticholinesterase reversal of relaxants [Shanks], A616
- neostigmine**
- modeling anticholinesterase reversal of relaxants [Shanks], A616
- respiratory failure produced by, alternative mechanism for [Fleming, Macnamara & Dretchen], A617
- response times to, in elderly [Young, Matteo & Ornstein], A340
- pyridostigmine**
- myocardial ischemia after neuromuscular blockade reversal with [Tse, Bause & Barash], A618
- response times to, in elderly [Young, Matteo & Ornstein], A340
- Antiarrhythmics, See under Heart, arrhythmia**
- Anticholinesterases, See Antagonists, neuromuscular relaxants**
- Anticoagulants, See under Blood**
- Anticonvulsants**
- isoflurane as [Kofke, Snider, O'Connell, Young, Ropper, Gray, Johnson, Davis, Woelfel & Gelb], A400
- neuropathologic effects of, in rats [Kofke, Towfighi, O'Connell, Derr & Hawkins], A390
- phenytoin**
- does not interfere with atracurium pharmacokinetics and pharmacodynamics [deBros, Okutani, Lai, Lawrence & Basta], A607
- Antidiuretic hormone, See under Hormones**
- Antiemetics, See under Vomiting**
- Anxiety, See under Psychologic responses**
- Aortic surgery, See under Surgery, cardiovascular**
- Apnea, See under Ventilation**
- Aprotinin, See under Blood, anticoagulants**
- Arrhythmia, See under Complications; Heart**
- Arteries**
- aneurysm**
- rupture of, subarachnoid hemorrhage due to, cerebral vasospasm after, curative treatment with intravenous nimodipine for [Guggiari, Taquai, Philippon & Viars], A584

carotid  
  rapid, bedside, and noninvasive assessment of brain death for organ transplant [Lamer, Pilorget, Payen, Beloucif, Moreau & Echter], A148  
pulmonary, *See under Lung*  
Asthma, *See under Lung*  
ATP, *See Metabolism, adenosine triphosphate*  
Atracurium, *See under Neuromuscular relaxants*  
Atria, *See under Heart*  
Atrioventricular block, *See under Heart*  
Atropine, *See under Parasympathetic nervous system; Premedication*  
Autonomic nervous system, *See Parasympathetic nervous system; Sympathetic nervous system*  
Autotransfusion, *See under Transfusion*  
A-V block, *See Heart, atrioventricular block*  
Axillary block, *See under Anesthetic techniques, regional*  
Azathioprine, *See under Pharmacology*

## B

Barbiturates, *See under Hypnotics*  
Baroreceptors, *See under Receptors, pressoreceptors*  
Baroreflex, *See under Reflexes*  
Benzodiazepine antagonists, *See under Antagonists*  
Benzodiazepines, *See under Anesthetics, intravenous; Hypnotics*  
Beta-adrenergic blockade, *See under Sympathetic nervous system*  
Beta-adrenergic receptors, *See under Sympathetic nervous system*  
Biotransformation (drug)  
  age factors  
    and cerebrospinal fluid laudanosine kinetics in children [Harris, Stirt, Broadus & Cook], A506  
  atracurium and inhibition of plasma cholinesterase and degradation in vitro [Kupferberg, James & Seals], A602  
  BW B1090U, in vitro metabolism of [Cook, Stiller, Chakravorti, Welch & Brandom], A610  
  decomposition of sodium nitroprusside by blood components [Bates & Baker], A307  
  effects of pH on oxidation rate of epinephrine [Parnass, Baughman, Miletich & Albrecht], A280  
fluorometabolites  
  isoflurane metabolism in obese rats with chronic renal insufficiency [Fish, Rice & Margary], A303  
  microsomal formation of hexafluoroisopropanol from sevoflurane [Baker, Suter & Bates], A293  
halothane anesthesia has no effect on M-3-glucuronidation of morphine [Merrell, Wood, Jackson, Shay & Wood], A295  
microsomes  
  and formation of hexafluoroisopropanol from sevoflurane [Baker, Suter & Bates], A293  
  liver, and purified cytochrome P-450, characterization of halothane oxidation by, using gas chromatographic-mass spectrometry assay [Waskell, Konopka, Gruenke & Koop], A314  
  pharmacokinetics of atracurium and metabolites in normal and renal failure patients [van den Brom, Wierda & Agoston], A606  
  quantitation of electrophilic metabolites formed from atracurium in vivo [Pandya, Nigrovic, Gallup & Fry], A603  
  in vitro cyanide release from sodium nitroprusside in different intravenous solutions [Ikeda, Schweiss, Frank & Homan], A308  
Blood  
  anticoagulants  
    aprotinin (Trasylol)  
      high dose, reduction in postoperative blood loss in patients

    having open heart reoperations using [Royston & Bidstrup], A23  
  heparin  
    prolonged PT and PTT despite adequate heparin neutralization following cardiopulmonary bypass in children [Oh, Bell & Hughes], A22  
coagulation  
  adequate anticoagulation during hypothermic cardiopulmonary bypass independently determined by activated coagulation time [Haddon, Gravlee, Bean, Miller & Angert], A26  
  changes in, following cardiopulmonary bypass, thrombelastograph and Sonoclot signature monitoring of [Newland, Chapin, Hurlbert, Kennedy & Newland], A199  
  intraoperative changes in, during liver transplantation in children [Kang, Borland, Picone & Martin], A525  
  after open heart surgery, use of thrombelastograph to predict and assess [Logas, Spiess, Hughes, McCarthy, Jaimovich & Ivanovich], A142  
protamine  
  adverse effects of, mediation of by thromboxane A<sub>2</sub> and prostaglandin F<sub>2α</sub> [Hobbbahn, Conzen, Zenker, Goetz, Brendel & Peter], A25  
  mechanisms of action of inotropic effects on isolated mammalian cardiac muscles [Housmans & Ferguson], A24  
  reduction in postoperative blood loss in patients having open heart reoperations using high dose aprotinin (Trasylol) [Royston & Bidstrup], A23  
erythrocytes  
  deformability, alteration of, during extracorporeal bypass with membrane oxygenator vs. bubble oxygenator [Hakoshima, Goto, Abe, Benson, Moran & Arakawa], A21  
  volume, circulating, measurement of [Hansen, Goetz, Conzen, Hobbbahn & Peter], A207  
hemodilution  
  comparison of effects of three methods for intraoperative blood conservation on systemic hemodynamics and blood replacement [Fahmy & Sunder], A134  
  with isotonic crystalloid and colloid solutions, following cryogenic brain injury, acute cerebral effects of [Zornow, Scheller, Todd & Moore], A583  
  normovolemic, in anesthetized patients with coronary artery disease, effects on hemodynamic and LV function of [Van Der Linden, Baron, Philip, Arthaud, Coriat, Bertrand, Vicaut, Debat & Viars], A135  
  normovolemic, in patients with coronary artery disease, hemodynamic and metabolic responses to recovery in [Van Der Linden, Baron, Philip, Arthaud, Bertrand, Coriat, Vicaut, Debat & Viars], A79  
hemoglobin  
  crosslinked, oxygen offloading, plasma retention, and metabolic fate of [Keipert, Verosky & Triner], A653  
  desaturation, time course of, during immediate postanesthetic period in children [Motoyama, Borland & Mutich], A508  
hemolysis  
  synergistic, of human red blood cells, by halothane and phospholipase A<sub>2</sub>, dantrolene antagonism of, model for malignant hyperthermia [Fletcher, Kistler, Rosenberg, Michaux & Tripolitis], A298  
leukocytes  
  polymorphonuclear, function activation of, in patients with adult respiratory distress syndrome [Rossignon, Khayat, Royer, Rouby, Jacquillat & Viars], A647  
  role in proteolytic enzyme induced lung injury model [Toung, Sendak, Rosenfeld, Bulkley & Traystman], A646



- loss, *See also* Hemorrhage**  
 comparison of effects of three methods for intraoperative blood conservation on systemic hemodynamics and blood replacement [Fahmy & Sunder], A134  
 effects of graded hemorrhagic hypotension on cerebral blood flow, blood volume, and mean transit time in dog [Ferrari, Wilson, Hartmann, Rogers & Traystman], A85  
 enflurane alters compensatory humoral and hemodynamic responses to [Zimpfer, Mayer, Kotai & Placheta], A53  
 hemorrhagic hypovolemia, intracranial hypertension and, esmolol effect on cerebral blood flow during [Bunegin, Albin & Gelineau], A424  
 high vs. low inflation pressures of MAST in severe hemorrhagic shock [Riou, Barriot, Bodenau & Viars], A204  
 postoperative, reduction in, in patients having open heart reoperations using high dose aprotinin (Trasylol) [Royston & Bidstrup], A23  
 severe, adrenal medullary response evoked by, preservation of, by receptor agonists [Gaumann, Yaksh, Tyce & Lucas], A677
- lymph**  
 general anesthesia reduces flow rate [Allen, Drake, Gabel & Laine], A137
- methemoglobinemia**  
 effects on pulse oximetry and mixed venous oximetry [Barker, Tremper, Hyatt & Zaccari], A171
- oxyhemoglobin dissociation**  
 oxygen offloading, plasma retention, and metabolic fate of cross-linked hemoglobin [Keipert, Verosky & Triner], A653
- platelets**  
 does amrinone-associated thrombocytopenia occur with short-term administration [Hines & Barash], A599  
 influence of epidural anesthesia with bupivacaine on, and correlation with plasma bupivacaine concentration [Bovill & Odoo], A273  
 microaggregates, interactions with pulmonary capillary pressure and arachidonic acid derivatives in acute lung injury [Cope, Taylor, Longenecker, Fontenelle & Miller], A652
- replacement, *See also* Transfusion**  
 comparison of effects of three methods for intraoperative blood conservation on [Fahmy & Sunder], A134
- stored, *See under* Transfusion**
- volume**  
 control of, by atrial natriuretic factor, during cardiac surgery by [Wood, Bullington, Hammon, Imada & Inagami], A18  
 effects of graded hemorrhagic hypotension on, in dog [Ferrari, Wilson, Hartmann, Rogers & Traystman], A85  
 during hypercapnia and hypercapnic hypoxia in dogs [Hoka, Arimura, Bosnjak & Kampine], A105
- Blood flow, *See under individual organs***
- Blood pressure, *See also under* Measurement techniques; Monitoring**  
**drug effects**  
 of BW A938U vs. pancuronium on [Murray, Mehta, Forbes, Choi, Sokoll, Gergis, Krol & Abou-Donia], A367  
 of BW B1090U during nitrous oxide-oxygen-narcotic anesthesia [Forbes, Choi, Mehta, Murray, Sokoll, Gergis, Douglas & Abou-Donia], A360  
 of morphine, during hypothermia [Puig, Bansinath, Vargas, Lovitz & Turndorf], A312  
 heart rate relationship to, as clinical index of baroreceptor function [Koushanpour, Behnia, Sinclair & Chang], A76
- hypertension**  
 central venous, pulmonary edema formation following endotoxemia worsened by, in sheep [Allen, Drake, Gabel & Laine], A125  
 intraoperative, esmolol for treatment of [Reves, Croughwell, Hawkins & Jacobs], A33  
 intraoperative, intravenous nicardipine for treatment of [Begon, Dartayet, Edouard, David & Samii], A39  
 intravenous labetalol for reduction of, following myocardial revascularization [Prough, Mills, Kiger & Bowton], A136  
 in post-anesthesia recovery room [Shapiro, McCarthy, Litwack, Carroll, Murphy & Ivankovich], A45  
 postoperative, nicardipine vs. trinitrin for treatment of, effects on hemodynamics and left ventricular function [Benammar, Coriat, Houissa, Bruere, Brusset, Hag & Viars], A139  
 pregnancy induced, model of, in pregnant ewe [Joyce, Longmire, Tessem, Baker & Jones], A455
- pulmonary**  
 development of regional myocardial ischemia during, when right coronary artery stenosis is present [Priebe], A6  
 persistent, of newborn, pulmonary function abnormalities in patients with [Shutack, Fox, Shaffer & Moonjian], A487  
 porcine model of, effects of prostaglandin E<sub>1</sub>, isoproterenol, prostacyclin, and nifedipine in [Prielipp, Pearl, McLean & Rosenthal], A154  
 in sheep, propylene glycol produces [Pearl & Siegel], A324  
 vasoconstrictor model of, in sheep, vasodilator therapy in [Prielipp, Pearl & Rosenthal], A104  
 superior vena caval, pleural effusions can be caused by [Allen, Drake, Gabel & Laine], A138
- hypotension**  
 hemorrhagic, graded, effects on cerebral blood flow, blood volume, and mean transit time in dog [Ferrari, Wilson, Hartmann, Rogers & Traystman], A85  
 isoflurane action, resistance to, not due to increase in plasma renin activity [Bernard, Pinaud, Remi & Souron], A381  
 noxious stimuli and, halothane and, in rat [Gibbs, Larach, Skeehan & Schuler], A412
- measurement**  
 comparison between radial arterial and central aortic pressure-volume relations [Hillel, Thys, Goldman & Kaplan], A107  
 prediction of myocardial ischemia by pressure-rate ratio and diastolic time during coronary artery bypass surgery [Shiraki, Hong, Jo, Strom, Goldiner & Oka], A595  
 response to epinephrine test dose in beta-blocked subjects [Hom, Johnson & Mulroy], A268
- Body temperature, *See under* Hyperthermia; Hypothermia; Temperature**
- Brachial plexus block, *See under* Anesthetic techniques, regional**
- Brain**  
**blood flow**  
 abnormal responses of, to vasomotor stimuli, intracranial tumors causing [Stump, Bertels & Prough], A415  
**autoregulation**  
 effects of isoflurane on [McPherson & Traystman], A576  
 during hypothermic cardiopulmonary bypass [Brusino, Reves, Prough, Stump & Croughwell], A10  
 barbiturate effects on, isoflurane and [Scheller, Smith, Todd & Drummond], A406  
 during cardiopulmonary resuscitation in swine, effect of compression rate and duty cycle on [Koehler, Dean, Schleien, Berkowitz, Michael, Atchison, Rogers & Traystman], A152  
 during carotid endarterectomy [Young, Prohovnik, Correll, Wang & Lucas], A416  
 cerebral metabolic rate for oxygen not dependent on cerebral oxygen delivery in critically ill patients [Bertels, Prough, Stump & Hinshelwood], A121  
 effects of graded hemorrhagic hypotension on, in dog [Ferrari, Wilson, Hartmann, Rogers & Traystman], A85

- effects of isoflurane on [McPherson & Traystman], A576
- effects of pump flow reduction during hypothermic cardiopulmonary bypass [Prough, Stump, Rogers, Phipps & Hinshelwood], A11
- effects of sufentanil on, in dogs [Milde & Milde], A570
- effects of superoxide dismutase following global cerebral ischemia [Snelling, Ackerman, Dean, North & Traystman], A153
- esmolol effect on, during intracranial hypertension and hemorrhagic hypovolemia [Bunegin, Albin & Gelineau], A424
- evidence against central chemoreceptor control with hypoxia [Miyabe, Koehler, Jones Jr., Gurtner & Traystman], A84
- influence of perfusion flow rates during hypothermic cardiopulmonary bypass [Murkin, Farrar, Cleland, MacDonald & Mayer], A9
- middle cerebral artery occlusion, extent of ischemia following, comparison of, during three induced hypotensive techniques [Cole, Drummond, Shapiro & Zornow], A571
- middle cerebral artery occlusion, in cat, hyperglycemia decreases neuronal ischemic changes after [Zasslow, Pearl, Shuer, Lieberman, Steinberg & Larson Jr.], A581
- during nitroprusside-induced hypotension to less than 50 mm Hg [Pinaud, Souron, Gazeau, Chatal & Lajat], A36
- nitrous oxide effects on, in rabbit, effects of anesthetics and PaCO<sub>2</sub> on [Kaieda, Todd, Cook & Warner], A409
- phenylephrine vs. epinephrine and, during and following cardiopulmonary resuscitation in dogs [Schleien, Koehler, Berkowitz, Dean, Gervais, Michael, Rogers & Traystman], A650
- rapid, bedside, and noninvasive assessment of brain death for organ transplant [Lamer, Pilorget, Payen, Beloucif, Moreau & Echter], A148
- reactivity of, to carbon dioxide, preservation of, in clinical sepsis [Bertels, Prough, Stump, Phipps & Chappell], A414
- regional, during deliberate hypotension complicated by hemorrhage [Sperry, Monk, Durieux, Walker & Longnecker], A575
- regional, in rats, induced hypotension and [Monk, Sperry, Durieux, Walker & Longnecker], A577
- regional distribution of, with halothane and isoflurane [Hansen, Warner, Vust & Todd], A574
- response to increasing doses of epinephrine during CPR in infant swine [Berkowitz, Koehler, Schleien, Dean, Gervais, Michael, Rogers & Traystman], A649
- responsiveness to PaO<sub>2</sub> is preserved during hypothermic cardiopulmonary bypass [Rogers, Stump, Prough, Angert & Walenhaupt], A12
- sevoflurane effects are similar to those of isoflurane on, in rabbit [Scheller, Tateishi, Drummond & Zornow], A408
- somatosensory evoked potentials and, relationship between, during graded incomplete ischemia in goats under general anesthesia [Kochs & Schulte am Esch], A403
- electroencephalography**
- chronically instrumented rat model for combined pharmacokinetic and CNS pharmacodynamic assessment of anesthetics [Ebling, Burm, Field & Stanski], A674
- nitrous oxide effects on, in rabbit, effects of anesthetics and PaCO<sub>2</sub> on [Kaieda, Todd, Cook & Warner], A409
- sevoflurane effects are similar to those of isoflurane on, in rabbit [Scheller, Tateishi, Drummond & Zornow], A408
- evoked potentials**
- and time course of lorazepam induced auditory amnesia [Samra, Bradshaw, Pandit, Moore & Papanicolaou], A420
- injury**
- comparison of effects of isoflurane and thiopental on neurologic outcome following focal ischemia in primates [Milde, Milde, Lanier & Michenfelder], A579
- cryogenic, acute cerebral effects of hemodilution with isotonic crystalloid and colloid solutions following [Zornow, Scheller, Todd & Moore], A583
- cryogenic, effect of hypertonic lactated Ringers solution on cerebral edema and intracranial pressure following [Zornow, Scheller, Shackford, Moore & Bloom], A654
- following global cerebral ischemia, effects of superoxide dismutase on [Snelling, Ackerman, Dean, North & Traystman], A153
- hyperglycemia decreases neuronal ischemic changes after middle cerebral artery occlusion in cat [Zasslow, Pearl, Shuer, Lieberman, Steinberg & Larson Jr.], A581
- recovery after clinically relevant cardiac arrest of 20 min with cardiopulmonary bypass vs. cardiopulmonary resuscitation, in dogs [Angelos, Reich, Safar, Stezoski & Houghton], A147
- reduced CSF uridine in patients with [Rosner, Mueller, Ghi, Hunt & Coley], A429
- regional cerebral ischemia with methohexital, midazolam and etomidate, neurologic outcome following [Baughman, Hoffman, Miletich & Albrecht], A582
- temporary focal ischemia, continuous infusion of lidocaine in [Shokunbi, Gelb, Miller & Wu], A580
- intracranial pressure**
- effect of hypertonic lactated Ringers solution on, following cryogenic brain injury [Zornow, Scheller, Shackford, Moore & Bloom], A654
- esmolol effect on cerebral blood flow during intracranial hypertension and hemorrhagic hypovolemia [Bunegin, Albin & Gelineau], A424
- sevoflurane effects are similar to those of isoflurane on, in rabbit [Scheller, Tateishi, Drummond & Zornow], A408
- ischemia**
- extent of, following middle cerebral artery occlusion during three induced hypotensive techniques, comparison of [Cole, Drummond, Shapiro & Zornow], A571
- focal, in primates, comparison of effects of isoflurane and thiopental on neurologic outcome following [Milde, Milde, Lanier & Michenfelder], A579
- focal, temporary, continuous infusion of lidocaine in [Shokunbi, Gelb, Miller & Wu], A580
- global, effects of superoxide dismutase on neurologic injury following [Snelling, Ackerman, Dean, North & Traystman], A153
- graded, incomplete, in goats under general anesthesia, relationship between cerebral blood flow and somatosensory evoked potentials during [Kochs & Schulte am Esch], A403
- hyperglycemia decreases neuronal changes after middle cerebral artery occlusion in cat [Zasslow, Pearl, Shuer, Lieberman, Steinberg & Larson Jr.], A581
- with methohexital, midazolam and etomidate, neurologic outcome following [Baughman, Hoffman, Miletich & Albrecht], A582
- in rat, interaction of nitrous oxide and isoflurane on [Baughman, Hoffman, Albrecht & Miletich], A578
- regional, neurological outcome in aged rats following [Hoffman, Baughman, Miletich & Albrecht], A428
- localization of sites that may play role in alfentanil-induced muscle rigidity in rat [Weinger, Cline, Blasco, Smith & Koob], A384
- metabolism**
- effect of hyperglycemia on [Sieber, Derrer, Saudek & Traystman], A572
- effects of sufentanil on, in dogs [Milde & Milde], A570
- not dependent on cerebral oxygen delivery in critically ill patients [Bertels, Prough, Stump & Hinshelwood], A121

**oxygen consumption**

- cerebral metabolic rate for oxygen not dependent on cerebral oxygen delivery in critically ill patients [Bertels, Prough, Stump & Hinshelwood], A121
- effect of hypoglycemia on [Sieber, Derrer, Saudek & Traystman], A572
- effects of sufentanil on, in dogs [Milde & Milde], A570
- influence of perfusion flow rates during hypothermic cardiopulmonary bypass [Murkin, Farrar, Cleland, MacDonald & Mayer], A9
- during nitroprusside-induced hypotension to less than 50 mm Hg [Pinaud, Souron, Gazeau, Chatal & Lajat], A36
- nitrous oxide effects on, in rabbit, effects of anesthetics and PaCO<sub>2</sub> on [Kaieda, Todd, Cook & Warner], A409
- sevoflurane effects are similar to those of isoflurane on, in rabbit [Scheller, Tateishi, Drummond & Zornow], A408

**oxygenation**

- in critically ill patients, cerebral metabolic rate for oxygen not dependent on [Bertels, Prough, Stump & Hinshelwood], A121

**Breathing, *See* Ventilation**

Bretylium, *See under* Sympathetic nervous system, sympatholytic agents

Bronchial catheters, *See under* Equipment, catheters

Bronchopleural fistula, *See under* Complications, fistula

Bubble oxygenator, *See under* Surgery, cardiovascular, oxygenator

Bupivacaine, *See under* Anesthetics, local

Buprenorphine, *See under* Analgesics, narcotic

Butamben, *See under* Anesthetics, local

Butorphanol, *See under* Analgesics, narcotic

BW A938U, *See under* Neuromuscular relaxants

BW B1090U, *See under* Neuromuscular relaxants

Bypass surgery, *See under* Surgery

**C**

CABG, *See* Surgery, coronary artery bypass

Calcium, *See under* Ions

Calcium channel blockers, *See under* Ions

Calorimetry, *See under* Measurement techniques

**Cancer**

- influence of preoperative chest x-rays on perioperative management of patients with [Weibman, Shah & Bedford], A332

- intractable pain in, morphine injections in cisterna magna for [Schoeffler, Haberer, Monteillard & Bouctard], A246

- metastatic, epidural butamben for treatment of pain with [Shulman], A245

- preoperative chest x-rays and [Weibman, Shah & Bedford], A159

Cannulation, *See under* Veins

Capnography, *See under* Equipment

Captopril, *See under* Pharmacology

Carbamazepine, *See under* Pharmacology

Carbon dioxide, *See also under* Monitoring; Ventilation

**absorption**

- during laparoscopy, hazard of [de Sousa & Tyler], A476
- valveless coaxial anesthesia breathing system with [Nicodemus & Schubert], A211

**blood levels**

- clinical sepsis and [Bertels, Prough, Stump, Phipps & Chappell], A414

- peripheral venous and arterial, similarities between, in anesthetized children [Jordan & Jordan], A528

**elimination**

- during total cardiopulmonary bypass in infants and children [Larach, Hensley, High, Williams & Snider], A19

**hypercarbia**

- attenuation of, by sleep deprivation, in man [Ochiai, Motoyama, Winter & Walczak], A331

- in dogs, regional venous outflow, systemic blood volume and sympathetic nerve activity during [Hoka, Arimura, Bosnjak & Kampine], A105

- effects on liver surface PO<sub>2</sub> in dog [Okazaki, Okutsu, Numata & Fukunaga], A88

- ventilatory responses to, effect of sufentanil infusion on, during isoflurane anesthesia in dogs [Abdul-Rasool, Aqleh, Jenkins, Valcke & Ward], A539

**hypocarbica**

- effects of hyperventilation in infants after repair of congenital heart disease [Wessel, Hickey & Hansen], A526

- effects on liver surface PO<sub>2</sub> in dog [Okazaki, Okutsu, Numata & Fukunaga], A88

- effects on nitrous oxide responses in rabbit of [Kaieda, Todd, Cook & Warner], A409

**measurement**

- end-tidal, in infants and children ventilated with Sechrist infant ventilator [Badgwell, McLeod, Lerman & Creighton], A511

**ventilatory response**

- following epidural sufentanil in children [Benlabeled, Ecoffey, Levron, Flaisler & Gross], A517

Carbon dioxide electrodes, *See under* Measurement techniques, electrodes

Cardiac output, *See under* Heart; Measurement techniques

Cardiopulmonary bypass, *See under* Surgery

Cardiopulmonary resuscitation, *See under* Heart

Cardiovascular anesthesia, *See under* Anesthesia

Cardiovascular surgery, *See under* Surgery

Carotid artery, *See under* Arteries

Carotid endarterectomy, *See under* Surgery

Catecholamines, *See under* Sympathetic nervous system

Catheters, *See under* Equipment

Caudal anesthesia, *See under* Anesthetic techniques, peridural

Central venous pressure, *See* Veins, venous pressure

Cerebral blood flow, *See* Brain, blood flow

**Cerebrospinal fluid****composition**

- content and quality of pseudocholinesterase in [Kambam, Horton, Parris, Hyman, Berman & Sastry], A252

- laudanose kinetics in children [Harris, Stirt, Broaddus & Cook], A506

- uridine in, in head injury patients [Rosner, Mueller, Ghia, Hunt & Coley], A429

Cervical anesthesia, *See under* Anesthetic techniques, regional

Cesarean section, *See under* Anesthesia, obstetric

Chemoreceptors, *See under* Receptors

Children, *See* Age factors; Anesthesia, pediatric; Surgery, pediatric

Chloralose, *See under* Anesthetics, intravenous

2-Chloroadenosine, *See* Pharmacology, adenosine

Chloroform, *See under* Anesthetics, volatile

Chloroprocaine, *See under* Anesthetics, local

Cholinesterase, *See under* Enzymes

Cimetidine, *See under* Histamine, antagonists

Circuits, *See under* Equipment

Cirrhosis, *See under* Liver

Clonidine, *See under* Pharmacology

Closed circuits, *See under* Equipment, circuits

Closing capacity, *See under* Lung, capacity

Coagulation, *See under* Blood

Colloid, *See under* Fluid balance

Compliance, *See under* Veins

## Complications

### accidents

structured mishap analysis using problem-solving model [Gaba, DeAnda & Parsons], A468

### arrhythmia

effect of two interventions on rate of [Cooper, Cullen, Nemeskal, Gevirtz & Hoaglin], A466

during pulmonary artery catheterization, patient's position influences incidence of [Keusch, Winters & Thys], A184

survey of 3,244 consecutive admissions to post-anesthesia recovery room at university teaching hospital [Gewolb, Hines & Barash], A471

### convulsions

clinical induction with opiates and [Smith, Bickford, Sanford Jr., Dec-Silver & Blasco], A385

detection using processed EEG [Benthuyssen, Fung, Smith & Magliozzi], A214

refractory, isoflurane stops [Kofke, Snider, O'Connell, Young, Ropper, Gray, Johnson, Davis, Woelfel & Gelb], A400

status epilepticus, in rats, anesthetics used to stop, neuropathologic effects of [Kofke, Towfighi, O'Connell, Derr & Hawkins], A390

### death

in blunt trauma, adequacy of ASA physical status classification in prediction of [Koch, McLellan, Wortzman, Bertram & Szalai], A482

increased operative stress and [Roizen, Lampe, Benefiel, Sohn, Lichtor, Smith, Stoney, Ehrenfeld, Goldstone, Reilly, Thisted, Eger II & Hamilton], A1

predictors of, in post cardiopulmonary bypass period [Ossey, Hawkins, Reves & McIntyre], A596

risk of surgery and anesthesia 1979 and 1983 [Lichtor, Roizen & Lane], A465

### diagnosis, x-ray

chest, preoperative, influence on perioperative management of cancer patients [Weibman, Shah & Bedford], A332

preoperative, for cancer patients [Weibman, Shah & Bedford], A159

### edema

#### cerebral

effect of hypertonic lactated Ringers solution on, following cryogenic brain injury [Zornow, Scheller, Shackford, Moore & Bloom], A654

#### pulmonary

air embolism induced, effects of regional hypoxia on [Overand, Eisenstein, Bishop & Cheney], A550

asymmetric, canine, treated with PEEP, does hypothermia improve oxygen delivery in [Johnston, Vinten-Johansen, Strickland & Bowton], A155

oleic acid-induced, canine, comparison of two formulas for calculating alveolar oxygen tension in [Johnston, Vinten-Johansen, Bowton, Strickland & Royster], A110

worsened by central venous hypertension following endotoxemia in sheep [Allen, Drake, Gabel & Laine], A125

### encephalopathy

after cardiopulmonary bypass [Nussmeier & Fish], A14

### fistula

bronchopleural, in acute respiratory failure, comparison of high frequency jet ventilation with conventional ventilation for [Bishop, Benson, Sato & Pierson], A116

foreign body implantation from epidural catheters [Lachica, Bendon, Ruebusch, Thompson & Santos], A202

### headache

postspinal, treatment with epidural dextran 40 [Aldrete, Barrios-Alarcon, Tapia, penas & Lavine], A221

### hematoma

from right internal jugular vs. left subclavian vein cannulation, in training program [Neal, Wallfisch & Arens], A222

### hypertension

effect of two interventions on rate of [Cooper, Cullen, Nemeskal, Gevirtz & Hoaglin], A466

following intracranial aneurysm clipping [Domino & Cullen], A573

postcarotid endarterectomy, prevention with IV nisoldipine, hemodynamic and hyperadrenergic response to recovery [Braz, Coriat, Bertrand, Cheour, Landau, Mouquet & Viers], A140

postcarotid endarterectomy, role of epinephrine, norepinephrine and renin and treatment with labetalol in [Goldberg, Seltzer, Azad, Smullens, Marr & Larijani], A569

postoperative, intravenous nicardipine for [Casar, Pool, Chelly, Barton, Turlapaty & Laddu], A141

survey of 3,244 consecutive admissions to post-anesthesia recovery room at university teaching hospital [Gewolb, Hines & Barash], A471

during thoracic aortic cross-clamping, isoflurane vs. sodium nitroprusside for control of [Godet, Bertrand, Hag, Coriat, Cheour, Kieffer & Viers], A118

### hypervolemic hyponatremia syndrome

prevention by continuous monitoring [Watkins-Pitchford & Learned], A216

### hypotension

aggressive application of PEEP and [Carroll, Tuman, Braverman, Logas & Ivankovich], A114

effect of two interventions on rate of [Cooper, Cullen, Nemeskal, Gevirtz & Hoaglin], A466

increased intraoperative cardiovascular morbidity in diabetics with autonomic neuropathy [Burgos, Asiddao, Ebert, Pattison & Kampine], A66

survey of 3,244 consecutive admissions to post-anesthesia recovery room at university teaching hospital [Gewolb, Hines & Barash], A471

### intubation, endotracheal

pulse oximetry in detection of endobronchial intubation [Barker, Tremper, Hyatt, Zaccari & Thiaure], A170

long term sterility of diluted or pre-drawn solutions of succinylcholine, ephedrine, thiopental, and curare [Mayweather, Santos, Juneja & Stanek], A160

### nerve damage

after epidural anesthesia for extracorporeal shock wave lithotripsy [Korbon, Lander, Jenkins, Lippert & Carey], A228

inflicted by hypoxia in vitro, role of lactic acidosis in [Rigor, Dong, Brahen, West & Schurr], A322

local anesthetics selectively damage Schwann cells of unmyelinated nerve fibers [Myers, Kalichman & Powell], A276

### neurologic

after clinically relevant cardiac arrest of 20 min with cardiopulmonary bypass vs. cardiopulmonary resuscitation, in dogs [Angelos, Reich, Safar, Stezoski & Houghton], A147

effects of superoxide dismutase following global cerebral ischemia [Snelling, Ackerman, Dean, North & Traystman], A153

after epidural anesthesia for extracorporeal shock wave lithotripsy [Korbon, Lander, Jenkins, Lippert & Carey], A228

### obesity

marked hypoxemia after gastropasty due to disorders of breathing in REM sleep [Knill, Moote, Rose & Skinner], A552

morbidity, does atropine inhibit effect of metoclopramide pretreatment on gastric contents in [Goldberg, Norris, Larijani, Marr & Seltzer], A289

pharmacodynamics of vecuronium and atracurium in [Weinstein, Matteo, Ornstein, Goldstoft & Thal], A346

rats with chronic renal insufficiency and, isoflurane metabolism in [Fish, Rice & Margary], A303

**pneumonia**  
diagnosis in mechanically ventilated patients, evaluation of new protected bronchial catheter for [Rossignon, Rouby, Belbachir, Nicolas, Martin de Lassale & Viars], A123  
increased operative stress and [Roizen, Lampe, Benefiel, Sohn, Lichtor, Smith, Stoney, Ehrenfeld, Goldstone, Reilly, Thisted, Eger II & Hamilton], A1  
risk of, prevention of stress bleeding and, in ventilated ICU patients [Tryba], A124  
prognostic value of preoperative noninvasive Doppler measurements of cardiac index [Belani & Estrin], A122

**renal**  
enzyme marker of, pulsatile bypass and [Suntay, Howie, McSweeney, Galbraith & Smith], A15  
increased operative stress and [Roizen, Lampe, Benefiel, Sohn, Lichtor, Smith, Stoney, Ehrenfeld, Goldstone, Reilly, Thisted, Eger II & Hamilton], A1  
of repeated epidural anesthesia in cat [Korbon, Grosslight, Norley & Herman], A229  
resistance to fluid flow can detect venous catheter infiltration [Philip], A194

**respiratory depression**  
effect of two interventions on rate of [Cooper, Cullen, Nemeskal, Gevirtz & Hoaglin], A466  
from epidural morphine, prevention of, in post-thoracotomy patients, with nalbuphine hydrochloride [Doran, Baxter, Samson, Penning & Dube], A248  
from fentanyl, infant sensitivity to [Hertzka, Fisher, Gauntlett & Spellman], A512  
morphine-induced, reversal of, during fourth ventricular administration of butorphanol or nalbuphine, in awake dogs [Vadeboncouer, Pelligrino & Albrecht], A542  
in premature infants, use of caffeine in prevention of [Welborn, de Soto, Hannallah, Fink & Boeckx], A507  
principal areas of risk and implications for anesthetic care [Caplan, Posner, Ward & Cheney], A469  
produced by neostigmine, alternative mechanism for [Fleming, Macnamara & Dretchen], A617  
survey of 3,244 consecutive admissions to post-anesthesia recovery room at university teaching hospital [Gewolb, Hines & Barash], A471  
study of spontaneous and purposeful movement as predictor of post-operative recall during fentanyl/nitrous oxide/diazepam anesthesia [Stolzy, Couture & Edmonds Jr.], A376

**thrombosis**  
droperidol abolishes acute thrombus formation in stenosed dog coronary arteries [Bertha, Sill, Nugent & Folts], A78

**trauma**  
retrograde tracheal intubation in [Riou, Barriot, Bodenan & Viars], A130

**ulcers**  
prevention in ventilated ICU patients, risk of nosocomial pneumonia and [Tryba], A124

**Computerized tomography, See under Measurement techniques, tomography**

**Computers, See under Equipment; Measurement techniques**

**Conduction, See under Heart; Nerve**

**Conduction anesthesia, See Anesthetic techniques, regional**

**Congenital defects, See under individual organs**

**Contractility, See under Heart; Muscle, skeletal**

**Contrast echocardiography, See under Measurement techniques, echocardiography**

**Convulsions, See under Complications**

**Cooling, See under Temperature**

**Coronary artery bypass, See under Surgery**

**Coronary artery disease, See under Heart**

**Coronary blood flow, See under Heart**

**Coronary occlusion, See under Heart**

**CPR, See Heart, cardiopulmonary resuscitation**

**Craniotomy, See under Surgery**

**Critical care, See Intensive care**

**Crystalloid, See under Fluid balance**

**Curare, See Neuromuscular relaxants, d-tubocurarine**

**CVP, See Veins, venous pressure**

**Cyanosis, See under Oxygen**

**Cytochrome P-450, See Biotransformation (drug), microsomes**

## D

**Dantrolene, See under Neuromuscular relaxants**

**Death, See under Complications**

**Diabetes, See under Metabolism**

**Diagnosis, x-ray, See under Complications**

**Diaphragm, See under Muscle, skeletal; Ventilation**

**Diazepam, See under Anesthetics, intravenous; Hypnotics, benzodiazepines**

**Diethyl ether, See under Anesthetics, volatile**

**Diltiazem, See under Ions, calcium channel blockers**

**Dipyridamole, See under Pharmacology**

**Distribution, See under Pharmacokinetics**

**Dobutamine, See under Pharmacology**

**Dopamine, See under Sympathetic nervous system**

**Doppler, See under Equipment**

**Doppler ultrasound, See under Measurement techniques**

**Dorsal horn ganglia, See under Spinal cord**

**Dose-response curves, See under Pharmacology**

**Droperidol, See under Anesthetics, intravenous**

**Drug biotransformation, See Biotransformation (drug)**

**Drug interactions, See Interactions (drug)**

## E

**ECG, See under Heart; Measurement techniques; Monitoring**

**Echocardiography, See under Measurement techniques**

**Edema, See under Complications**

**Edrophonium, See under Antagonists, neuromuscular relaxants**

**Education**  
**medical students**  
attitudes of, toward anesthesiology, before and after rotation [Gotta, Hartung & Hill], A558  
what should be taught about anesthesiology to, results of needs assessment survey on [Polk], A557

**residents**  
anesthesia simulation in actual operating room environment [Gaba & DeAnda], A467  
assessment of, written exam vs. attending evaluations for [Schwartz, Sidhu, Maneksha & Poppers], A562  
clinical competence and trainee personality traits [Ronai & Funk], A561  
comparison of complications from right internal jugular and left subclavian vein cannulation in training program [Neal, Wallfisch & Arens], A222  
evaluation of anesthetized pig vs. mannequin for teaching epidural needle and catheter placement [Owen, Choi, Chestnut, Bates & From], A223  
internship as predictor of performance of [Rhoton, Barnes, Estafanous & Michener], A560  
is anesthesia externship a predictor of future performance of [Silverstein, Martin, Johnston, Blair & Balser], A559

- learning style distribution, consistent relationship of, between faculty and [Baker III, Wallace & Cooke], A564
- personal computer spreadsheet as teaching tool for drug kinetics [Pinchak], A224
- rank order correlations of clinical and academic performance in anesthesia: faculty ratings, daily evaluations, and test scores [Rhoton], A563
- structured mishap analysis using problem-solving model [Gaba, DeAnda & Parsons], A468
- Tulane University School of Medicine Department of Anesthesiology goal-directed case management worksheet as learning tool for [Smith & Texidor], A565
- EEG, See under Measurement techniques; Monitoring**
- Ejection fraction, See under Measurement techniques**
- Elderly, See Age factors; Anesthesia, geriatric**
- Electrocardiography, See under Heart; Measurement techniques; Monitoring**
- Electrodes, See under Measurement techniques**
- Electroencephalogram, See under Measurement techniques**
- Electroencephalography, See under Brain; Monitoring**
- Electrolytes, See Acid-base equilibrium; Fluid balance; Ions**
- Electromyography, See under Measurement techniques**
- Electrophysiology, See under Heart**
- Embolism**
  - air**
    - intraoperative detection with transesophageal color Doppler imaging [Roewer, Bednarz, Dziadzka, Schontag & Schulte am Esch], A180
    - paradoxical, parameters affecting occurrence of [Oliver, Cucchiara, Nishimura & Michenfelder], A435
    - pulmonary edema induced by, effects of regional hypoxia on [Overand, Eisenstein, Bishop & Cheney], A550
    - treatment with special pulmonary artery catheter introducer sheath, in sitting dogs [Bowdle & Artur], A86
    - venous, detection of, by emission spectrometry and mass spectrometry during normobaric and hyperbaric conditions [Russell, Snider, Richard & Loomis], A436
    - venous, detection of, left vs. right parasternal Doppler placement for [Schubert, Drummond & Shapiro], A179
- Emesis, See Vomiting**
- EMG, See Measurement techniques, electromyography**
- Encephalopathy, See under Complications**
- Endarterectomy, carotid, See Surgery, carotid endarterectomy**
- Endobronchial tubes, See under Equipment, tubes**
- Endorphins, See under Polypeptides**
- Endotoxic shock, See under Shock**
- Endotracheal intubation, See Intubation, endotracheal**
- Endotracheal tubes, See under Equipment, tubes**
- Enflurane, See under Anesthetics, volatile**
- Enkephalins, See under Polypeptides**
- Enzymes, See also Metabolism**
  - cholinesterase**
    - plasma, inhibition of, in vitro, atracurium and [Kupferberg, James & Seals], A602
  - methionine synthase**
    - nitrous oxide inactivation of, and decrease in folic acid activity in man [Hawkins, Snider, Russell, Davis & Biebuyck], A292
  - pseudocholinesterase**
    - content and quality in human cerebrospinal fluid [Kambam, Horton, Parris, Hyman, Berman & Sastry], A252
  - xanthine dehydrogenase**
    - conversion to xanthine oxidase during renal ischemia, characterization of [Pearson, Beckman, Freeman & Parks], A305
  - xanthine oxidase**
    - conversion from xanthine dehydrogenase during renal ischemia, characterization of [Pearson, Beckman, Freeman & Parks], A305
- Ephedrine, See under Sympathetic nervous system, sympathomimetic agents**
- Epidural anesthesia, See under Anesthetic techniques, peridural**
- Epinephrine, See under Heart, arrhythmia; Sympathetic nervous system, catecholamines**
- Equipment, See also Measurement techniques; Monitoring**
  - anesthesia machines**
    - expert system for assessment and control of inhalational anesthesia using vital signs [Gingrich & Vishnoi], A195
  - capnography**
    - automated analysis of [Duranteau, Deriaz, Schurandeanu, Rader & Payen], A196
  - catheters**
    - bronchial**
      - protected, diagnosis of nosocomial pneumonia in mechanically ventilated patients with [Rossignon, Rouby, Belbachir, Nicolas, Martin de Lassale & Viars], A123
    - flow-directed**
      - clinical trial of atrioventricular Paceport thermodilution catheter and transluminal atrial bipolar pacing probe [Trankina, White & Pluth], A183
      - comparison of two, in critically ill patients [Reinhart, Moser, Rudolph, Gramm, Goecke & Eyrich], A182
      - patient's position influences incidence of dysrhythmias during pulmonary artery catheterization [Keusch, Winters & Thys], A184
      - sternal retraction and pulmonary artery catheter compromise [Mantia, Lolley, Robinson, Neiman & Stullken Jr.], A185
    - pulmonary artery**
      - compromise, sternal retraction and [Mantia, Lolley, Robinson, Neiman & Stullken Jr.], A185
      - patient's position influences incidence of dysrhythmias with [Keusch, Winters & Thys], A184
      - special introducer sheath, treatment of air embolism with, in sitting dogs [Bowdle & Artur], A86
  - venous**
    - infiltration, detection of, resistance to fluid flow and [Philip], A194
    - prevention of hypervolemic hyponatremia syndrome by continuous monitoring [Watkins-Pitchford & Learned], A216
    - unique hydratable, evaluation of [Cooke & Walker], A208
- circuits**
  - closed**
    - evaluation of personal dosimeters to measure N<sub>2</sub>O exposure when using different gas flows [Kim, Aldrete & Kullavani-jaya], A163
    - open vs., patient safety and [Ernst, MacKrell, Pearson, Cutter & Wagenknecht], A474
  - nonbreathing**
    - Bain, conservation of anesthetic gases using [Shah & Bedford], A212
    - evaluation of personal dosimeters to measure N<sub>2</sub>O exposure when using different gas flows [Kim, Aldrete & Kullavani-jaya], A163
    - valveless coaxial system with carbon dioxide absorber [Nico-demus & Schubert], A211
  - open**
    - closed vs., patient safety and [Ernst, MacKrell, Pearson, Cutter & Wagenknecht], A474
- computers**
  - in analysis of capnograms [Duranteau, Deriaz, Schurandeanu, Rader & Payen], A196

- anesthesia simulation in actual operating room environment [Gaba & DeAnda], A467
- artifact rejection for inductance plethysmography apnea monitors [East, East, Waterfall, Mathews & Pace], A190
- automatic control of neuromuscular blockade with [Quill, Reves, Jacobs & Glass], A641
- expert system for assessment and control of inhalational anesthesia using vital signs [Gingrich & Vishnoi], A195
- frequency with which ST segment trends predict intraoperative myocardial ischemia [Ellis, Roizen, Aronson, Feinstein & Briller], A2
- infusion pump controlled by, fentanyl administered by, pharmacokinetic analysis of [Shafer, Martinez, Stanski & Scott], A666
- infusion pumps controlled by, performance criteria for [Shafer, Siegel, Cooke & Scott], A192
- performance of voice recognition component of automated record keeping system [Smith, Brien & Banke], A193
- spreadsheet for teaching drug kinetics [Pinchak], A224
- structured mishap analysis using problem-solving model [Gaba, DeAnda & Parsons], A468
- use of simulation to reduce animal studies [Quinn, Smith, Masuzawa, Martin, Mandel & Hatakeyama], A215
- Doppler**
- color, transesophageal, intraoperative detection of venous embolism with [Roewer, Bednarz, Dziadzka, Schontag & Schulte am Esch], A180
- esophageal, continuous, left ventricular contractility determination by [Thys, Hillel & Estioko], A77
- left vs. right parasternal placement of, for detection of venous air embolism [Schubert, Drummond & Shapiro], A179
- laryngoscopes**
- fiberoptic, rigid and, cardiovascular changes with [Schrader, Ovassapian, Dykes & Avram], A28
- needles**
- recapping of, safety of [Hein, Reinhart, Wansbrough, Jantzen & Giesecke Jr.], A161
- size of, effect of, on measurement of potassium level in arterial blood samples [Pinchak, Shepard, Hagen, Hancock & Schulz], A480
- Touhy, in axilla, continuous brachial plexus block introducing catheters through [Plancarte, Amescua, Marron, San Miguel & Aldrete], A287
- nerve stimulators**
- comparison of ulnar nerve tetanic stimulation and clamping of anterior axillary fold to surgical incision for determination of MAC [Schultz, Katz & Pavlin], A669
- nitrogen analyzer**
- raman scattering, first clinical evaluation of [Westenskow, Smith, Coleman, Gregonis & VanWagenen], A642
- pacemakers**
- clinical trial of atrioventricular Paceport thermodilution catheter and transluminal atrial bipolar pacing probe [Trankina, White & Pluth], A183
- effects of previous cardiac surgery on esophageal current thresholds in patients undergoing coronary artery bypass grafting [Buchanan, Clements, Reves, Hochman & Kates], A17
- transcutaneous, noninvasive, in patients undergoing cardiopulmonary bypass [Kelly, Royster & Angert], A16
- pulse oximeter**
- Doppler vs., systolic blood pressure measurement with [Korbon, Wills, D'Lauro & Lawson], A188
- tubes**
- endobronchial**
- margin of safety in positioning of [Benumof, Partirdge, Salvatierra & Keating], A556
- endotracheal**
- double-lumen, margin of safety in positioning of [Benumof, Partirdge, Salvatierra & Keating], A556
- vaporizers**
- for inhalation anesthetics during high frequency jet ventilation [Mazloomdoost, Klain, Nemoto, Lin & Foon], A210
- ventilators**
- functional limitations of [Schapera, Marks, Katz & Kraemer], A133
- high frequency jet ventilation with heliox [Cros, Guenard, Boudet & Erny], A201
- infant, Sechrist, end-tidal PCO<sub>2</sub> measurements in infants and children ventilated with [Badgwell, McLeod, Lerman & Creighton], A511
- pressure transients in, failure of disconnect alarm system [Picard, Hancock & Pinchak], A189
- Erythrocytes, See under Blood**
- Esmolol, See under Sympathetic nervous system, sympatholytic agents**
- Esophagus, See under Gastrointestinal tract**
- Etidocaine, See under Anesthetics, local**
- Etomidate, See under Anesthetics, intravenous; Hypnotics, barbiturates**
- Evoked potentials, See under Brain; Measurement techniques**
- somatosensory, See under Monitoring**
- Extubation, See under Anesthetic techniques**
- Eyes**
- intraocular pressure**
- changes in, during rapid sequence induction of anesthesia using propofol or thiopental with vecuronium [Elliott, Mirakhor & Shepherd], A483
- during induction of anesthesia with propofol or thiopental followed by vecuronium, influence of additional dose of induction agent on [Elliott, Mirakhor & Shepherd], A484
- positive end-expiratory pressure and [Nimmagadda, Joseph, Salem, Villarreal & Lopez], A132
- pupil size as prognostic factor during cardiopulmonary resuscitation in man [Steen-Hansen, Vaagenes & Hansen], A146
- stress response to local anesthesia for cataract surgery [Moss, Donlon Jr. & McGoldrick], A67
- surgery, pediatric, postoperative vomiting in, nitrous oxide does not affect [Gibbons, Davidson & Adler], A530
- surgery, strabismus, pediatric, postoperative emesis after, effect of preoperative oral droperidol on incidence of [Kaya, Nicolson, Betts, Cochran & Swedlow], A531

## F

Fatty acids, *See under Metabolism*Fenoldopam, *See under Pharmacology*Fentanyl, *See under Analgesics, narcotic; Anesthetics, intravenous*

Fetus

acid-base status of, at cesarean section, influence of crystalloid solution choice on [Norris, Leighton, DeSimone, Goodman &amp; Gorman], A458

breathing movements of, biphasic effects of morphine on [Szeto, Zhu, Umans &amp; Dwyer], A457

hypoxemia in, intravenous clonidine produces [Eisenach, Rose, Dewan &amp; Grice], A449

neurobehavioral effects following maternal administration of epidural fentanyl during labor [Capogna, Celleno, McGannon, Richardson &amp; Kennedy], A461

uptake of bupivacaine vs. lidocaine at steady state plasma drug concentrations [Morishima, Pedersen, Santos, Finster &amp; Covino], A437

**Fiberoptics**, *See under* Equipment, laryngoscopes  
**Fibrillation, ventricular**, *See under* Heart, arrhythmia  
**Fick principle**, *See under* Measurement techniques  
**Fistula**, *See under* Complications  
**Flecainide**, *See under* Heart, arrhythmias, antiarrhythmics  
**Fluid balance**, *See also* Acid-base equilibrium  
    colloid  
        isotonic solutions, hemodilution with, acute cerebral effects of, following cryogenic brain injury [Zornow, Scheller, Todd & Moore], A583  
    crystalloid  
        choice of solution, influence of, on neonatal acid-base status at cesarean section [Norris, Leighton, DeSimone, Goodman & Gorman], A458  
        isotonic solutions, hemodilution with, acute cerebral effects of, following cryogenic brain injury [Zornow, Scheller, Todd & Moore], A583  
**Flumazenil**, *See* Antagonists, benzodiazepine, RO 15-1788  
**Flunitrazepam**, *See under* Anesthetics, intravenous  
**Fluoride**, *See under* Ions  
**Fluorine-19 nuclear magnetic resonance**, *See under* Measurement techniques, nuclear magnetic resonance  
**Fluorometabolites**, *See under* Biotransformation (drug)  
**Fluroxene**, *See under* Anesthetics, volatile  
**FRC**, *See* Lung, capacity, functional residual  
**Functional residual capacity**, *See under* Lung, capacity

## G

**Gastrointestinal tract**, *See also* Vomiting  
    esophagus  
        lower, contractility of, and clinical signs of light anesthesia [Aitkenhead, Lin & Thomas], A671  
        lower, contractility of, depth of anesthesia and [Hein & Whitaker], A645  
        lower, contractility of, depth of anesthesia and, controlled trial of efficacy of measure of [Erickson, Foss & Kuni], A672  
        lower, contractility of, depth of anesthesia and, during open heart surgery [Silvay, Grossbarth, Erickson, Kuni & Kaplan], A644  
    stomach  
        effect of perioperative opioids on postoperative gastric emptying [Howe, Milligan, McClean & Dundee], A164  
        volume and acidity in, in children, effects of oral transmucosal fentanyl citrate premedication on [Leiman, Walford, Rawal, Katz, Marcus, van Nieuwenhuyzen, Cronau & Stanley], A489  
**General anesthesia**, *See under* Anesthesia  
**Genetic factors**  
    variation of anesthetic responses in *C. elegans*, A382  
**Geriatric anesthesia**, *See under* Anesthesia  
**Glucocorticoids**, *See under* Hormones  
**Glucose**, *See under* Metabolism

## H

**Halothane**, *See under* Anesthetics, volatile  
**Headache**, *See under* Complications  
**Heart**  
    arrhythmia  
        during anesthesia with halothane in children, effects of anticholinergic agents on [Badgwell, Heavner, Cooper, Cockings & Lerman], A497  
    antiarrhythmics  
        flecainide, hemodynamic and electrocardiographic effects of, during enflurane anesthesia in dog [Pettit & Kapur], A98

bupivacaine and, progesterone effect on [Baum, Miletich & Curran], A439  
**epinephrine**  
    arrhythmogenic plasma levels of, during sevoflurane, isoflurane, and enflurane anesthesia, in dog [Hayashi, Sumikawa, Tashiro, Yoshiya & Yamatodani], A57  
    effects of chronic hypokalemia on heart potassium and duration of, in rat [Albrecht, Miletich & Less], A70  
    increasing doses of, during cardiopulmonary resuscitation in infant swine, cerebral and myocardial blood flow response to [Berkowitz, Koehler, Schleien, Dean, Gervais, Michael, Rogers & Traystman], A649  
    test dose of, blood pressure response to, in beta-blocked subjects [Hom, Johnson & Mulroy], A268  
    fibrillation, ventricular, threshold of, high bupivacaine and lidocaine plasma levels raise [Ponhold, Gombotz, Rehak, Eichinger & Stenzl], A272  
**tachycardia**  
    alinidine effects on, after open heart surgery [Spiss, Rosenits, Haslinger, Redl & Haider], A44  
    intraoperative, esmolol for treatment of [Reves, Croughwell, Hawkins & Jacobs], A33  
**atria**  
    human, isolated, comparative inotropic effects of ketamine and isoflurane in [Chang, Luk, Lin & Wei], A92  
**atrioventricular block**  
    verapamil accentuates effect of enflurane more than isoflurane or halothane on incidence of [Bosnjak, Marijic, Stowe & Kampine], A61  
**blood flow**  
    phenylephrine vs. epinephrine and, during and following cardiopulmonary resuscitation in dogs [Schleien, Koehler, Berkowitz, Dean, Gervais, Michael, Rogers & Traystman], A650  
    response to increasing doses of epinephrine during CPR in infant swine [Berkowitz, Koehler, Schleien, Dean, Gervais, Michael, Rogers & Traystman], A649  
**blood flow, myocardial**  
    blood pressure and heart rate predict ischemia in collateral-dependent myocardium [Buffington, Bashein & Sivarajan], A5  
    changes during induced hypotension with nitroglycerine, isoflurane and ATP in subhuman primates [Fukunaga, Ito, Iijima, Kubota & Miyamoto], A8  
    contrast echocardiography for intraoperative quantitation of [Segil, Dick, Feinstein & Silverman], A100  
    development of regional myocardial ischemia during acute pulmonary hypertension when right coronary artery stenosis is present [Priebe], A6  
    effects of dobutamine on systolic and diastolic coronary bypass graft flow in humans [Beloucif, Payen, Laborde, Bousseau & Echter], A40  
    free and limited, effects of inositol hexaphosphate induced high P50 on isolated rabbit heart with [Baron, Vicaut, Stucker, Villereal, Ropars, Teisseire, Viars & Duvelleroy], A102  
    moderate hypotensive anesthesia with enflurane and isoflurane and [Hobbbahn, Conzen, Goetz, Seidel, Gonschior, Brendel & Peter], A589  
    oxygenation of collateral flow dependent myocardium during isoflurane anesthesia, coronary perfusion pressure and [Conzen, Hobbbahn, Goetz, Seidel, Gonschior, Peter & Brendel], A588  
**cardiac output**  
    acute administration of clonidine and, naloxone reversal of changes caused by [Raybould, Bloor, McIntee & Flacke], A392  
    comparison of effects of central vs. peripheral bolus injections of



- potassium chloride on aortic root potassium concentrations in swine [Scheller, Mazzei, Zornow & Mitchell], A108
- effects of  $\alpha_1$ -adrenergic bolus administration in anesthetized patients [Schwinn, Clements, Hawkins, Kates & Reves], A72
- effects of BW A938U on, in coronary artery bypass graft and valve replacement patients receiving oxygen sufentanil anesthesia [Stoops, Curtis, Kovach, McCammon, Stoelting & Warren], A368
- effects of BW A938U on [Konstadt, Thys, Reich, Keusch & Kaplan], A369
- effects of pipecuronium bromide in CABG patients [Wierda, Karliczek, van den Brom, Kersten-Kleef & Agoston], A613
- low, postoperative, peripheral effects of dobutamine in [Cork, Gallo Jr., Levinson, Smith & Copeland], A41
- low, postoperative, peripheral effects of isoproterenol in [Cork, Gallo Jr., Levinson, Smith & Copeland], A43
- prognostic value of preoperative noninvasive Doppler measurements of [Belani & Estrin], A122
- response to inhalation anesthetics, in rat, influence of renal vasodilating infusions of Fenoldopam on [Ebling, Nunez & Field], A101
- sevoflurane in newborn swine and [Gallagher, Burrows, Miyasaka, Volgyesi & Lerman], A503
- during total knee replacement surgery with total condylar prosthesis [Tartiere, Gerard, Samii & Quesnel], A106
- transhiatal esophagus resection and [Yakoubian, Bougeois, Marty, Marmuse & Desmots], A119
- transient analysis of respiration using ECG-triggered phrenic nerve stimulation [Peters, Kindred & Robotham], A81
- cardiopulmonary resuscitation**
- cardiopulmonary bypass vs., cardiac resuscitability and neurologic recovery after clinically relevant cardiac arrest of 20 min with [Angelos, Reich, Safar, Stezoski & Houghton], A147
- in dogs, comparison of phenylephrine and epinephrine on cerebral and myocardial perfusion and somatosensory evoked potentials during and following [Schleien, Koehler, Berkowitz, Dean, Gervais, Michael, Rogers & Traystman], A650
- drug circulation during cardiac arrest [Emerman, Pinchak, Hancock & Hagen], A149
- in infant swine, cerebral and myocardial blood flow response to increasing doses of epinephrine during [Berkowitz, Koehler, Schleien, Dean, Gervais, Michael, Rogers & Traystman], A649
- in man, pupil size as prognostic factor during [Steen-Hansen, Vaagenes & Hansen], A146
- in swine, effect of compression rate and duty cycle on cerebral perfusion pressure during [Koehler, Dean, Schleien, Berkowitz, Michael, Atchison, Rogers & Traystman], A152
- conduction**
- specialized, inhalation anesthetics and diltiazem on [Atlee, Brownlee & Kreigh], A60
- specialized, inhalation anesthetics and verapamil on [Atlee, Brownlee & Kreigh], A59
- verapamil accentuates effect of enflurane more than isoflurane or halothane on [Bosnjak, Marijic, Stowe & Kampine], A61
- congenital defects**
- cyanotic heart disease, accuracy of pulse oximetry in [Lazzell & Jopling], A169
- heart disease, effect of premedication on preoperative arterial oxygen saturation in children with [De Bock, Petrilli, Davis & Motoyama], A492
- heart disease, effect on pharmacokinetics of intravenous lidocaine in pediatrics [LeDez, Strong, Reider, Burrows & Lerman], A71
- heart disease, repair of, hyperventilation in infants after, pulmonary and systemic hemodynamic effects of [Wessel, Hickey & Hansen], A526
- contractility**
- comparative effects of ketamine and isoflurane on [Chang, Luk, Lin & Wei], A92
- effect of ribose administration on recovery following brief periods of ischemia [Sami & Bittar], A74
- effects of halothane on function of sarcoplasmic reticulum in skinned myocardial fibers of newborn and adult rabbit [Krane & Su], A93
- during halothane and isoflurane anesthesia, echocardiographic assessment of [Mazzei, Dan, Scheller, Dittrich & Sahn], A590
- left ventricular, determined by continuous esophageal Doppler [Thys, Hillel & Estioko], A77
- myosin isoenzyme shifts and effects of halothane on, in non-insulin treated spontaneously diabetic rats [Baum, Miletich, Clarke & Pelligrino], A95
- presence of amrinone differentially attenuates anesthetic-induced myocardial depression in vitro following isoflurane, but not halothane, anesthesia [Neal, Wolf & Mathew], A91
- in rat, during maturation, enflurane and [Shimosato, Mizukawa, Tinker, Ross & Kayaba], A97
- two-dimensional, usefulness of end systolic quotient and of fractional shortening for assessment of changes in, under different loading conditions [Heinrich, Fontaine, Wilder-Smith, Winter & Ahnefeld], A209
- coronary artery disease**
- hemodynamic effects of BW A938U in patients with, during oxygen sufentanil anesthesia [Stoops, Curtis, Kovach, McCammon, Stoelting & Warren], A368
- normovolemic hemodilution in anesthetized patients with, effects on hemodynamic and LV function of [Van Derr Linden, Baron, Philip, Arthaud, Coriat, Bertrand, Vicaut, Debat & Viars], A135
- normovolemic hemodilution in patients with, hemodynamic and metabolic responses to recovery in [Van Der Linden, Baron, Philip, Arthaud, Bertrand, Coriat, Vicaut, Debat & Viars], A79
- pre-bypass, cardiac medication as factor in [Chung, Cheng, Houston, Burns & David], A593
- as predictor of myocardial infarction by technetium pyrophosphate spectroscopy [Cheng, Chung, Burns, Houston & David], A594
- segmental wall motion in patients with, evaluated by two-dimensional echocardiography, after lumbar epidural anesthesia [Saada, Duval, Bonnet, Rey & Castillon], A270
- silent preoperative myocardial ischemia in surgical patients with [Wilton, Luckoff, Sachdev, Kirsh & Shea], A591
- stress of anesthesia and surgery and [Knight, Hollenberg, London, Tubau, Verrier, Browner & Mangano], A592
- coronary blood flow**
- regional myocardial ischemia develops during acute pulmonary hypertension when right coronary artery stenosis is present [Priebe], A6
- coronary occlusion**
- acute, increased adenosine production by heart during, in man [Bardenheuer, Hoffing, Fabry & Peter], A311
- critical, canine model of, gradual or abrupt nitrous oxide administration in, regional myocardial dysfunction induced by, which is worsened by halothane [Leone, Philbin, Lehot & Foex], A676
- dissimilar effects of isoflurane vs. dipyridamole on myocardium supplied by chronically narrowed coronary artery in dog [Zimpfer, Mayer & Steinbereithner], A587

- droperidol abolishes acute thrombus formation in stenosed dog coronary arteries [Bertha, Sill, Nugent & Folts], A78
- dipyridamole thallium imaging in prediction of cardiac risk in patients scheduled for abdominal aortic surgery [Bertrand, Godet, Baron, Coriat, Mundler, Fauchet & Viars], A17
- disease**
- valvular, hemodynamic effects of BW A938U in patients with, during oxygen sufentanil anesthesia [Stoops, Curtis, Kovach, McCammon, Stoelting & Warren], A368
- electrocardiography, See also under Measurement techniques; Monitoring**
- are anesthesia and surgery truly stressful to ischemic heart [Knight, Hollenberg, London, Tubau, Verrier, Browner & Mangano], A592
- and cardiac medication as factor in pre-bypass myocardial ischemia [Chung, Cheng, Houston, Burns & David], A593
- effects of flecainide during enflurane anesthesia in dog [Pettit & Kapur], A98
- and silent preoperative myocardial ischemia in surgical patients with ischemic heart disease [Wilton, Luckoff, Sachdev, Kirsh & Shea], A591
- electrophysiology**
- does bupivacaine cardiotoxicity impede only sodium channels [d'Athis, Eledjam, de la Coussaye, Brugada, Desch & Sassine], A275
- verapamil effects on, in presence of enflurane and chloralose [Hantler, Stockton, Mattson & Knight], A96
- function**
- effects of flecainide during enflurane anesthesia in dog [Pettit & Kapur], A98
- effects of pipercuronium bromide in CABG patients [Wierda, Karliczek, van den Brom, Kersten-Kleef & Agoston], A613
- halothane directly inhibits sarcoplasmic reticular function in intact myocardium [Komai & Rusy], A54
- left ventricular, amrinone and [Grayson, Marino, Yaster, Weiss & Kass], A600
- left ventricular, and milrinone with amrinone vs. nitroprusside during enflurane anesthesia in dog [Makela & Kapur], A601
- left ventricular, effects of nicardipine vs. trinitrin for treatment of postoperative hypertension on [Benammar, Coriat, Houissa, Bruere, Brusset, Hag & Viars], A139
- left ventricular, effects of normovolemic hemodilution in anesthetized patients with coronary artery disease on [Van Der Linden, Baron, Philip, Arthaud, Coriat, Bertrand, Vicaut, Debat & Viars], A135
- left ventricular, gradual or abrupt nitrous oxide administration in canine model of critical coronary stenosis induced regional myocardial dysfunction that is worsened by halothane [Leone, Philbin, Lehot & Foex], A676
- left ventricular, in coronary artery disease patients, evaluated by two-dimensional echocardiography, after lumbar epidural anesthesia [Saada, Duval, Bonnet, Rey & Castillon], A270
- left ventricular, poor, lumbar epidural anesthesia improves ejection fraction in patients with [Coriat, Benammar, Baron, Van Der Linden, Montejo, Bertrand, Daas & Viars], A259
- left ventricular, predictors of, in post cardiopulmonary bypass period [Ossey, Hawkins, Reves & McIntyre], A596
- left ventricular, with local anesthetics and diltiazem in conscious dogs [Ahmad, Edouard, Berdeaux, Froidevaux & Samii], A271
- peripheral effects of dobutamine in postoperative low-cardiac-output state [Cork, Gallo Jr., Levinson, Smith & Copeland], A41
- peripheral effects of isoproterenol in postoperative low-cardiac-output state [Cork, Gallo Jr., Levinson, Smith & Copeland], A43
- right ventricular, effect on relationship between pericardial pressure and right atrial pressure during positive end-expiratory pressure [Biondi, Schulman, Matthay & Barash], A555
- right ventricular, isolated failure, role in mechanism of myocardial dysfunction during liver transplantation [Ellis, Lichtor, Chung, Polk, Emond, Broelsch, Thistlethwaite, Feinstein & Roizen], A82
- time course of negative inotropic effects of enflurane in isolated mammalian cardiac muscle [Housmans & Murat], A52
- ventricular, combined effects of amrinone and dobutamine [Sciolaro, Carrier, Emery, Cork, Gallo, Barkenbush, Perrotta & Copeland], A42
- ventricular, direct vs. indirect effects of alfentanil and midazolam [Flacke, Vercellino, Flacke, McIntee & Van Etten], A47
- ventricular, effects of enflurane on [Housmans & Murat], A51
- ventricular, nitrous oxide does not worsen ischemic left ventricular dysfunction in pig [Cason, Mazer, Demas & Hickey], A46
- ventricular, regional, assessment of by radionuclide angiocardiology during endotracheal intubation [Sell, Croughwell, Camporesi, Jones & Reves], A27
- inotropism**
- amrinone and, in vivo [Grayson, Marino, Yaster, Weiss & Kass], A600
- combined effects of amrinone and dobutamine [Sciolaro, Carrier, Emery, Cork, Gallo, Barkenbush, Perrotta & Copeland], A42
- comparative effects of ketamine and isoflurane in isolated human atrial tissues [Chang, Luk, Lin & Wei], A92
- effects of dobutamine on systolic and diastolic coronary bypass graft flow in humans [Beloucif, Payen, Laborde, Bousseau & Echter], A40
- mechanisms of action of protamine sulfate on isolated mammalian cardiac muscles [Housmans & Ferguson], A24
- and milrinone with amrinone vs. nitroprusside during enflurane anesthesia in dog [Makela & Kapur], A601
- negative effects of enflurane in isolated mammalian cardiac muscle, time course of [Housmans & Murat], A52
- peripheral effects of dobutamine in postoperative low-cardiac-output state [Cork, Gallo Jr., Levinson, Smith & Copeland], A41
- peripheral effects of isoproterenol in postoperative low-cardiac-output state [Cork, Gallo Jr., Levinson, Smith & Copeland], A43
- presence of amrinone differentially attenuates anesthetic-induced myocardial depression in vitro following isoflurane, but not halothane, anesthesia [Neal, Wolf & Mathew], A91
- ischemia**
- brief periods of, effect of ribose administration on contractile recovery following [Sami & Bittar], A74
- in collateral-dependent myocardium, blood pressure and heart rate predict [Bullington, Bashein & Sivarajan], A5
- development during acute pulmonary hypertension when right coronary artery stenosis is present [Priebe], A6
- effect on relationship between pericardial pressure and right atrial pressure during positive end-expiratory pressure [Biondi, Schulman, Matthay & Barash], A555
- global, during narcotic anesthesia, effect of adrenergic stress response on myocardial tolerance of [Hill, Pollard, Simeone, Reves & Lowe], A73
- intraoperative, ST segment trends in prediction of [Ellis, Roizen, Aronson, Feinstein & Briller], A2
- isoflurane and [LaMantia, Acampora, Prokop, Ezekowitz, Slavik & Barash], A586
- and moderate hypotensive anesthesia with enflurane and isoflurane

- rane [Hobbhahn, Conzen, Goetz, Seidel, Gonschior, Brendel & Peter], A589
- after neuromuscular blockade reversal [Tse, Bause & Barash], A618
- perioperative, are anesthesia and surgery truly stressful with [Knight, Hollenberg, London, Tubau, Verrier, Browner & Mangano], A592
- in pig, nitrous oxide does not worsen [Cason, Mazer, Demas & Hickey], A46
- pre-bypass, cardiac medication as factor in [Chung, Cheng, Houston, Burns & David], A593
- prediction of, by pressure-rate ratio and diastolic time during coronary artery bypass surgery [Shiraki, Hong, Jo, Strom, Goldiner & Oka], A595
- as predictor of myocardial infarction by technetium pyrophosphate spectroscopy [Cheng, Chung, Burns, Houston & David], A594
- preoperative, silent, in surgical patients with ischemic heart disease [Wilton, Luckoff, Sachdev, Kirsh & Shea], A591
- preoperative, silent, not correlated with anxiety, stress, and catecholamine levels [Wilton, Sachdev, Luckoff, Kirsh & Shea], A470
- preoperative, silent, in patients with unstable angina [Metzler, Gombotz, List & Rehak], A3
- isoproterenol**
- chronotropic effect of, reduction of, in pregnant women [DeSimone, Leighton, Norris, Chayen & Menduke], A460
- muscle**
- mammalian, isolated, mechanisms of action of inotropic effects of protamine sulfate on [Housmans & Ferguson], A24
- mammalian, isolated, time course of negative inotropic effects of enflurane in [Housmans & Murat], A52
- papillary, myocardial depressant effects of isoflurane vs. halothane in immature and mature feline papillary function of [Wolf, Neal & Mathew], A504
- rat, during maturation, mechanical properties of, enflurane and [Shimosato, Mizukawa, Tinker, Ross & Kayaba], A97
- myocardial function**
- depression, anesthetic-induced, presence of amrinone differentially attenuates in vitro following isoflurane, but not halothane, anesthesia [Neal, Wolf & Mathew], A91
- effects of enflurane on [Housmans & Murat], A51
- effects of isoflurane vs. sufentanil on experimental infarction [Davis, Sidi, McCallum, Rush & Ruiz], A99
- mechanism of dysfunction during liver transplantation, role of isolated right ventricular failure in [Ellis, Lichtor, Chung, Polk, Emond, Broelsch, Thistlethwaite, Feinstein & Roizen], A82
- subcellular effects of fentanyl and [Adams, Pruett, Blaire, Crumrine & Balser], A62
- tolerance of global ischemia during narcotic anesthesia, effect of adrenergic stress response on [Hill, Pollard, Simeone, Reves & Lowe], A73
- in vitro effects of benzodiazepine agonists and antagonists [Boyle III, White & Rendig], A63
- myocardium**
- beta-adrenoceptor density in, decreased by halothane, in dogs, as assessed by positron emission tomography [Maze, Marty, Seto, Crouzel, Valloise, Crouzel, Lancon & Syrota], A55
- bupivacaine arrhythmogenicity in heart cell culture, progesterone effect on [Baum, Miletich & Curran], A439
- collateral flow dependent, oxygenation of, during isoflurane anesthesia [Conzen, Hobbhahn, Goetz, Seidel, Gonschior, Peter & Brendel], A588
- contractility during halothane and isoflurane anesthesia, echocardiographic assessment of [Mazzei, Dan, Scheller, Dittrich & Sahn], A590
- effects of caffeine on transmembrane potential in halothane-pre-treated heart preparations isolated from malignant hyperthermia susceptible pigs [Roewer, Rumberger, Dziadzka & Schulte am Esch], A297
- effects of halothane on function of sarcoplasmic reticulum in skinned myocardial fibers of newborn and adult rabbit [Krane & Su], A93
- effects of lidocaine on single sodium channel currents in canine ventricular cells [Berman, Camardo & Siegelbaum], A426
- halothane transiently increases free intracellular calcium concentration in isolated adult rat heart cells [Wheeler, Rice, Hansford & Lakatta], A94
- intact, sarcoplasmic reticular function in, direct inhibition by halothane of [Komai & Rusy], A54
- isoflurane and ischemia [LaMantia, Acampora, Prokop, Ezekowitz, Slavik & Barash], A586
- mechanisms of action of inotropic effects of protamine sulfate on isolated mammalian cardiac muscles [Housmans & Ferguson], A24
- myosin isoenzyme shifts in non-insulin treated spontaneously diabetic rats [Baum, Miletich, Clarke & Pelligrino], A95
- rat, during maturation, mechanical properties of, enflurane and [Shimosato, Mizukawa, Tinker, Ross & Kayaba], A97
- sensitization of, by halothane, mechanism of action of  $\alpha_1$ -adrenoceptor agonists in [Hayashi, Sumikawa, Tashiro & Yoshiya], A56
- supplied by chronically narrowed coronary artery, in dog, dissimilar effects of isoflurane vs. dipyridamole on [Zimpfer, Mayer & Steinbereithner], A587
- oxygen consumption**
- of collateral flow dependent myocardium during isoflurane anesthesia [Conzen, Hobbhahn, Goetz, Seidel, Gonschior, Peter & Brendel], A588
- and moderate hypotensive anesthesia with enflurane and isoflurane [Hobbhahn, Conzen, Goetz, Seidel, Gonschior, Brendel & Peter], A589
- propranolol**
- as factor in pre-bypass myocardial ischemia [Chung, Cheng, Houston, Burns & David], A593
- rate**
- acute administration of clonidine and, naloxone reversal of changes caused by [Raybould, Bloor, McIntee & Flacke], A392
- baroreflex control of, effects of propofol on, in humans [Samain, Marty, Gauzit, Bouyet, Couderc & Desmonts], A75
- blood pressure relationship to, as clinical index of baroreceptor function [Koushanpour, Behnia, Sinclair & Chang], A76
- effect of isoproterenol is reduced in pregnant women [DeSimone, Leighton, Norris, Chayen & Menduke], A460
- effects of alinidine in patients after open heart surgery [Spiss, Rosenits, Haslinger, Redl & Haider], A44
- effects of BW A938U on [Konstadt, Thys, Reich, Keusch & Kaplan], A369
- effects of BW A938U vs. pancuronium on [Murray, Mehta, Forbes, Choi, Sokoll, Gergis, Krol & Abou-Donia], A367
- effects of BW B1090U during nitrous oxide-oxygen-narcotic anesthesia [Forbes, Choi, Mehta, Murray, Sokoll, Gergis, Douglas & Abou-Donia], A360
- effects of intrathecal perioperative morphine on [Chester, Schubert, Brandon, Pudimat & Pray], A267
- effects of pipecuronium bromide in CABG patients [Wierda, Karliczek, van den Brom, Kersten-Kleef & Agoston], A613
- effects of UL-FS 49 vs. propranolol in conscious and isoflurane-

- anesthetized chronically instrumented dogs [Wartier, Riley, Gross, Schmeling & Kampine], A48
- esmolol for treatment of intraoperative tachycardia [Reves, Croughwell, Hawkins & Jacobs], A33
- during fentanyl anesthesia in newborn infants, baroreceptor reflex control of [Murat, Levron & Saint-Maurice], A523
- left ventricular, with local anesthetics and diltiazem in conscious dogs [Ahmad, Edouard, Berdeaux, Froidevaux & Samii], A271
- and prediction of ischemia in collateral-dependent myocardium [Buffington, Bashein & Sivarajan], A5
- prediction of myocardial ischemia by pressure-rate ratio and diastolic time during coronary artery bypass surgery [Shiraki, Hong, Jo, Strom, Goldiner & Oka], A595
- sevoflurane in newborn swine and [Gallagher, Burrows, Miyasaka, Volgyesi & Lerman], A503
- transplantation**
- comparison of cardiac outputs determined by impedance cardiography and thermodilution in patients [Mintz, Dirkes, Melvin, Silver & Denson], A213
- vascular pressures**
- effects of  $\alpha_1$ -adrenergic bolus administration in anesthetized patients [Schwinn, Clements, Hawkins, Kates & Reves], A72
- effects of BW A938U on [Konstadt, Thys, Reich, Keusch & Kaplan], A369
- effects of BW A938U on, in coronary artery bypass graft and valve replacement patients receiving oxygen sufentanil anesthesia [Stoops, Curtis, Kovach, McCammon, Stoelting & Warren], A368
- is CVP the appropriate downstream pressure in systemic vascular resistance calculations [Beattie, Stevenson, Maruschak, Rosenfeld & Watkins], A87
- and milrinone with amrinone vs. nitroprusside during enflurane anesthesia in dog [Makela & Kapur], A601
- and oxygenation of collateral flow dependent myocardium during isoflurane anesthesia Conzen, Hobbhahn, Goetz, Seidel, Gonschior, Peter & Brendel], A588
- wall motion**
- assessment of, by radionuclide angiocardiology, during endotracheal intubation [Sell, Croughwell, Camporesi, Jones & Reves], A27
- segmental, in coronary artery disease patients after lumbar epidural anesthesia, evaluated by two-dimensional echocardiography [Saada, Duval, Bonnet, Rey & Castillon], A270
- Heating, See under Temperature**
- Hematoma, See under Complications**
- Hemodilution, See under Blood**
- Hemoglobin, See under Blood**
- Hemolysis, See under Blood**
- Hemorrhage, See also Blood, loss**
- compensatory humoral and hemodynamic responses to, enflurane alteration of [Zimpfer, Mayer, Kotai & Placheta], A53
- deliberate hypotension complicated by, regional cerebral blood flows during [Sperry, Monk, Durieux, Walker & Longnecker], A575
- subarachnoid, due to aneurysm rupture, cerebral vasospasm after, curative treatment with intravenous nimodipine for [Gugliari, Taquai, Philippon & Viars], A584
- subarachnoid, treatment with nimodipine affects pulmonary gas exchange in patients requiring controlled mechanical ventilation [Germann, Aloy, Zabloudil, Richling & Zimpfer], A115
- Heparin, See under Blood, anticoagulants**
- High frequency jet ventilation, See under Ventilation**
- Hip replacement, See under Surgery, orthopedic**
- Histamine**
- antagonists**
- cimetidine**
- cardiovascular reactions due to histamine release during bone-cement implantation for total hip joint replacement [Tryba, Thole & Wruck], A68
- influence on duration of vecuronium neuromuscular blockade in postpartum patients vs. nonpregnant controls [Tessem, Adenwala, Camp & Joyce], A451
- ranitidine**
- influence on duration of vecuronium neuromuscular blockade in postpartum patients vs. nonpregnant controls [Tessem, Adenwala, Camp & Joyce], A451
- effects of oxymorphone or fentanyl on plasma concentrations of [Fahmy, Bottros, Charchafieh, Sunder & Carr], A395
- peripheral airway responses to [Lindeman, Freed & Hirshman], A545
- release of, from lung mast cells of asthmatic vs. nonasthmatic dogs [Hirshman, Austin & Kettlekamp], A544
- systemic release of, by epidural morphine [Korsh, Ramanathan, Parker & Turndorf], A445
- Hormones**
- antidiuretic**
- release of, by epidural morphine [Donnenfeld, Ramanathan, Parker, Vargas & Turndorf], A446
- response during nitroprusside induced hypotension, clonidine reduction of [Ghignone, Quintin, Noe & Calvillo], A38
- stress response following reversal of benzodiazepine-induced sedation [White, Shafer, Boyle & Doze], A661
- glucocorticoids**
- mechanism of action of, on airways [Darowski, Hannon, Rennie & Hirshman], A546
- progesterone**
- bupivacaine arrhythmogenicity in heart cell culture and [Baum, Mileich & Curran], A439
- prostaglandins**
- arachidonic acid derivatives, interactions with pulmonary capillary pressure and platelet microaggregates in acute lung injury [Cope, Taylor, Longenecker, Fontenelle & Miller], A652
- effects in porcine model of pulmonary hypertension [Prielipp, Pearl, McLean & Rosenthal], A154
- evidence that endogenous leukotrienes do not play major role for hypoxic pulmonary vasoconstriction in pigs [Conzen, Zenker, Vollmar, Hobbhahn, Goetz, Martin & Brendel], A310
- indomethacin**
- effects on surfactant-deficient lung injury of cyclooxygenase inhibition with [Fung, Burger & Bryan], A112
- mediation of adverse effects of protamine sulfate by [Hobbhahn, Conzen, Zenker, Goetz, Brendel & Peter], A25
- prostacyclin**
- effects in porcine model of pulmonary hypertension [Prielipp, Pearl, McLean & Rosenthal], A154
- role of leukotrienes in hypoxic pulmonary vasoconstriction in sheep [Pearl & Prielipp], A549
- tosyl arginyl methyl ester (TAME) blocks thromboxane A<sub>2</sub> mediated pulmonary vasoconstriction [Crowley, Gurtner & McShane], A109
- vasodilator therapy in vasoconstrictor model of pulmonary hypertension in sheep [Prielipp, Pearl & Rosenthal], A104
- Hydromorphone, See under Analgesics, narcotic**
- 5-Hydroxytryptamine, See Serotonin**
- Hyperbaria**
- nitrogen**
- detection of venous air embolism by emission spectrometry and

- mass spectrometry during [Russell, Snider, Richard & Loomis], A436
- Hypercapnia, See Carbon dioxide, hypercarbia**
- Hypercarbia, See under Carbon dioxide**
- Hyperglycemia, See under Metabolism**
- Hypertension, See under Blood pressure; Complications**
- Hyperthermia**
- malignant pyrexia
- model for, dantrolene antagonizes synergistic hemolysis of human red blood cells by halothane and phospholipase A<sub>2</sub> [Fletcher, Kistler, Rosenberg, Michaux & Tripolitis], A298
- noninvasive detection of susceptibility to, by in vivo <sup>31</sup>P NMR [Olgin, Argov, Rosenberg & Chance], A166
- patch clamp whole-cell currents in cultured skeletal muscle from patients susceptible to [Wieland, Fletcher & Rosenberg], A318
- pigs susceptible to, effects of caffeine on transmembrane potential in halothane-pretreated heart preparations isolated from [Roewer, Rumberger, Dziadzka & Schulte am Esch], A297
- in susceptible swine, BW A938U does not trigger [Kreul, Sufit, Brunson, Bellay & Will], A299
- whole body, under general anesthesia, serum creatinine concentration and clearance during [Cronau Jr., Mansfield & Bull], A306
- Hyperventilation, See Carbon dioxide, hypocarbia**
- Hypnotics, See also Anesthetics, intravenous**
- barbiturates
- etomidate
- comparison of infusion techniques during regional anesthesia [Urquhart & White], A265
- morphine and fentanyl anesthetic interactions with [Kissin, Brown & Bradley Jr.], A383
- methohexital
- comparison of infusion techniques during regional anesthesia [Urquhart & White], A265
- pentobarbital
- effects on cerebral blood flow of, isoflurane influence on [Scheller, Smith, Todd & Drummond], A406
- benzodiazepines
- diazepam
- in vitro myocardial effects [Boyle III, White & Rendig], A63
- oral solution with meperidine and atropine, oral transmucosal fentanyl citrate vs., for premedication in children [Nelson, Streisand, Mulder, East & Stanley], A490
- lorazepam
- auditory amnesia induced by, time course of, relationship to cognitive evoked potentials of, in humans [Samra, Bradshaw, Pandit, Moore & Papanicolaou], A420
- midazolam
- comparison of infusion techniques during regional anesthesia [Urquhart & White], A265
- in vitro myocardial effects [Boyle III, White & Rendig], A63
- intramuscular, outpatient premedication with [Shafer, Urquhart, Doze & White], A419
- pharmacological quantitation of CNS drug effect in hypnotic doses [Buhrer, Maitre, Ebling & Stanski], A658
- sedative and ventilatory effects of [Mora, Torjman & DiGiorio], A534
- sedative doses significantly depress hypoxic ventilatory drive in man [Alexander & Gross], A533
- Hypocapnia, See Carbon dioxide, hypocarbia**
- Hypocarbia, See under Carbon dioxide**
- Hypoglycemia, See under Metabolism**
- Hypokalemia, See under Ions, potassium**
- Hypotension, See under Anesthetic techniques; Blood pressure; Complications**
- Hypothermia, See under Anesthetic techniques**
- Hypovolemia, See under Blood, loss; Blood, volume**
- Hypoxia, See also Oxygen**
- characterization of xanthine dehydrogenase conversion to xanthine oxidase during renal ischemia [Pearson, Beckman, Freeman & Parks], A305
- effects of fluoride ion on ischemic and non-ischemic canine kidney [Rice, Southard, Hjelmhaug & Belzer], A304
- evidence against central chemoreceptor control of cerebral blood flow with [Miyabe, Koehler, Jones Jr., Gurtner & Traystman], A84
- fetal, intravenous clonidine produces [Eisenach, Rose, Dewan & Grice], A449
- hypercarbic, in dogs, regional venous outflow, systemic blood volume and sympathetic nerve activity during [Hoka, Arimura, Bosnjak & Kampine], A105
- inhibition of hypoxic constriction: synthesis of vasodilator or consumption of substrate [Marshall, Ishibe & Marshall], A325
- in vitro, role of lactic acidosis in neuronal tissue damage inflicted by [Rigor, Dong, Brahen, West & Schurr], A322
- intraoperative, minimizing, does not affect postpneumonectomy lung growth [Karl & Rannels], A319
- intravenous clonidine producing [Eisenach], A49
- marked, after gastropasty, due to disorders of breathing in REM sleep [Knill, Moote, Rose & Skinner], A552
- in mice, survival time in, nimodipine, pentobarbital and [Baker, Costas, Gintautas, Doss, Humayun & Abadir], A430
- prevention of, oxygen administration in, during postoperative transport in children [Patel, Norden & Hannallah], A529
- pulmonary vascular response to, in isolated sheep lungs, effect of pentobarbital on [Martin & Wetzel], A326
- pulmonary vasoconstriction with, evidence that endogenous leukotrienes do not play major role for, in pigs [Conzen, Zenker, Vollmar, Hobbhahn, Goetz, Martin & Brendel], A310
- pulmonary vasoconstriction with, in sheep, role of leukotrienes in [Pearl & Prielipp], A549
- pulmonary vasoconstriction with, microhemodynamic changes in pulmonary microcirculation during [Goetz, Conzen, Berger, Hobbhahn & Brendel], A309
- during recovery from anesthesia, incidence of, pulse oximetry and [Buschman, Morris, Warren, Philip & Raemer], A481
- regional, effects of, on air embolism induced pulmonary edema [Overand, Eisenstein, Bishop & Cheney], A550
- toxicity of, in monolayers of rat hepatocytes [Schieble, Costa, Heffel & Trudell], A316
- unilateral, canine, low-dose almitrine bismesylate enhances hypoxic pulmonary vasoconstriction during [Chen, Miller, Clarke, Clergue, Marshall & Marshall], A548
- unilateral, longitudinal distribution of pulmonary vascular resistance during [Siegel, Pearl, Shafer & Ream], A554
- ventilatory responses to, effect of sufentanil infusion on, during isoflurane anesthesia in dogs [Abdul-Rasool, Aqleh, Jenkins, Valcke & Ward], A539
- ventilatory sensitivity to, after administration of agonist/antagonist [Camporesi, Glass, Moon, Steinhaus & Wagoner], A541
- I**
- ICP, See Brain, intracranial pressure**
- Immune response**
- tachyphylaxis
- to sodium nitroprusside, effect of captopril on [Stead, Bloor, Van Etten & Flacke], A37

**Indomethacin, See under Hormones, prostaglandins**

**Induction, See also under Anesthetic techniques**

**enzymes**

phenobarbital, toxicity of, in monolayers of rat hepatocytes [Schieble, Costa, Heffell & Trudell], A316

**Infants, See Anesthesia, pediatric; Surgery, pediatric**

**Infection**

long term sterility of diluted or pre-drawn solutions of succinylcholine, ephedrine, thiopental, and curare [Mayweather, Santos, Juneja & Stanek], A160

**pulmonary**

diagnosis in mechanically ventilated patients, evaluation of new protected bronchial catheter for [Rossignon, Rouby, Belbachir, Nicolas, Martin de Lassale & Viars], A123

risk of, and prevention of stress bleeding in ventilated ICU patients [Tryba], A124

**septicemia**

cerebrovascular reactivity to carbon dioxide preserved in [Bertels, Prough, Stump, Phipps & Chappell], A414

gram-negative, volume of distribution of patients in ICU with [Mitchell, Wilson, Dodek & Russell], A126

hemodynamic derangements of, attenuation of, bacterial elimination and, enhancement of, from total parenteral nutrition with lipid [Doty, Dehring, Kraft, Traber & Herndon], A150

**Inotropism, See under Heart**

**Insufflation, See under Anesthetic techniques**

**Insulin, See under Metabolism**

**Intensive care**

enhancement of bacterial elimination and attenuation of hemodynamic derangements of sepsis from total parenteral nutrition with lipid [Doty, Dehring, Kraft, Traber & Herndon], A150

pharmacokinetics of fentanyl during continuous infusion in [Alazia, Levron, Guidon & Francois], A665

postoperative, hemodynamic effects of extubation in [Russell, Kofke, High & Snider], A131

predicted vs. measured energy requirement [Fallon, Tonnesen, Maslovitz & Hernandez], A158

prevention of stress bleeding and risk of nosocomial pneumonia in ventilated patients in [Tryba], A124

volume of distribution in patients with gram-negative sepsis in [Mitchell, Wilson, Dodek & Russell], A126

**Interactions (drug), See also Antagonists; Antagonists, narcotic; Antagonists, neuromuscular relaxants**

anesthetic efficacy of midazolam in enflurane anesthetized dog [Hall, Lasker & Hug Jr.], A657

clonidine reduces ADH response and dose requirement during nitroprusside induced hypotension [Ghignone, Quintin, Noe & Calvillo], A38

does clonidine potentiate morphine [Sperry, DiFazio & Moscicki], A391

effect of captopril on tachyphylaxis to sodium nitroprusside [Stead, Bloor, Van Etten & Flacke], A37

fentanyl and pentobarbital, on cerebral and peripheral hemodynamics in newborn lambs [Yaster, Koehler & Traystman], A516

intrathecal morphine reduces MAC of isoflurane in rat [Drasner, Bernards & Ciriales], A670

ketamine analgesia in morphine tolerant mice [Finck, Samaniego & Ngai], A396

nitrous oxide and isoflurane, on regional cerebral ischemia in rat [Baughman, Hoffman, Albrecht & Miletich], A578

phenytoin does not interfere with atracurium pharmacokinetics and pharmacodynamics [deBros, Okutani, Lai, Lawrence & Basta], A607

synergistic, morphine and fentanyl, with etomidate [Kissin, Brown & Bradley Jr.], A383

synergistic, morphine and halothane, in vitro [Puig, Warner, Tang, Lovitz & Turndorf], A411

**Intercostal anesthesia, See under Anesthetic techniques, regional**

**Intracranial pressure, See under Brain**

**Intraocular pressure, See under Eyes**

**Intrathecal anesthesia, See Anesthetic techniques, spinal**

**Intravenous anesthesia, See under Anesthetic techniques, regional**  
**Intubation, endotracheal**

assessment of wall motion by radionuclide angiocardiology during [Sell, Croughwell, Camporesi, Jones & Reves], A27

awake rigid and fiberoptic laryngoscopy, cardiovascular changes during [Schrader, Ovassapian, Dykes & Avram], A28

complications, endobronchial intubation, pulse oximetry in detection of [Barker, Tremper, Hyatt, Zaccari & Thaurer], A170

difficult, prediction of [Arora, Patterson, Hagen & Pinchak], A472

facilitation of, in outpatient surgical unit, comparison of BW B1090U with succinylcholine for [McPeck, Nozik, Walzer, Embree & Schwartz], A352

hemodynamic responses to, ablation of, with preinduction of intravenous labetalol [Leslie, Kalayjian, McLoughlin, Russell & Plachetka], A30

hemodynamic responses to, control of, aerosolized and intravenous lidocaine are no more effective than placebo for [Laurito, Baughman, Polek, Riegler & VadeBoncouer], A29

hemodynamic responses to, effect of labetalol on [Inada, Cullen, Nemeskal & Teplick], A31

sixty-second, with BW B1090U, after fentanyl-thiopental induction [Savarese, Ali, Basta, Embree & Risner], A351

**technique**

abolition of gagging and hemodynamic response to awake laryngoscopy [Woods & Lander], A220

cephalad displacement of larynx for facilitation of [Salem, Heyman, Livschutz & Mahdi], A453

retrograde, in trauma patients [Riou, Barriot, Bodenan & Viars], A130

**Ions**

**calcium**

halothane transiently increases free intracellular concentration in isolated adult rat heart cells [Wheeler, Rice, Hansford & Lakatta], A94

halothane vs. enflurane vs. isoflurane, and effects on transport and channel release functions in isolated skeletal muscle SR membranes [Nelson & Sweo], A300

inhibition of transsarcolemmal influx by isoflurane [DeTraglia, Komai & Rusy], A50

lidocaine alters phosphatidylinositol hydrolysis in vascular endothelial cells [Brown & Robinson-White], A277

spontaneous release of, from isolated sarcoplasmic reticulum of rabbit white skeletal muscle, effects of volatile anesthetics on [Peterson Jr., Baroody & Blanck], A317

**calcium channel blockers**

**diltiazem**

inhalation anesthetics and, on specialized intracardiac conduction [Atlee, Brownlee & Kreigh], A60

local anesthetics and, in conscious dogs [Ahmad, Edouard, Berdeaux, Froidevaux & Samii], A271

negative chronotropic actions of sufentanil and vecuronium in chronically instrumented dogs pretreated with [Schmeling, Kampine, Bernstein & Wartier], A90

**nicardipine**

intravenous, for treatment of intraoperative hypertension [Begon, Dartayet, Edouard, David & Samii], A39

- intravenous, for treatment of postoperative hypertension [Casar, Pool, Chelly, Barton, Turlapaty & Laddu], A141
- trinitrin vs., for treatment of postoperative hypertension, effects on hemodynamics and left ventricular function [Benammar, Coriat, Houissa, Bruere, Brusset, Hag & Viars], A139
- nifedipine**  
effects in porcine model of pulmonary hypertension [Prielipp, Pearl, McLean & Rosenthal], A154
- nimodipine**  
intravenous, curative treatment with, for cerebral vasospasm after subarachnoid hemorrhage due to aneurysm rupture [Guggiari, Taquai, Philippon & Viars], A584
- pentobarbital and, survival time in hypoxic mice and [Baker, Costas, Gintautas, Doss, Humayun & Abadir], A430
- treatment of subarachnoid hemorrhage with, and pulmonary gas exchange in patients requiring controlled mechanical ventilation [Germann, Aloy, Zabloudil, Richling & Zimpfer], A115
- nisoldipine**  
intravenous, prevention of post carotid endarterectomy hypertension with, hemodynamic and hyperadrenergic response to recovery [Braz, Coriat, Bertrand, Cheour, Landau, Mouquet & Viars], A140
- UL-FS 49**  
propranolol vs., hemodynamic effects of, in conscious and isoflurane-anesthetized chronically instrumented dogs [Warltier, Riley, Gross, Schmeling & Kampine], A48
- verapamil**  
accentuates effects of enflurane more than isoflurane or halothane on A-V conduction time and incidence of complete A-V block in isolated guinea pig heart [Bosnjak, Marijic, Stowe & Kampine], A61
- bupivacaine-induced neural conduction blockade potentiated by [Parris, Misulis, Kambam, Franks & Dettbarn], A250
- effect on spleen in early stage of canine *E. coli* endotoxin shock [Kimura, Hakoshima, Goto, Tomlinson, Krug & Arakawa], A128
- effects on cardiac electrophysiology in presence of enflurane and chloralose [Hantler, Stockton, Matson & Knight], A96
- inhalation anesthetics and, on specialized intracardiac conduction [Atlee, Brownlee & Kreigh], A59
- fluoride**  
effects on ischemic and non-ischemic canine kidney [Rice, Southard, Hjelmhaug & Belzer], A304
- magnesium**  
neuromuscular transmission studies in preeclamptic women receiving [Ramanathan, Sibai, Pillai & Angel], A633
- and relaxation of isolated human uterine arteries [Suresh & Nelson], A636
- potassium**  
aortic root concentrations, in swine, comparison of effects of central vs. peripheral bolus injection of potassium chloride on [Scheller, Mazzei, Zornow & Mitchell], A108
- in arterial blood samples, measurement of, effect of needle size on [Pinchak, Shepard, Hagen, Hancock & Schulz], A480
- heart, and duration of epinephrine induced arrhythmia, in rat, effects of chronic hypokalemia on [Albrecht, Miletich & Less], A70
- uptake, glucose uptake and, dissociation of responses to hyperinsulinemia in critically ill patients [Shangraw, Miyoshi, Jahoor, Stuart, Neff & Wolfe], A129
- sodium**  
bupivacaine cardiotoxicity and [d'Athis, Eledjam, de la Coussaye, Brugada, Desch & Sassine], A275
- effects of lidocaine on single sodium channel currents in canine ventricular cells [Berman, Camardo & Siegelbaum], A426
- excretion of, control of, by atrial natriuretic factor, during cardiac surgery by [Wood, Bullington, Hammon, Imada & Inagami], A18
- hyponatremia following surgery of spine [Shibutani, Komatsu, Taddonio & Lees], A157
- prevention of hypervolemic hyponatremia syndrome by continuous monitoring [Watkins-Pitchford & Learned], A216
- Ischemia, See under individual organs**
- Isoflurane, See under Anesthetics, volatile**
- Isoproterenol, See under Heart; Sympathetic nervous system, sympathomimetic agents**
- K**
- Ketamine, See under Anesthetics, intravenous**
- Kidney**  
**failure**  
bupivacaine pharmacokinetics during axillary brachial plexus block in [Chauvin, Mazoit, Andrivon, Goeau & Duvaldestin], A261
- influence on pharmacokinetics and duration of action of pipercuronium bromide [Caldwell, Canfell, Castagnoli, Lynam, Fahey, Fisher & Miller], A612
- isoflurane metabolism in obese rats with [Fish, Rice & Margary], A303
- patients with, pharmacokinetics of atracurium and metabolites in [van den Brom, Wierda & Agoston], A606
- function**  
atrial natriuretic peptide and effects of PEEP ventilation [Kharasch, Yeo, Laposky, Kenny & Buffington], A330
- effects of fluoride ion on ischemic and non-ischemic canine kidney [Rice, Southard, Hjelmhaug & Belzer], A304
- serum creatinine concentration and clearance during whole body hyperthermia ( $\geq 41.5^{\circ}\text{C}$ ) under general anesthesia [Cronau Jr., Mansfield & Bull], A306
- metabolism**  
characterization of xanthine dehydrogenase conversion to xanthine oxidase during renal ischemia [Pearson, Beckman, Freeman & Parks], A305
- toxicity**  
effects of fluoride ion on ischemic and non-ischemic canine kidney [Rice, Southard, Hjelmhaug & Belzer], A304
- Kinetics, See under Pharmacokinetics**
- Knee replacement, See under Surgery, orthopedic**
- L**
- Labetalol, See under Sympathetic nervous system, sympatholytic agents**
- Labor, See under Anesthesia, obstetric**
- Lactic acidosis, See under Acid-base equilibrium, acidosis**
- Laparoscopy, See under Surgery**
- Laryngoscopes, See under Equipment**
- Laryngoscopy, See under Anesthetic techniques; Larynx**
- Larynx, See also Intubation**  
**laryngoscopy**  
cephalad displacement of larynx facilitates tracheal intubation [Salem, Heyman, Livschutz & Mahdi], A453
- Leukocytes, See under Blood**
- Lidocaine, See under Anesthetics, local**
- Lipid, See under Metabolism**

**Lithotripsy, See under Surgery, urologic**

**Liver**

**blood flow**

- atracurium induced neuromuscular block is prolonged in hepatic vascular occlusion [Tsai, Lee & Mok], A605
- during halothane or isoflurane anesthesia in guinea pigs [Gelman & Hursh], A301
- influence on lidocaine pharmacokinetics after epidural administration [Saada, Bonnet, Pirabe, Benoit & Rey], A251

**cirrhosis**

- pharmacokinetics of midazolam in anesthetized patients with [Chauvin, Haberer, Ferrier, Trouvin, Farinotti & Duvaldestin], A290

**function**

- halothane decreases albumin synthesis [Franks, Kruskal, Kirsch, Beachy & Harrison], A294

**metabolism**

- atracurium induced neuromuscular block is prolonged in hepatic vascular occlusion [Tsai, Lee & Mok], A605
- does nitrous oxide inactivation of methionine synthase decrease folic acid activity in man [Hawkins, Snider, Russell, Davis & Biebuyck], A292
- hepatic clearance of sufentanil in humans [Schedewie, Lee, Cowan, Gold, Bottorff, Peters, Heerd & Angel], A291

**microsomes**

- and purified cytochrome P-450, characterization of halothane oxidation by, using gas chromatographic-mass spectrometry assay [Waskell, Konopka, Gruenke & Koop], A314

**oxygen consumption**

- comparative hepatotoxicity of halothane, isoflurane, and enflurane using isolated perfused rat liver [Mathieu, Ford, Ray & Taylor], A302
- effects of hypocapnia and hypercapnia on liver surface PO<sub>2</sub> in dog [Okazaki, Okutsu, Numata & Fukunaga], A88
- effects of thiopental and other nonvolatile agents on, in isolated hepatocytes [Becker, Holland, Miletich & Albrecht], A321
- during halothane or isoflurane anesthesia in guinea pigs [Gelman & Hursh], A301

**toxicity**

- comparative, of halothane, isoflurane, and enflurane, using isolated perfused rat liver [Mathieu, Ford, Ray & Taylor], A302
- of halothane exposure, hypoxia, and phenobarbital induction in monolayers of rat hepatocytes [Schieble, Costa, Heffel & Trudell], A316
- oxygen supply during halothane or isoflurane anesthesia in guinea pigs [Gelman & Hursh], A301

**transplantation**

- autotransfusion during [Kang, Virji, Lewis, Aggarwal, Freeman & Fortunato], A83
- in children, intraoperative changes in coagulation during [Kang, Borland, Picone & Martin], A525
- impact on anesthesia personnel and services of programs for [Spiess, Narbone, McCarthy, Rettke & Ivankovich], A568
- mechanism of myocardial dysfunction during, role of isolated right ventricular failure in [Ellis, Lichtor, Chung, Polk, Emond, Broelsch, Thistlethwaite, Feinstein & Roizen], A82
- prognostic significance of blood glucose levels during [Mallett, Kang, Freeman, Aggarwal, Gasior & Fortunato], A313

**Local anesthetics, See Anesthetics, local**

**Lorazepam, See under Hypnotics, benzodiazepines**

**Lumbar anesthesia, See under Anesthetic techniques, peridural**

**Lung, See also Airway; Ventilation**

**asthma**

- chronic, severe, subanesthetic concentration of halothane and isoflurane in [Morinet, Benhamou, Herve & Denjean], A543

- in dogs, histamine release from lung mast cells in, vs. nonasthmatic dogs [Hirshman, Austin & Kettlekamp], A544

**blood flow**

- abnormalities in early stage of acute respiratory failure [Mion, Berlioz, Rouby, Bodin, Rossignon & Viars], A113
- absence of hematogenous mediated pulmonary injury with smoke inhalation in sheep [Prien, Linares, Traber, Herndon & Traber], A111
- alveolar gas mixing dependence on [Brampton, Mackenzie, Moorman & Watson], A80
- in conscious dogs, autonomic nervous system control of, disturbance of, by pentobarbital administration [Goll, Nyhan, Clougherty, Chen & Murray], A547
- effects of 70% nitrous oxide on, in dogs [Hasinoff, Papdimitropoulos & Prewitt], A103
- interactions between pulmonary capillary pressure, platelet microaggregates, and arachidonic acid derivatives in acute lung injury [Cope, Taylor, Longenecker, Fontenelle & Miller], A652
- microhemodynamic changes in pulmonary microcirculation during hypoxic pulmonary vasoconstriction [Goetz, Conzen, Berger, Hobbhahn & Brendel], A309
- vasodilator therapy in vasoconstrictor model of pulmonary hypertension in sheep [Prielipp, Pearl & Rosenthal], A104

**capacity**

**closing**

- in anesthetized children [Jonmarker, Larsson & Werner], A488

**functional residual**

- abnormalities in patients with persistent pulmonary hypertension of the newborn [Shutack, Fox, Shaffer & Moomjian], A487
- in anesthetized children [Jonmarker, Larsson & Werner], A488
- automated sulfur hexafluoride washout measurement system for any mode of mechanical ventilation as well as spontaneous respiration [East, Bloem, Van Ark, Peng & Pace], A206

**vital**

- correlation between integrated evoked EMG and, following atracurium administration [Sharpe, Lam, Nicholas, Chung, Merchant, Alyafi & Beauchamp], A608

**damage**

- absence of hematogenous mediated pulmonary injury with smoke inhalation in sheep [Prien, Linares, Traber, Herndon & Traber], A111
- effects of cyclooxygenase inhibition with indomethacin on surfactant-deficient lung injury [Fung, Burger & Bryan], A112
- endotoxin-induced, effects of beta-2 receptor agonist on [Sjogurdsson, Mousawi & Christenson], A151
- proteolytic enzyme induced, role of leukocytes in [Toung, Sendak, Rosenfeld, Bulkley & Traystman], A646

**edema, See under Complications**

**function**

- abnormalities in patients with persistent pulmonary hypertension of the newborn [Shutack, Fox, Shaffer & Moomjian], A487
  - comparison of anesthetic effects on [Watkins & Martin], A296
  - correlation between integrated evoked EMG and, following atracurium administration [Sharpe, Lam, Nicholas, Chung, Merchant, Alyafi & Beauchamp], A608
  - in supine and lateral decubitus positions in anesthetized children [Larsson, Jonmarker, Lindahl & Werner], A499
  - influence of preoperative chest x-rays on perioperative management of cancer patients [Weibman, Shah & Bedford], A332
- perfusion, See Lung, blood flow**
- pleural effusions can be caused by superior vena caval hypertension [Allen, Drake, Gabel & Laine], A138



postpneumonectomy growth of, minimizing intraoperative hypoxemia does not affect [Karl & Rannels], A319

#### pulmonary artery

endothelium, characterization of release and transfer of endothelium-derived relaxing factor from [Johns, Izzo & Peach], A323

tone of, novel approach to study of [Murray, Macarak, Marshall & Marshall], A327

#### respiratory distress syndrome

adult, functional activation of polymorphonuclear leukocytes in patients with [Rossignon, Khayat, Royer, Rouby, Jacquillat & Viars], A647

comparison of high frequency jet ventilation with conventional ventilation for bronchopleural fistula in acute respiratory failure [Bishop, Benson, Sato & Pierson], A116

postoperative, early, evaluation of efficacy of PEEP in [Ben Ammar, Rouby, Bodin, Rossignon, Rotcayg & Viars], A651

pulmonary circulation abnormalities in early stage of [Mion, Berlioz, Rouby, Bodin, Rossignon & Viars], A113

#### respiratory resistance

abnormalities in patients with persistent pulmonary hypertension of the newborn [Shutack, Fox, Shaffer & Moonjian], A487

#### surfactant

effects of cyclooxygenase inhibition with indomethacin on surfactant-deficient lung injury [Fung, Burger & Bryan], A112

#### vascular resistance

abnormalities in patients with persistent pulmonary hypertension of the newborn [Shutack, Fox, Shaffer & Moonjian], A487

contraction of isolated pulmonary artery smooth muscle cells in culture [Murray, Macarak, Marshall & Marshall], A327

development of regional myocardial ischemia during acute pulmonary hypertension when right coronary artery stenosis is present [Priebe], A6

effect of pentobarbital on response to hypoxia in isolated sheep lungs [Martin & Wetzel], A326

effects of 70% nitrous oxide on, in dogs [Hasinoff, Papdimitropoulos & Prewitt], A103

effects of  $\alpha_1$ -adrenergic bolus administration in anesthetized patients [Schwinn, Clements, Hawkins, Kates & Reves], A72

effects of intrathecal perioperative morphine on [Chester, Schubert, Brandon, Pudimat & Pray], A267

effects of prostaglandin  $E_1$ , isoproterenol, prostacyclin, and nifedipine in porcine model of pulmonary hypertension [Prielipp, Pearl, McLean & Rosenthal], A154

evidence that endogenous leucotrienes do not play major role for hypoxic pulmonary vasoconstriction in pigs [Conzen, Zenker, Vollmar, Hobbhahn, Goetz, Martin & Brendel], A310

inhibition of hypoxic constriction: synthesis of vasodilator or consumption of substrate [Marshall, Ishibe & Marshall], A325

interactions between pulmonary capillary pressure, platelet microaggregates, and arachidonic acid derivatives in acute lung injury [Cope, Taylor, Longenecker, Fontenelle & Miller], A652

longitudinal distribution of, during unilateral hypoxia [Siegel, Pearl, Shafer & Ream], A554

low-dose almitrine besmesylate enhances hypoxic pulmonary vasoconstriction during canine one-lung hypoxia [Chen, Miller, Clarke, Clergue, Marshall & Marshall], A548

microhemodynamic changes in pulmonary microcirculation during hypoxic pulmonary vasoconstriction [Goetz, Conzen, Berger, Hobbhahn & Brendel], A309

propylene glycol produces pulmonary hypertension in sheep [Pearl & Siegel], A324

role of leukotrienes in hypoxic pulmonary vasoconstriction in sheep [Pearl & Prielipp], A549

systemic, is CVP the appropriate downstream pressure in calculations of [Beattie, Stevenson, Maruschak, Rosenfeld & Watkins], A87

tions of [Beattie, Stevenson, Maruschak, Rosenfeld & Watkins], A87

tosyl arginyl methyl ester (TAME) blocks thromboxane  $A_2$  mediated pulmonary vasoconstriction [Crowley, Gurtner & McShane], A109

during total knee replacement surgery with total condylar prosthesis [Tartiere, Gerard, Samii & Quesnel], A106

transhiatal esophagus resection and [Yakoubian, Bougeois, Marty, Marmuse & Desmonts], A119

vasodilator therapy in vasoconstrictor model of pulmonary hypertension in sheep [Prielipp, Pearl & Rosenthal], A104

#### volume

low, gas mixing during apnea and continuous flow ventilation at [Mackenzie, Moorman, Smith, Gundry, Coughlin & Hanks], A540

*Lymph, See under Blood*

## M

*MAC, See under Potency, anesthetic*

*Magnesium, See under Ions*

*Magnetic resonance imaging, See Measurement techniques, nuclear magnetic resonance*

*Malignant pyrexia, See under Hyperthermia*

#### Manpower

##### anesthesiologists

impact of liver transplant programs on [Spiess, Narbone, McCarthy, Rettke & Ivankovich], A568

presence of departmental substance abuse policy improves outcome of impaired personnel [Bell, Leighton, Mora & Seltzer], A566

##### nurse anesthetists

impact of liver transplant programs on [Spiess, Narbone, McCarthy, Rettke & Ivankovich], A568

##### residents

impact of liver transplant programs on [Spiess, Narbone, McCarthy, Rettke & Ivankovich], A568

*Mass spectroscopy, See under Measurement techniques*

*Measurement techniques, See also Monitoring*

##### blood pressure

adequacy of automated blood pressure cuffs with epinephrine test doses in beta blocked patients [Johnson, Hom & Mulroy], A187

from finger, noninvasive, continuous, effect of peripheral vascular disease on accuracy of [East, Pace, Sorenson, East & Westenskow], A186

on-line identification and analysis of, by use of rule-based knowledge representation [Mintz, Ford, Kaczorowski & Coyle], A203

systolic, Doppler vs. pulse oximeter for [Korbon, Wills, D'Lauro & Lawson], A188

##### calorimetry

indirect, metabolic rate in anesthetized infants and children measured by [Lindahl], A524

##### cardiac output

comparison of simultaneous intraoperative measurements by thermodilution, esophageal Doppler, and electrical impedance in anesthetized patients [Siegel, Shafer, Martinez, Ream & Scott], A181

evaluation of isoflurane and myocardial ischemia with [LaMantia, Acampora, Prokop, Ezekowitz, Slavik & Barash], A586

impedance cardiography vs. thermodilution in cardiac transplant patients [Mintz, Dirkes, Melvin, Silver & Denson], A213

intraoperative determination from transmitral and pulmonary

- blood flow measurements using transesophageal pulsed Doppler echocardiography [Roewer, Bednarz, Dziadzka & Schulte am Esch], A639
- measurement with Doppler ultrasound targeted by two-dimensional transesophageal echocardiography [Ellis, Runyon-Hass, Lichtor, Keamy & Roizen], A638
- noninvasive [Wong, Tremper, O'Connor, Wilbur, Wakabayashi & Zaccari], A643
- on-line identification and analysis of, by use of rule-based knowledge representation [Mintz, Ford, Kaczorowski & Coyle], A203
- by pulsed Doppler aortic implantable microprobes after cardiac surgery [Fratucci, Laborde, Dupuy, Grec & Payen], A637
- in third trimester preeclamptic vs. normal pregnant patients [Ellis, Reese & Blass], A634
- three-breath determination of, in infants and children [Morton], A486
- chromatography**
- mass spectrometry and, characterization of halothane oxidation by liver microsomes and purified cytochrome P-450 using [Waskell, Konopka, Gruenke & Koop], A314
- for circulating red cell volume [Hansen, Goetz, Conzen, Hobbhahn & Peter], A207
- computers**
- on-line identification and analysis of hemodynamic trends and patterns by use of rule-based knowledge representation [Mintz, Ford, Kaczorowski & Coyle], A203
- quantitative comparison of thenar electromyographic and force displacement signals during automated vecuronium infusion [Ebert, Carroll & Bradley Jr.], A343
- Doppler ultrasound**
- aortic implantable microprobes, monitoring of cardiac output by, after cardiac surgery [Fratucci, Laborde, Dupuy, Grec & Payen], A637
- comparison of simultaneous intraoperative measurements of cardiac output by thermodilution, electrical impedance and, in anesthetized patients [Siegel, Shafer, Martinez, Ream & Scott], A181
- comparison with thermodilution cardiac output [Wong, Tremper, O'Connor, Wilbur, Wakabayashi & Zaccari], A643
- esophageal, implications of interaction in sheep between mean arterial pressure and cross-sectional area of descending aorta for [List, Gravenstein, Banner, Caton & Davis], A178
- intraoperative cardiac output determination from transmitral and pulmonary blood flow measurements using [Roewer, Bednarz, Dziadzka & Schulte am Esch], A639
- preoperative, of cardiac index, prognostic value of [Belani & Estrin], A122
- pulse oximeter vs., systolic blood pressure measurement with [Korbon, Wills, D'Lauro & Lawson], A188
- targeted by two-dimensional transesophageal echocardiography, cardiac output measurement with [Ellis, Runyon-Hass, Lichtor, Keamy & Roizen], A638
- echocardiography**
- contrast, for intraoperative quantitation of myocardial perfusion [Segil, Dick, Feinstein & Silverman], A100
- myocardial contractility during halothane and isoflurane anesthesia assessed with [Mazzei, Dan, Scheller, Dittrich & Sahn], A590
- transesophageal**
- frequency with which ST segment trends predict intraoperative myocardial ischemia [Ellis, Roizen, Aronson, Feinstein & Briller], A2
- two-dimensional, cardiac output measurement by Doppler ultrasound targeted by [Ellis, Runyon-Hass, Lichtor, Keamy & Roizen], A638
- two-dimensional, comparison between radial arterial and central aortic pressure-volume relations with [Hillel, Thys, Goldman & Kaplan], A107
- two-dimensional, ejection fraction area on, correlation with gated radionuclide angiography of [Bruere, Coriat, Philip, Montejo, Fauchet, Cheour & Viars], A177
- two-dimensional, evaluation of isoflurane and myocardial ischemia with [LaMantia, Acampora, Prokop, Ezekowitz, Slavik & Barash], A586
- two-dimensional, intraoperative cardiac output determination from transmitral and pulmonary blood flow measurements using [Roewer, Bednarz, Dziadzka & Schulte am Esch], A639
- two-dimensional, mechanism of myocardial dysfunction during liver transplantation on, role of isolated right ventricular failure in [Ellis, Lichtor, Chung, Polk, Emond, Broelsch, Thistlethwaite, Feinstein & Roizen], A82
- two-dimensional, segmental wall motion in coronary artery disease patients evaluated by, after lumbar epidural anesthesia [Saada, Duval, Bonnet, Rey & Castillon], A270
- two-dimensional, usefulness of end systolic quotient and of fractional shortening for assessment of contractility changes under different loading conditions [Heinrich, Fontaine, Wilder-Smith, Winter & Ahnefeld], A209
- ejection fraction**
- changes in, peak systolic pressure-end systolic volume ratio correlates with, in canine model of septic shock [Hoffman, Natanson, Danner, MacVittie, Walker & Parrillo], A127
- effects of BW A938 U on [Konstadt, Thys, Reich, Keusch & Kaplan], A369
- evaluation of isoflurane and myocardial ischemia with [LaMantia, Acampora, Prokop, Ezekowitz, Slavik & Barash], A586
- improvement in, by lumbar epidural anesthesia, in patients with poor left ventricular function [Coriat, Benammar, Baron, Van Der Linden, Montejo, Bertrand, Daas & Viars], A259
- transesophageal 2D echocardiography correlated with gated radionuclide angiography [Bruere, Coriat, Philip, Montejo, Fauchet, Cheour & Viars], A177
- electrocardiography**
- frequency with which ST segment trends predict intraoperative myocardial ischemia [Ellis, Roizen, Aronson, Feinstein & Briller], A2
- preoperative silent myocardial ischemia in patients with unstable angina [Metzler, Gombotz, List & Rehak], A3
- electrodes**
- carbon dioxide**
- evaluation of new intra-arterial blood gas system in dogs and humans [Shapiro, Cane, Chomka & Gehrich], A640
- oxygen**
- evaluation of new intra-arterial blood gas system in dogs and humans [Shapiro, Cane, Chomka & Gehrich], A640
- electroencephalogram**
- processed, seizure detection using [Benthuyssen, Fung, Smith & Magliozzi], A214
- electromyography**
- automatic computer control of neuromuscular blockade [Quill, Reves, Jacobs & Glass], A641
- evoked, integrated, respiratory function and, following atracurium administration [Sharpe, Lam, Nicholas, Chung, Merchant, Alyafi & Beauchamp], A608
- thenar, quantitative comparison with force displacement signals during automated vecuronium infusion [Ebert, Carroll & Bradley Jr.], A343
- evoked potentials**
- following global cerebral ischemia, effects of superoxide dismutase on [Snelling, Ackerman, Dean, North & Traystman], A153

- increased amplitude of, with prior cerebellar stimulation [Erickson, McCaffrey & Ohira], A404
- steady state, 40 Hz, during isoflurane-N<sub>2</sub>O anesthesia [Hogan], A402
- Fick principle**
- three-breath determination of cardiac output in infants and children [Morton], A486
- mass spectroscopy**
- clinical utility of respiratory gas monitoring by [Guffin, Shamsi, Marlar, Mikula & Kaplan], A174
- emission spectrometry and, venous air embolism detection with, during normobaric and hyperbaric conditions [Russell, Snider, Richard & Loomis], A436
- gas chromatography and, characterization of halothane oxidation by liver microsomes and purified cytochrome P-450 using [Waskell, Konopka, Gruenke & Koop], A314
- high frequency response to halothane [Scamman], A176
- neuromuscular blockade**
- during automated vecuronium infusion, quantitative comparison of thenar electromyographic and force displacement signals during [Ebert, Carroll & Bradley Jr.], A343
- automatic computer control of [Quill, Reves, Jacobs & Glass], A641
- nuclear magnetic resonance**
- fluorine-19**
- isoflurane elimination from rabbit paralumbar muscle studied with [Wyrwicz, Conboy & Eisele], A407
- phosphorus-31**
- in vivo, noninvasive detection of malignant hyperthermia susceptibility by [Olgin, Argov, Rosenberg & Chance], A166
- rectal methohexital in children undergoing [Griswold & Liu], A494
- outcome analysis**
- are post coronary artery bypass patients still at risk [Khambatta, Sonntag, Larsen, Stephan, Stone & Kettler], A598
- after cardiac surgery, choice of anesthetic agent and [Tuman, McCarthy & Ivankovich], A597
- comparison of open and closed anesthesia circuits, patient safety and [Ernst, MacKrell, Pearson, Cutter & Wagenknecht], A474
- effect of two interventions on rate of anesthesia complications [Cooper, Cullen, Nemeskal, Gevirtz & Hoaglin], A466
- is ASA physical status classification adequate in predicting mortality in blunt trauma [Koch, McLellan, Wortzman, Bertram & Szalai], A482
- patient care evaluation system, patients' perception of anesthetic care and [Perlstein & Barash], A475
- perioperative myocardial ischemia as predictor of myocardial infarction and [Cheng, Chung, Burns, Houston & David], A594
- predictors of left ventricular function and mortality in post cardiopulmonary bypass period [Ossey, Hawkins, Reves & McIntyre], A596
- pulse oximetry and incidence of hypoxemia during recovery from anesthesia [Bushman, Morris, Warren, Philip & Raemer], A481
- risk of surgery and anesthesia, 1979 and 1983 [Lichtor, Roizen & Lane], A465
- survey of 3,244 consecutive admissions to post-anesthesia recovery room at university teaching hospital [Gewolb, Hines & Barash], A471
- pain**
- postoperative, in infants [Attia, Amiel-Tison, Mayer, Shnider & Barrier], A532
- pulse monitor**
- Doppler vs., systolic blood pressure measurement with [Korbon, Wills, D'Lauro & Lawson], A188
- on-line identification and analysis of trends and patterns by use of rule-based knowledge representation [Mintz, Ford, Kaczorowski & Coyle], A203
- radioactive tracers**
- dipyridamole thallium imaging in prediction of cardiac risk in patients scheduled for abdominal aortic surgery [Bertrand, Godet, Baron, Coriat, Mundler, Fauchet & Viars], A117
- peak systolic pressure-end systolic volume ratio correlates with changes in ejection fraction in canine model of septic shock [Hoffman, Natanson, Danner, MacVittie, Walker & Parrillo], A127
- technetium pyrophosphate, prediction of myocardial infarction by [Cheng, Chung, Burns, Houston & David], A594
- transesophageal 2D echocardiography ejection fraction area on, correlation with [Bruere, Coriat, Philip, Montejo, Fauchet, Cheour & Viars], A177
- thermodilution cardiac output**
- comparison of simultaneous intraoperative measurements of cardiac output by esophageal Doppler, electrical impedance and, in anesthetized patients [Siegel, Shafer, Martinez, Ream & Scott], A181
- comparison of two different methods with [Wong, Tremper, O'Connor, Wilbur, Wakabayashi & Zaccari], A643
- impedance cardiography vs., cardiac outputs determined by, in cardiac transplant patients [Mintz, Dirkes, Melvin, Silver & Denson], A213
- thrombelastography**
- and changes in blood coagulation following cardiopulmonary bypass [Newland, Chapin, Hurlbert, Kennedy & Newland], A199
- for prediction and assessment of management of excessive bleeding after open heart surgery [Logas, Spiess, Hughes, McCarthy, Jaimovich & Ivankovich], A142
- tomography**
- computerized cranial, rectal methohexital in children undergoing [Griswold & Liu], A494
- perioperative myocardial ischemia as predictor of myocardial infarction and [Cheng, Chung, Burns, Houston & David], A594
- positron emission, myocardial beta-adrenergic density is decreased by halothane in dogs as assessed by [Maze, Marty, Seto, Crouzel, Valloise, Crouzel, Lancon & Syrota], A55
- Mechanical ventilation, See under Ventilation**
- Medical students, See under Education**
- Medicolegal**
- effect of detailed anesthesia consent form on patient recall and anxiety [Leighton, Bauman, Seltzer & Menduke], A567
- Membrane oxygenator, See under Surgery, cardiovascular, oxygenator**
- Memory**
- neurocognitive profile of midazolam induced amnesia [Galus, Pohorecki, French, Pandit & Domino], A418
- patient recall, effect of detailed anesthesia consent form on [Leighton, Bauman, Seltzer & Menduke], A567
- postoperative, spontaneous and purposeful movement as predictor of, during fentanyl/nitrous oxide/diazepam anesthesia [Stolzy, Couture & Edmonds Jr.], A376
- postoperative recognition test after balanced anesthesia [Stolzy, Couture & Edmonds Jr.], A377
- time course of lorazepam induced auditory amnesia, relationship of, to cognitive evoked potentials in humans [Samra, Bradshaw, Pandit, Moore & Papanicolaou], A420
- Meperidine, See under Analgesics, narcotic**
- Mephentermine, See under Sympathetic nervous system, sympathomimetic agents**
- Mepivacaine, See under Anesthetics, local**

**Metabolism, See also Biotransformation (drug); individual organs**

**adenosine monophosphate**

sympathetic blockade vs., for prevention and treatment of postherpetic neuralgia [Brookshire, Cook & Sklar], A247

**adenosine triphosphate**

changes in regional myocardial blood flow and oxygen tension during induced hypotension in subhuman primates [Fukunaga, Ito, Iijim, Kubota & Miyamoto], A8

in anesthetized infants and children, measurement of, by indirect calorimetry [Lindahl], A524

**diabetes**

difficult laryngoscopy in [Hogan, Rusy & Springman], A473

increased intraoperative cardiovascular morbidity with autonomic neuropathy [Burgos, Asiddao, Ebert, Pattison & Kampine], A66

myocardial myosin isoenzyme shifts and effects of halothane on cardiac contractility in non-insulin treated spontaneously diabetic rats [Baum, Miletich, Clarke & Pelligrino], A95

**fatty acids**

phosphoinositide analysis in rats with altered volatile anesthetic sensitivity [Haycock & Evers], A378

**glucose**

prognostic significance of levels during liver transplantation [Mallett, Kang, Freeman, Aggarwal, Gasior & Fortunato], A313

uptake, potassium uptake and, dissociation of responses to hyperinsulinemia in critically ill patients [Shangraw, Miyoshi, Jahoor, Stuart, Neff & Wolfe], A129

**hyperglycemia**

neuronal ischemic changes after middle cerebral artery occlusion decreased by, in cat [Zasslow, Pearl, Shuer, Lieberman, Steinberg & Larson Jr.], A581

**hypoglycemia**

effect on cerebral metabolism and cerebrovascular responsivity of [Sieber, Derrer, Saudek & Traystman], A572

**insulin**

dissociation of potassium and glucose uptake responses to hyperinsulinemia in critically ill patients [Shangraw, Miyoshi, Jahoor, Stuart, Neff & Wolfe], A129

**lipid**

of secondary alcohol stereoisomers [Firestone, Alifimoff & Miller], A380

total parenteral nutrition with, enhancement of bacterial elimination and attenuation of hemodynamic derangements of sepsis from [Doty, Dehring, Kraft, Traber & Herndon], A150

**metabolites**

atracurium, pharmacokinetics of, in normal and renal failure patients [van den Brom, Wierda & Agoston], A606

electrophilic, formed from atracurium, quantitation of, in vivo [Pandya, Nigrovic, Gallup & Fry], A603

**microsomes, See under Biotransformation (drug)**

pentobarbital selectively inhibits phosphatidylinositol hydrolysis in cultured vascular endothelial cells [Robinson-White, Robinson & Muldoon], A315

**respiratory quotient**

predicted vs. measured energy requirement [Fallon, Tonnesen, Maslovitz & Hernandez], A158

**ribose**

effect of administration on contractile recovery following brief periods of ischemia [Sami & Bittar], A74

**uridine**

CSF, reduced, in head injury patients [Rosner, Mueller, Ghia, Hunt & Coley], A429

**Metabolites, See under Metabolism**

**Methadone, See under Analgesics, narcotic**

**Methemoglobinemia, See under Blood**

**Methionine synthase, See under Enzymes**

**Methohexital, See under Anesthetics, intravenous; Hypnotics, barbiturates**

**Methoxyflurane, See under Anesthetics, volatile**

**Metoclopramide, See under Vomiting, antiemetics**

**Metocurine, See under Neuromuscular relaxants**

**Microcirculation**

**brain**

different response of bolus or continuous infusion of sufentanil on [Lu, Prinscott, Frost, Gibson & Goldiner], A89

during isoflurane and enflurane [Goetz, Conzen, Schmidt, Hobbahn, Peter & Brendel], A7

**lung**

microhemodynamic changes in, during hypoxic pulmonary vasoconstriction [Goetz, Conzen, Berger, Hobbahn & Brendel], A309

**Microsomes, See under Biotransformation (drug)**

**Midazolam, See under Anesthetics, intravenous; Hypnotics, benzodiazepines**

**Milrinone, See under Pharmacology**

**Minimum alveolar concentration, See Potency, anesthetic, MAC**

**Monitoring, See also Equipment; Measurement techniques**

**angiocardigraphy**

radionuclide, assessment of wall motion during endotracheal intubation by [Sell, Croughwell, Camporesi, Jones & Reves], A27

**carbon dioxide**

automated analysis of capnograms [Duranteau, Deriaz, Schurandau, Rader & Payen], A196

comparison of two noninvasive estimates in critically ill neonates [McEvedy, McLeod, Munini, Kirpalani & Lerman], A485

end-tidal measurements in infants after cardiac surgery [Wessel, Boyd III & Hickey], A175

**electrocardiography**

changes following neurosurgery [Morales Jr., Shapiro, Donegan, Bird, Buycke, Rupp, Wickersham & Rampil], A65

phrenic nerve stimulation triggered by, transient analysis of respiration using [Peters, Kindred & Robotham], A81

**electroencephalography**

for monitoring anesthetic depth for alfentanil with N<sub>2</sub>O [Stanski, Vuyk, Ausens, Arts, Kramer & Spierdijk], A401

pharmacological quantitation of midazolam's CNS drug effect in hypnotic doses [Buhner, Maitre, Ebling & Stanski], A658

processed, seizure detection using [Benthuyssen, Fung, Smith & Magliozzi], A214

relationship of thiopental's steady state plasma concentration to [Buhner, Maitre, Ebling & Stanski], A399

**oxygen**

accuracy of pulse oximetry in cyanotic congenital heart disease [Lazzell & Jopling], A169

comparison of two mixed-venous saturation catheters in critically ill patients [Reinhart, Moser, Rudolph, Gramm, Goecke & Eyrich], A182

correction for body temperature during hypothermia [Moon & Camporesi], A20

desaturation during cemented hip replacement [Rosenberg, Bernstein, Bernstein & Ramanathan], A551

effect of premedication in cardiac patient prior to transport to operating room [Hensley Jr., Dodson, Larach, Martin & High], A4

effect of sevoflurane on P<sub>50</sub> and PO<sub>2</sub> measurements [Kambam, Holaday, Horton & Parris], A198

effects of methemoglobinemia on [Barker, Tremper, Hyatt & Zaccari], A171

and incidence of hypoxemia during recovery from anesthesia [Buschman, Morris, Warren, Philip & Raemer], A481

- local anesthesia and [Kitz, Aukburg & Lecky], A264  
and marked hypoxemia after gastropasty due to disorders of breathing in REM sleep [Knill, Moote, Rose & Skinner], A552  
on-line identification and analysis of trends and patterns by use of rule-based knowledge representation [Mintz, Ford, Kaczorowski & Coyle], A203  
prevention of hypoxemia during postoperative transport in children [Patel, Norden & Hannallah], A529  
pulse oximetry may not detect endobronchial intubation [Barker, Tremper, Hyatt, Zaccari & Thaurer], A170  
real-time continuous estimation of gas exchange by dual oximetry [Rasanen, Downs, DeHaven & Garner], A173  
time course of hemoglobin desaturation during immediate postanesthetic period in children [Motoyama, Borland & Mutich], A508
- pulse oximetry**  
accuracy in cyanotic congenital heart disease [Lazzell & Jopling], A169  
and detection of endobronchial intubation [Barker, Tremper, Hyatt, Zaccari & Thaurer], A170  
effects of methemoglobinemia on [Barker, Tremper, Hyatt & Zaccari], A171  
and incidence of hypoxemia during recovery from anesthesia [Buschman, Morris, Warren, Philip & Raemer], A481
- somatosensory evoked potentials**  
cerebral blood flow and, relationship between, during graded incomplete ischemia in goats under general anesthesia [Kochs & Schulte am Esch], A403  
phenylephrine vs. epinephrine and, during and following cardiopulmonary resuscitation in dogs [Schleien, Koehler, Berkowitz, Dean, Gervais, Michael, Rogers & Traystman], A650  
posterior tibial nerve, effects of high dose sufentanil or alfentanil anesthesia on [Kalkman, van Rheineck Leyssius, Hesselink & Bovill], A386
- temperature**  
esophageal temperature distribution implications for [Kaufman], A205  
use of auditory alarms in operating room [Kestin, Miller & Lockhart], A191
- Morphine, See under Analgesics, narcotic; Anesthetics, intravenous**  
**Muscle, skeletal, See also Neuromuscular entries**  
**blood flow**  
during isoflurane and enflurane [Goetz, Conzen, Schmidt, Hobbhahn, Peter & Brendel], A7  
**contractility**  
diaphragmatic, and recovery after atracurium [Goldman, Road & Grassino], A329  
cultured, from patients susceptible to malignant hyperthermia, patch clamp whole-cell currents in [Wieland, Fletcher & Rosenberg], A318  
**diaphragm**  
activity of, after upper abdominal surgery, effects of thoracic extradural block on [Pansard, Philip, Bahini, Brichant, Delima, Mankikian & Viars], A537  
contractility and recovery after atracurium [Goldman, Road & Grassino], A329  
human, dose-response curves for vecuronium on [Chauvin, Lebrault & Duvaldestin], A348  
neuromuscular blocking effect of atracurium on [Chauvin, Lebrault, Gauneau & Duvaldestin], A349  
paralumbur, rabbit, isoflurane elimination from, <sup>19</sup>F NMR spectroscopy study of [Wyrwicz, Conboy & Eisele], A407  
**rigidity**  
alfentanil-induced, in rat, localization of brain sites that may play role in [Weinger, Cline, Blasco, Smith & Koob], A384  
decrease in, with time, despite constant levels of neuromuscular blockade [Ensalada, Muravchick, Rosato, DeFeo & Weber], A431  
role in pattern of breathing after abdominal surgery [Raimbault, Dureuil, Veber & Desmonts], A536
- sarcoplasmic reticulum**  
halothane directly inhibits function of, in intact myocardium [Komai & Rusy], A54  
isolated membranes, effects on Ca<sup>++</sup> transport and CA<sup>++</sup> channel release functions in, of halothane vs. enflurane vs. isoflurane [Nelson & Sweo], A300  
isolated rabbit white skeletal muscle, effects of volatile anesthetics on spontaneous calcium release from [Peterson Jr., Baroody & Blanck], A317  
in skinned myocardial fibers of newborn and adult rabbit, effects of halothane on function of [Krane & Su], A93  
vocal cord vs. thenar neuromuscular blockade with vecuronium in man [Gilly, Redl, Werba, Streinzer, Draxler & Spiss], A614
- Myocardium, See under Heart**
- N**
- Nalbuphine, See under Analgesics, narcotic**  
**Naloxone, See under Antagonists, narcotic**  
**Narcotic analgesics, See Analgesics, narcotic**  
**Narcotic antagonists, See Antagonists, narcotic**  
**Nausea, See under Vomiting**  
**Needles, See under Equipment**  
**Neostigmine, See under Antagonists, neuromuscular relaxants**
- Nerve**  
**block, See Anesthetic techniques, regional**  
**conduction**  
ketamine effects in peripheral nervous system [Tabatabai, deGroat, Booth & Kirmli], A427  
**damage, See under Complications; Position**  
**sciatic**  
rat, intact, effects of pH-adjusted lidocaine solutions on compound action potential in [Okamura, Reisner & Kalichman], A281  
**stimulator, See under Equipment; Neuromuscular (transmission, stimulator, nerve**
- tibial**  
common peroneal and, combined interosseous blocks, for foot surgery [Shulman, Peng, Nyunt, Kepes & Blancato], A288  
posterior, somatosensory evoked potentials, effects of high dose sufentanil or alfentanil anesthesia on [Kalkman, van Rheineck Leyssius, Hesselink & Bovill], A386
- Neurologic complications, See under Complications**  
**Neuromuscular blockade, See under Measurement techniques**  
**Neuromuscular relaxants, See also Antagonists, neuromuscular relaxants**
- atracurium**  
activity of, in halothane anesthetized horses, trichlorfon does not alter [Hildebrand, Holland & Hill], A350  
administration in divided doses does not accelerate onset of action [Brady, Mirakhur, Clarke & Gibson], A347  
assessment of evoked acceleration response during recovery from [Werner, Jensen, Kirkegaard Nielsen & Viby-Mogensen], A344  
cerebrospinal fluid laudanosine kinetics in children [Harris, Stirt, Broadus & Cook], A506  
correlation between integrated evoked EMG and respiratory function following administration of [Sharpe, Lam, Nicholas, Chung, Merchant, Alyafi & Beauchamp], A608  
diaphragmatic contractility and recovery after [Goldman, Road & Grassino], A329

- effect on human diaphragm [Chauvin, Lebrault, Gauneau & Duvaldestin], A349
- in elderly, pharmacokinetics and pharmacodynamics of [deBros, Okutani, Lai, Lawrence & Basta], A604
- electrophilic metabolites formed from, quantitation of, in vivo [Pandya, Nigrovic, Gallup & Fry], A603
- and inhibition of plasma cholinesterase and degradation in vitro [Kupferberg, James & Seals], A602
- and metabolites, pharmacokinetics of, in normal and renal failure patients [van den Brom, Wierda & Agoston], A606
- neuromuscular block induced by, prolongation of, in hepatic vascular occlusion [Tsai, Lee & Mok], A605
- pharmacodynamics of, in obese [Weinstein, Matteo, Ornstein, Goldstoft & Thal], A346
- pharmacokinetics and pharmacodynamics of, phenytoin does not interfere with [deBros, Okutani, Lai, Lawrence & Basta], A607
- relationship between twitch depression and train-of-four fade [Durant, Nguyen & Katz], A333
- tetanic fade following administration of [Mirakhur, Gibson & Clarke], A334
- BW A938U**
- cumulative dose-response relationships of, during four anesthetic techniques [Katz, Fragen, Shanks, Dunn, McNulty & Williams], A361
- does not trigger malignant hyperthermia in susceptible swine [Kreul, Suftit, Brunson, Bellay & Will], A299
- dose response of, in children [Goudsouzian, Alifimoff, Liu, Embree, McNulty & Foster], A366
- effect of succinylcholine on subsequent neuromuscular blockade with [Forbes, Mehta, Murray, Choi, Sokoll, Gergis, Rudd, Krol, Abou-Donia & Cotten], A363
- effects of anesthesia and dosage on neuromuscular blockade with [Katz, Fragen, Shanks, Dunn, Rudd & Williams], A364
- hemodynamic effects of, in coronary artery bypass graft and valve replacement patients receiving oxygen sufentanil anesthesia [Stoops, Cunis, Kovach, McCammon, Stoelting & Warren], A368
- hemodynamic effects of [Konstadt, Thys, Reich, Keusch & Kaplan], A369
- isoflurane, halothane, and narcotic anesthetic dose-response for [Lynam, Caldwell & Miller], A362
- neuromuscular effects of, in anesthetized children [Sarnier, Brandom, Woelfel, Horn, Cook, Dong, Davis, Foster & McNulty], A365
- pancuronium vs., cardiovascular and neuromuscular effects of [Murray, Mehta, Forbes, Choi, Sokoll, Gergis, Krol & Abou-Donia], A367
- BW B1090U**
- by bolus injections, dose-duration relationship of [Lee, Cheng, Yang, Cantley, Harris, Weakly & Whitehead], A353
- cardiovascular effects during nitrous oxide-oxygen-narcotic anesthesia [Forbes, Choi, Mehta, Murray, Sokoll, Gergis, Douglas & Abou-Donia], A360
- infusion requirements in adults during isoflurane or narcotic anesthesia [Powers, Weber, Brandom, Byers, Simpson, Sarnier, Woelfel, Cook, McNulty & Foster], A359
- in vitro metabolism of [Cook, Stiller, Chakravorti, Welch & Brandom], A610
- neuromuscular effects in patients under narcotic-N<sub>2</sub>O anesthesia [Choi, Mehta, Murray, Forbes, Sokoll, Gergis, Krol, Abou-Donia & Cotten], A355
- neuromuscular effects in patients under narcotic-N<sub>2</sub>O anesthesia [Lee, Cheng, Yang, Cantley, Harris, Weakly & Whitehead], A354
- pharmacokinetics and pharmacodynamics of, in healthy surgical patients receiving N<sub>2</sub>O/O<sub>2</sub> isoflurane anesthesia [deBros, Basta, Ali, Wargin & Welch], A609
- relative potency during isoflurane or thiopental-fentanyl anesthesia [Weber, Brandom, Powers, Sarnier, Woelfel, Cook, Foster & Weakly], A356
- sixty-second tracheal intubation with, after fentanyl-thiopental induction [Savarese, Ali, Basta, Embree & Risner], A351
- succinylcholine vs., for facilitation of endotracheal intubation in outpatient surgical unit [McPeck, Nozik, Walzer, Embree & Schwartz], A352
- dantrolene**
- and antagonism of synergistic hemolysis of human red blood cells by halothane and phospholipase A<sub>2</sub> [Fletcher, Kistler, Rosenberg, Michaux & Tripolitis], A298
- metocurine**
- pharmacokinetics and pharmacodynamics of, in infants, children, and adults [Weinstein, Matteo, Ornstein, Goldstoft & Diaz], A615
- pancuronium**
- BW A938U vs., cardiovascular and neuromuscular effects of [Murray, Mehta, Forbes, Choi, Sokoll, Gergis, Krol & Abou-Donia], A367
- nitrous oxide increases neuromuscular blocking effect of [Kinjo, Nagashima, Duncalf, Goldiner & Folds], A372
- pharmacokinetics and cardiovascular effects of, in CABG patients [Wierda, Karliczek, van den Brom, Kersten-Kleef & Agoston], A613
- pipecuronium vs., pharmacokinetics and duration of action of [Caldwell, Castagnoli, Canfell, Fahey, Lynam, Fisher & Miller], A611
- tetanic fade following administration of [Mirakhur, Gibson & Clarke], A334
- vecuronium vs., cardiovascular effects of, in premature infants with hyaline membrane disease [Hamza, Macquin, Wood, Devictor & Huault], A515
- pipecuronium**
- dose-response evaluation of, in elderly population, under balanced anesthesia [Azad, Goldberg, Larjani, Ritter, Marr, Beach & Seltzer], A370
- pancuronium vs., pharmacokinetics and duration of action of [Caldwell, Castagnoli, Canfell, Fahey, Lynam, Fisher & Miller], A611
- pharmacokinetics and cardiovascular effects of, in CABG patients [Wierda, Karliczek, van den Brom, Kersten-Kleef & Agoston], A613
- pharmacokinetics and duration of action of, influence of renal failure on [Caldwell, Canfell, Castagnoli, Lynam, Fahey, Fisher & Miller], A612
- potency and duration of action not increased by preliminary administration of succinylcholine [Chae, Nguyen, Nagashima, Goldiner, Duncalf & Folds], A371
- succinylcholine**
- BW B1090U vs., for facilitation of endotracheal intubation in outpatient surgical unit [McPeck, Nozik, Walzer, Embree & Schwartz], A352
- dose-response curves for, single vs. cumulative techniques [Smith, Donati & Bevan], A358
- effect on recovery from vecuronium, comparing orbicularis oculi and adductor pollicis muscle [Joseph & Beatie], A342
- effect on subsequent neuromuscular blockade with BW A938U [Forbes, Mehta, Murray, Choi, Sokoll, Gergis, Rudd, Krol, Abou-Donia & Cotten], A363
- long term sterility of diluted or pre-drawn solutions of [Mayweather, Santos, Juneja & Stanek], A160
- preliminary administration of, does not increase potency and du-

- ration of action of pipecuronium [Chae, Nguyen, Nagashima, Goldiner, Duncalf & Foldes], A371
- d-tubocurarine**
- azathioprine fails to alter dose-response curve of [Glidden, Jeevendra Martyn & Tomera], A357
  - long term sterility of diluted or pre-drawn solutions of [Mayweather, Santos, Juneja & Stanek], A160
  - nitrous oxide increases neuromuscular blocking effect of [Kinjo, Nagashima, Duncalf, Goldiner & Foldes], A372
  - tetanic fade following administration of [Mirakhur, Gibson & Clarke], A334
- vecuronium**
- administration in divided doses does not accelerate onset of action [Brady, Mirakhur, Clarke & Gibson], A347
  - assessment of evoked acceleration response during recovery from [Werner, Jensen, Kirkegaard Nielsen & Viby-Mogensen], A344
  - automated infusion of, quantitative comparison of thenar electromyographic and force displacement signals during [Ebert, Carroll & Bradley Jr.], A343
  - changes in intraocular pressure during rapid sequence induction of anesthesia using propofol or thiopental with [Elliott, Mirakhur & Shepherd], A483
  - dose-response curves on human diaphragm [Chauvin, Lebrault & Duvaldestin], A348
  - duration of neuromuscular blockade with, influence of H<sub>2</sub> blockers on, in postpartum patients vs. nonpregnant controls [Tessen, Adenwala, Camp & Joyce], A451
  - effect of succinylcholine on recovery from, comparing orbicularis oculi and adductor pollicis muscle [Joseph & Beatie], A342
  - following induction of anesthesia with propofol or thiopental, intraocular pressure during, influence of additional dose of induction agent on [Elliott, Mirakhur & Shepherd], A484
  - high dose, onset, duration, and recovery following [Ginsberg, Glass, Shafron, Mace, Quill & Mardekian], A341
  - negative chronotropic actions in chronically instrumented dogs pretreated with propranolol and/or diltiazem [Schmeling, Kampine, Bernstein & Wartier], A90
  - pancuronium vs., cardiovascular effects of, in premature infants with hyaline membrane disease [Hamza, Macquin, Wood, Devictor & Huault], A515
  - pharmacodynamics of, in obese [Weinstein, Matteo, Ornstein, Goldstoft & Thal], A346
  - pharmacodynamics of, in two muscle groups [Gilly, Redl, Werba, Streinzer, Draxler & Spiss], A614
  - for rapid sequence induction in patients undergoing cesarean section [Tessen, Johnson, Skjonsby, Kubicek & Joyce], A452
  - relationship between twitch depression and train-of-four fade [Durant, Nguyen & Katz], A333
  - resistance to, in patients receiving carbamazepine [Bulkley, Ebrahim, Roth, DeBoer & Run], A345
  - tetanic fade following administration of [Mirakhur, Gibson & Clarke], A334
- Neuromuscular transmission**
- abdominal wall tension decreases with time despite constant levels of neuromuscular blockade [Ensalada, Muravchick, Rosato, DeFeo & Weber], A431
- paralysis**
- depletion of readily releasable acetylcholine stores [Foldes, Chaudhry, Kinjo & Nagashima], A338
  - posttetanic responses in evaluation of profound nondepolarizing neuromuscular block [Gyermek], A335
  - prejunctional effects of potent inhalation anesthetics in man and cat [Stanec & Baker], A336
  - vesamicol inhibits uptake of acetylcholine by synaptic vesicles [Nagashima, Kinjo, Chaudhry & Foldes], A337
  - in preeclamptic women receiving magnesium sulfate [Ramanathan, Sibai, Pillai & Angel], A633
- stimulator, nerve**
- posttetanic responses in evaluation of profound nondepolarizing neuromuscular block [Gyermek], A335
  - prejunctional effects of potent inhalation anesthetics in man and cat [Stanec & Baker], A336
  - relationship between twitch depression and train-of-four fade [Durant, Nguyen & Katz], A333
  - tetanic fade following administration of nondepolarizing neuromuscular blocking agents [Mirakhur, Gibson & Clarke], A334
- Neurosurgery, See under Surgery**
- Neurosurgical anesthesia, See under Anesthesia**
- Neurotoxicity, See under Toxicity**
- Nicardipine, See under Ions, calcium channel blockers**
- Nifedipine, See under Ions, calcium channel blockers**
- Nimodipine, See under Ions, calcium channel blockers**
- Nisoldipine, See under Ions, calcium channel blockers**
- Nitrogen, See under Hyperbaria**
- Nitrogen analyzer, See under Equipment**
- Nitroglycerin, See under Anesthetic techniques, hypotension, induced**
- Nitroprusside, See under Anesthetic techniques, hypotension, induced**
- Nitrous oxide, See under Anesthetics, gases**
- NMR, See Measurement techniques, nuclear magnetic resonance**
- Nonbreathing circuits, See under Equipment, circuits**
- Norepinephrine, See under Sympathetic nervous system, catecholamines**
- Nuclear magnetic resonance, See under Measurement techniques**
- Nurse anesthetists, See under Manpower**
- Nutrition**
- parenteral
    - with lipid, enhancement of bacterial elimination and attenuation of hemodynamic derangements of sepsis from [Doty, Dehring, Kraft, Traber & Herndon], A150
- O**
- Obesity, See under Complications**
- Obstetric anesthesia, See under Anesthesia**
- Occlusion, coronary, See under Heart**
- Open circuits, See under Equipment, circuits**
- Operating rooms**
- anesthesia simulation in actual environment of [Gaba & DeAnda], A467
  - temperature
    - heat loss and [English, Searle & Scott], A162
    - use of auditory alarms in [Kestin, Miller & Lockhart], A191
- Opioids, See Analgesics, narcotic**
- Organizations**
- American Society of Anesthesiologists
    - physical status classification of, adequacy of, in predicting mortality in blunt trauma [Koch, McLellan, Wortzman, Bertram & Szalai], A482
- Orthopedic anesthesia, See under Anesthesia**
- Orthopedic surgery, See under Surgery**
- Outcome analysis, See under Measurement techniques**
- Outpatient anesthesia, See under Anesthesia**
- Oximeter, pulse, See under Equipment**
- Oximetry, pulse, See under Monitoring**
- Oxygen, See also under Hypoxia; Monitoring**
- apneic oxygenation in pediatric patients [Kernisan, Adler, Gibbons & Runions], A521

- blood levels  
in children with congenital heart disease, effect of premedication on [De Bock, Petrilli, Davis & Motoyama], A492  
pulmonary gas exchange and [Rasanen, Downs & Oates], A172  
consumption, *See under individual organs*  
cyanosis  
accuracy of pulse oximetry in [Lazzell & Jopling], A169  
oxyhemoglobin saturation  
pulmonary gas exchange and [Rasanen, Downs & Oates], A172  
oxyhemoglobin-dissociation curve  
effect of sevoflurane on  $P_{50}$  and  $PO_2$  measurements [Kambam, Holaday, Horton & Parris], A198  
effects of inositol hexaphosphate induced high  $P_{50}$  on isolated rabbit heart with free and limited coronary blood flow [Baron, Vicaut, Stucker, Villereal, Ropars, Teisseire, Viars & Duvelloy], A102  
saturation  
changes among patients receiving local anesthesia [Kitz, Aukburg & Lecky], A264  
in children with congenital heart disease, effect of premedication on [De Bock, Petrilli, Davis & Motoyama], A492  
continuous, effect of premedication in cardiac patient prior to transport to operating room [Hensley Jr., Dodson, Larach, Martin & High], A4  
tension  
alveolar, comparison of two formulas for calculation of, in canine oleic acid-induced pulmonary edema [Johnston, Vinten-Johansen, Bowton, Strickland & Royster], A110  
changes during induced hypotension with nitroglycerin, isoflurane and ATP in subhuman primates [Fukunaga, Ito, Iijima, Kubota & Miyamoto], A8  
effects of hypocapnia and hypercapnia on liver surface  $PO_2$  in dog [Okazaki, Okutsu, Numata & Fukunaga], A88  
intravenous clonidine produces hypoxemia [Eisenach], A49  
pulmonary gas exchange and [Rasanen, Downs & Oates], A172  
Oxygen electrodes, *See under Measurement techniques, electrodes*  
Oxygenator, *See under Surgery, cardiovascular*  
Oxyhemoglobin dissociation, *See under Blood*  
Oxyhemoglobin saturation, *See under Oxygen*  
Oxyhemoglobin-dissociation curve, *See under Oxygen*  
Oxymorphone, *See under Analgesics, narcotic*

## P

- Pacemakers, *See under Equipment*  
 $PaCO_2$ , *See Carbon dioxide, hypercarbia; Carbon dioxide, hypocarbia*  
Pain, *See also under Analgesia; Analgesics; Measurement techniques*  
cancer, metastatic, epidural butamben for treatment of [Shulman], A245  
experimental  
visceral, chronic model for, in rat [Coombs, Colburn, Degnan & Rogers], A673  
visceral, in pregnant rats, failure of intrathecal nalbupine to suppress [Marando, Sinatra, Fu & Collins], A447  
intractable, in cancer patients, morphine injections in cisterna magna for [Schoeffler, Haberer, Monteillard & Bouetard], A246  
measurement  
visceral, chronic model for, in rat [Coombs, Colburn, Degnan & Rogers], A673  
pathologic  
postherpetic neuralgia, sympathetic blockade vs. adenosine monophosphate for prevention and treatment of [Brookshire, Cook & Sklar], A247

- Pancuronium, *See under Neuromuscular relaxants*  
Paralysis, *See under Neuromuscular transmission*  
Parasympathetic nervous system  
atropine  
and inhibition of effect of metoclopramine pretreatment on gastric contents in morbidly obese patient [Goldberg, Norris, Larijani, Marr & Seltzer], A289  
Parenteral nutrition, *See under Nutrition*  
Pediatric anesthesia, *See under Anesthesia*  
Pediatric surgery, *See under Surgery*  
PEEP, *See Ventilation, positive end-expiratory pressure*  
Pentazocine, *See under Analgesics, narcotic*  
Pentobarbital, *See under Anesthetics, intravenous; Hypnotics, barbiturates*  
Peridural anesthesia, *See Anesthetic techniques, peridural*  
Peridural space, *See under Anatomy*  
 $pH$ , *See under Acid-base equilibrium*  
Pharmacodynamics  
atracurium, in elderly [deBros, Okutani, Lai, Lawrence & Basta], A604  
atracurium, phenytoin does not interfere with [deBros, Okutani, Lai, Lawrence & Basta], A607  
BW B1090U, in healthy surgical patients receiving  $N_2O/O_2$  isoflurane anesthesia [deBros, Basta, Ali, Wargin & Welch], A609  
chronically instrumented rat model for combined pharmacokinetic and CNS pharmacodynamic assessment of anesthetics [Ebling, Burm, Field & Stanski], A674  
metocurine, in infants, children, and adults [Weinstein, Matteo, Ornstein, Goldstoft & Diaz], A615  
 $^3H$ -morphine, in rat spinal cord, following intrathecal administration [Nishio, Kitahata, Murata, Sinatra & Collins], A394  
pediatric rectal methohexitone induction with and without rectal suctioning after sleep [Kestin, McIlvaine, Lockhart, Kestin & Jones], A493  
propofol infusions [Shafer, Shafer, Doze & White], A668  
vecuronium, in two muscle groups [Gilly, Redl, Werba, Streinzer, Draxler & Spiss], A614  
vecuronium and atracurium, in obese [Weinstein, Matteo, Ornstein, Goldstoft & Thal], A346  
Pharmacokinetics  
acebutolol blood levels during hypothermic cardiopulmonary bypass [Mantz, Marty, Blanchot, Trouvin, Farinotti & Desmonts], A13  
age and intravascular mixing during induction with thiopental [Henthorn, Krejcie & Avram], A663  
alfentanil, in piglet [Davis, Stiller, Cook, Ingram & Roeber], A505  
alterations of benzodiazepines used for anesthesia, influence of, on residual sedation in elderly [Servin, Luscombe, Farinotti & Desmonts], A656  
amrinone, in infants [Lawless, Burckart, Thompson & Siewers], A145  
atracurium, in elderly [deBros, Okutani, Lai, Lawrence & Basta], A604  
atracurium, phenytoin does not interfere with [deBros, Okutani, Lai, Lawrence & Basta], A607  
atracurium and metabolites, in normal and renal failure patients [van den Brom, Wierda & Agoston], A606  
atracurium induced neuromuscular block is prolonged in hepatic vascular occlusion [Tsai, Lee & Mok], A605  
BW B1090U, in healthy surgical patients receiving  $N_2O/O_2$  isoflurane anesthesia [deBros, Basta, Ali, Wargin & Welch], A609  
during cardiac arrest [Emerman, Pinchak, Hancock & Hagen], A149  
chronically instrumented rat model for combined pharmacokinetic and CNS pharmacodynamic assessment of anesthetics [Ebling, Burm, Field & Stanski], A674



**diffusion**

bubble oxygenators and [Nussmeier, Moskowitz, Weiskopf, Cohen & Eger II], A197

**distribution**

bubble oxygenators and [Nussmeier, Moskowitz, Weiskopf, Cohen & Eger II], A197

of <sup>3</sup>H-morphine, following lumbar epidural administration in rabbits [Wang, Hiller, Holland, Simon, Hillman & Turn-dorf], A253

effects of age on plasma protein binding of sufentanil [Meistelman, Benhamou, Mahe, Levron, Mazoit, Ecoffey & Truffa-Bachi], A518

fentanyl, administered by computer controlled infusion pump [Shafer, Martinez, Stanski & Scott], A666

fentanyl, during continuous infusion in critically ill patients [Alazia, Levron, Guidon & Francois], A665

hepatic clearance of sufentanil in humans [Schedewie, Lee, Cowan, Gold, Bottorff, Peters, Heerdt & Angel], A291

intravenous lidocaine, in pediatrics, effect of age on [LeDez, Strong, Reider, Burrows & Lerman], A500

intravenous lidocaine, in pediatrics, effect of congenital heart disease on [LeDez, Strong, Reider, Burrows & Lerman], A71

**kinetics**

bupivacaine, after short and long term infusions, in conscious dogs [Mazoit, Lambert, Froidevaux, Gerard & Berdeaux], A274

bupivacaine, during axillary brachial plexus block in renal failure [Chauvin, Mazoit, Andrivon, Goeau & Duvaldestin], A261

teaching tool for, personal computer spreadsheet [Pinchak], A224

lidocaine, after epidural administration, influence of hepatic blood flow on [Saada, Bonnet, Piraube, Benoit & Rey], A251

methadone, in children and adolescents in perioperative period [Berde, Sethna, Holzman, Reidy & Gondek], A519

metocurine, in infants, children, and adults [Weinstein, Matteo, Ornstein, Goldstoft & Diaz], A615

midazolam, in anesthetized cirrhotic patients [Chauvin, Haberer, Ferrier, Trouvin, Farinotti & Duvaldestin], A290

**models**

personal computer spreadsheet [Pinchak], A224

during nitroprusside infusion, comparison of left atrial and systemic venous administration [Jaffe & Kien], A35

pediatric rectal methohexitone induction with and without rectal suctioning after sleep [Kestin, McIlvaine, Lockhart, Kestin & Jones], A493

pipecuronium, in CABG patients [Wierda, Karliczek, van den Brom, Kersten-Kleef & Agoston], A613

pipecuronium, influence of renal failure on [Caldwell, Canfell, Castagnoli, Lynam, Fahey, Fisher & Miller], A612

pipecuronium and pancuronium [Caldwell, Castagnoli, Canfell, Fahey, Lynam, Fisher & Miller], A611

prolonged elimination of midazolam in patients recovering from cardiac surgery [Maitre, Funk & Crevoisier], A655

propofol administered by prolonged continuous intravenous infusion in man [Albanese, Aufray, Lacarelle, Martin & Gouin], A667

propofol infusions [Shafer, Shafer, Doze & White], A668

serum protein binding and cardiotoxicity of bupivacaine and mepivacaine [Santos, Pedersen, Finster, Morishima & Arthur], A249

sufentanil, in elderly [Spielvogel, Caron, Levron & Lienhart], A389

thiopental, age and, reassessment of [Krejcie, Henthorn, Avram & Morton], A664

**uptake**

maternal and fetal, of bupivacaine vs. lidocaine, at steady state plasma drug concentrations [Morishima, Pedersen, Santos, Finster & Covino], A437

via bubble oxygenators [Nussmeier, Moskowitz, Weiskopf, Cohen & Eger II], A197

volume of distribution in patients with gram-negative sepsis in ICU [Mitchell, Wilson, Dodek & Russell], A126

**Pharmacology****acetylcholine**

blood levels during hypothermic cardiopulmonary bypass [Mantz, Marty, Blanchot, Trouvin, Farinotti & Desmots], A13

**adenosine**

hypotension induced with, regional cerebral blood flow in rats and [Monk, Sperry, Durieux, Walker & Longnecker], A577

increased production of, by heart, during acute coronary occlusion in man [Bardenheuer, Hofling, Fabry & Peter], A311

and regional cerebral blood flows during deliberate hypotension complicated by hemorrhage [Sperry, Monk, Durieux, Walker & Longnecker], A575

regional hemodynamic effects of induced hypotension with [Monk, Sperry, Durieux, Walker & Longnecker], A34

**alinidine**

antitachycardic effects in patients after open heart surgery [Spiss, Rosenits, Haslinger, Redl & Haider], A44

**almitrine bismesylate**

low-dose, enhancement of hypoxic pulmonary vasoconstriction with, during canine one-lung hypoxia [Chen, Miller, Clarke, Clergue, Marshall & Marshall], A548

**aminoglycosides**

volume of distribution in patients with gram-negative sepsis in ICU [Mitchell, Wilson, Dodek & Russell], A126

**amrinone**

differential attenuation of anesthetic-induced myocardial depression in vitro following isoflurane, but not halothane, anesthesia [Neal, Wolf & Mathew], A91

dobutamine and, combined cardiovascular effects of [Sciolaro, Carrier, Emery, Cork, Gallo, Barkenbush, Perrotta & Copeland], A42

inotropism and, in vivo, end-systolic pressure-volume relationships in assessment of [Grayson, Marino, Yaster, Weiss & Kass], A600

milrinone with, vs. nitroprusside, during enflurane anesthesia in dog [Makela & Kapur], A601

pharmacokinetics in infants [Lawless, Burckart, Thompson & Siewers], A145

thrombocytopenia associated with, short-term administration and [Hines & Barash], A599

**azathioprine**

fails to alter dose-response curve of *d*-tubocurarine [Glidden, Jeevendra Martyn & Tomera], A357

**captopril**

effect on tachyphylaxis to sodium nitroprusside [Stead, Bloor, Van Etten & Flacke], A37

**carbamazepine**

resistance to vecuronium in patients receiving [Bulkley, Ebrahim, Roth, DeBoer & Run], A345

**clonidine**

antitachycardic effects in patients after open heart surgery [Spiss, Rosenits, Haslinger, Redl & Haider], A44

epidural, effects of, in pregnant ewes [Eisenach, Rose, Dewan & Grice], A448

epidural, hemodynamic and spinal cord blood flow effects of, in sheep [Grice & Eisenach], A219

intrathecal, microdose, morphine and, for postoperative analgesia [Coombs, Jensen & Murphy], A238

intravenous, fetal hypoxemia produced by [Eisenach, Rose, Dewan & Grice], A449

intravenous, hypoxemia produced by [Eisenach], A49

- and MAC for isoflurane in dogs [Maze, Vickery, Merlone & Gaba], A374
- and potentiation of morphine [Sperry, DiFazio & Moscicki], A391
- reduction of ADH response and dose requirement during nitroprusside induced hypotension by [Ghignone, Quintin, Noe & Calvillo], A38
- subarachnoid, spinal blood flow effect of [Crosby & Russo], A417
- decomposition of sodium nitroprusside by blood components [Bates & Baker], A307
- dipyridamole**
  - isoflurane vs., effects on myocardium supplied by chronically narrowed artery and, in dog [Zimpfer, Mayer & Steinber-eithner], A587
- dobutamine**
  - amrinone and, combined cardiovascular effects of [Sciolaro, Carrier, Emery, Cork, Gallo, Barkenbush, Perrotta & Copeland], A42
  - effects on systolic and diastolic coronary bypass graft flow in humans [Beloucif, Payen, Laborde, Bousseau & Echter], A40
  - peripheral effects of, in postoperative low-cardiac-output state [Cork, Gallo Jr., Levinson, Smith & Copeland], A41
- dose-response curves**
  - BW A938U, in children [Goudsouzian, Alifimoff, Liu, Embree, McNulty & Foster], A366
  - d*-tubocurarine, azathioprine fails to alter [Glidden, Jeevendra Martyn & Tomera], A357
  - pipecuronium bromide, in elderly, under balanced anesthesia [Azad, Goldberg, Larijani, Ritter, Marr, Beach & Seltzer], A370
  - succinylcholine, single vs. cumulative techniques [Smith, Donati & Bevan], A358
  - for vecuronium, on human diaphragm [Chauvin, Lebrault & Duvaldestin], A348
- Fenoldopam**
  - renal vasodilating infusions of, influence on hemodynamic response of inhalation anesthetics in rat [Ebling, Nunez & Field], A101
- in vitro cyanide release from sodium nitroprusside in different intravenous solutions [Ikeda, Schweiss, Frank & Homan], A308
- milrinone**
  - with amrinone or nitroprusside during enflurane anesthesia in dog [Makela & Kapur], A601
- superoxide dismutase**
  - effects on neurologic injury following global cerebral ischemia [Snelling, Ackerman, Dean, North & Traystman], A153
- Phenobarbital**, *See under* Induction, enzymes
- Phenylephrine**, *See under* Sympathetic nervous system, sympathomimetic agents
- Phenytoin**, *See under* Anticonvulsants
- Phosphorus-31** nuclear magnetic resonance, *See under* Measurement techniques, nuclear magnetic resonance
- Physostigmine**, *See under* Antagonists, benzodiazepine
- Pipecuronium**, *See under* Neuromuscular relaxants
- Placenta**, *See also* Anesthesia, obstetric; **Pregnancy**
  - esmolol in gravid ewe, transplacental passage and hemodynamic effects of [Ostman, Chestnut, Robillard, Weiner & Herrig], A635
  - propofol during cesarean section, placental transfer of [Dailland, Lirzin, Cockshott, Jorrot & Conseiller], A454
- Plasma atrial natriuretic factor**, *See under* Polypeptides
- Platelets**, *See under* Blood
- Pneumonia**, *See under* Complications
- Polypeptides**
  - angiotensin
    - concentrations during anesthesia in rat [Hoffman, Phillips & Kimura], A320
  - captopril
    - effect on tachyphylaxis to sodium nitroprusside [Stead, Bloor, Van Etten & Flacke], A37
- endorphins**
  - effects of oxymorphone or fentanyl on plasma concentrations of [Falumy, Bottros, Charchaflich, Sunder & Carr], A395
  - release of  $\beta$ -endorphin by epidural morphine [Donnenfeld, Ramanathan, Parker, Vargas & Turndorf], A446
- enkephalins**
  - secretion of, in cats [Gaumann, Yaksh, Tyce & Lucas], A677
- plasma atrial natriuretic factor**
  - concentrations during anesthesia in rat [Hoffman, Phillips & Kimura], A320
  - control of circulatory volume and sodium excretion during cardiac surgery by [Wood, Bullington, Hammon, Imada & Inagami], A18
  - and renal effects of PEEP ventilation [Kharasch, Yeo, Laposky, Kenny & Buffington], A330
- renin**
  - enflurane alters compensatory humoral and hemodynamic responses to hemorrhage [Zimpfer, Mayer, Kotai & Placheta], A53
  - resistance to hypotensive action of isoflurane not due to increase in plasma activity of [Bernard, Pinaud, Remi & Souron], A381
  - role in postcarotid endarterectomy hypertension [Goldberg, Seltzer, Azad, Smullens, Marr & Larijani], A569
- substance P**
  - release of, from cultured dorsal root ganglia, inhibition of, by opioids [Chang, Berde, Holz, Steward & Kream], A388
- Position**
  - effects**
    - cardiovascular**
      - changes associated with anesthesia and surgery in nephrectomy position [Rich, Weissman & Triner], A69
      - incidence of dysrhythmias during pulmonary artery catheterization and [Keusch, Winters & Thys], A184
    - ventilatory**
      - supine and lateral decubitus positions in anesthetized children [Larsson, Jonmarker, Lindahl & Werner], A499
  - nerve damage**
    - brachial plexus injury and musculoskeletal complaints after cardiac surgery, influence of internal mammary artery dissection and left arm position on [Roy, Charlton & Stafford], A167
- Positive end-expiratory pressure**, *See under* Ventilation
- Positron emission tomography**, *See under* Measurement techniques, tomography
- Postoperative analgesia**, *See under* Analgesia
- Postspinal headache**, *See under* Complications, headache
- Potassium**, *See under* Ions
- Potency, anesthetic**
  - age factors
    - sevoflurane in newborn swine and [Callaghan, Burrows, Miyasaka, Volgyesi & Lerman], A503
- MAC**
  - of co-administered halothane and isoflurane, in rat [Skeehan, Larach, Hensley Jr., Schuler & Derr], A379
  - determination of, comparison of ulnar nerve tetanic stimulation and clamping of anterior axillary fold to surgical incision for [Schultz, Katz & Pavlin], A669
  - isoflurane, awake, not affected by analgesic doses of morphine [Gross & Alexander], A375
  - isoflurane, in dogs, profoundly reduced by azepexole [Maze, Vickery, Merlone & Gaba], A374
  - of isoflurane, in rat, intrathecal morphine reduces [Drasner, Bernards & Ciriales], A670

- of sevoflurane, in humans and New Zealand white rabbit [Scheller, Partridge & Saidman], A373
  - sevoflurane in newborn swine and [Gallagher, Burrows, Miyasaka, Volgyesi & Lerman], A503
  - phosphoinositide analysis in rats with altered volatile anesthetic sensitivity [Haycock & Evers], A378
  - of secondary alcohol stereoisomers [Firestone, Alifimoff & Miller], A380
  - Pregnancy**
    - chronotropic effect of isoproterenol is reduced during [DeSimone, Leighton, Norris, Chayen & Menduke], A460
    - comparison of noninvasive hemodynamic measurements obtained by thoracic electrical bioimpedance between third trimester preeclamptic and normal pregnant patients [Ellis, Reese & Blass], A634
    - effect of vasopressor agents on uterine artery blood flow velocity in normovolemic guinea pig subjected to ritodrine infusion during [Chestnut, Ostman, Weiner, Hdez & Wang], A459
    - effects of epidural clonidine in, in ewes [Eisenach, Rose, Dewan & Grice], A448
    - hypertension induced by, ewe model of [Joyce, Longmire, Tessem, Baker & Jones], A455
    - visceral pain in, in rats, failure of intrathecal nalbuphine to suppress [Marando, Sinatra, Fu & Collins], A447
  - Premedication, See also Analgesics; Hypnotics**
    - antiemetic efficacy of oral metoclopramide vs. intravenous droperidol for outpatient laparoscopic procedures [Pandit, Kothary & Pandit], A425
  - atropine**
    - oral, in infants [Miller & Friesen], A491
    - solution with meperidine and diazepam, vs. oral transmucosal fentanyl citrate, in children [Nelson, Streisand, Mulder, East & Stanley], A490
  - fentanyl citrate, oral transmucosal, effects on gastric volume and acidity in children of [Leiman, Walford, Rawal, Katz, Marcus, van Nieuwenhuyzen, Cronau & Stanley], A489
  - midazolam, intramuscular, outpatient [Shafer, Urquhart, Doze & White], A419
  - scopolamine**
    - effect on continuous oxygen saturation in cardiac patient prior to transport to operating room [Hensley Jr., Dodson, Larach, Martin & High], A4
    - effect on preoperative arterial oxygen saturation in children with congenital heart disease [De Bock, Petrilli, Davis & Motoyama], A492
  - Pressoreceptors, See under Receptors**
  - Progesterone, See under Hormones**
  - Propofol, See under Anesthetics, intravenous**
  - Propranolol, See under Heart; Sympathetic nervous system, sympatholytic agents**
  - Prostacyclin, See under Hormones, prostaglandins**
  - Prostaglandins, See under Hormones**
  - Protamine, See under Blood, coagulation**
  - Protein**
    - albumin**
      - synthesis of, halothane decreases [Franks, Kruskal, Kirsch, Beachy & Harrison], A294
    - binding**
      - of bupivacaine and mepivacaine [Santos, Pedersen, Finster, Morishima & Arthur], A249
      - plasma, of sufentanil, age effects on [Meistelman, Benhamou, Mahe, Levron, Mazoit, Ecoffey & Truffa-Bachi], A518
  - Pseudocholinesterase, See under Enzymes**
  - Psychologic responses**
    - anxiety**
      - does not correlated with silent preoperative myocardial ischemia [Wilton, Sachdev, Luckoff, Kirsh & Shea], A470
    - effect of detailed anesthesia consent form on [Leighton, Bauman, Seltzer & Menduke], A567
  - Pulmonary artery, See under Lung**
  - Pulmonary artery catheters, See under Equipment, catheters**
  - Pulmonary edema, See under Complications, edema**
  - Pulmonary hypertension, See under Blood pressure, hypertension**
  - Pulse monitor, See under Measurement techniques**
  - Pulse oximeter, See under Equipment**
  - Pulse oximetry, See under Monitoring**
  - Pyrexia, malignant, See under Hyperthermia**
  - Pyridostigmine, See under Antagonists, neuromuscular relaxants**
- R**
- Radioactive tracers, See under Measurement techniques**
  - Radionuclide angiocardiology, See under Monitoring, angiocardiology**
  - Ranitidine, See under Histamine, antagonists**
  - Receptors**
    - chemoreceptors**
      - evidence against central control of cerebral blood flow with hypoxia [Miyabe, Koehler, Jones Jr., Gurtner & Traystman], A84
    - pressoreceptors**
      - baroreceptors**
        - function of, is heart rate-blood pressure relationship a valid clinical index of [Koushanpour, Behnia, Sinclair & Chang], A76
  - Records, anesthesia**
    - automated system for, performance of voice recognition component of [Smith, Brien & Banke], A193
  - Recovery**
    - assessment of, test used for [Cashman, Power, Jones & Adams], A434
    - characteristics of, following propofol anesthesia, compared with thiopental-isoflurane [Doze, Shafer & White], A398
    - comparison of effects of isoflurane and thiopental on neurologic outcome following focal ischemia in primates [Milde, Milde, Lanier & Michenfelder], A579
    - effects of superoxide dismutase on neurologic injury following global cerebral ischemia [Snelling, Ackerman, Dean, North & Traystman], A153
    - from halothane anesthesia, RO 15-1788 effects on [Geller, Weinbrum, Halpern, Nevo & Rudick], A422
    - hemodynamic and hyperadrenergic response to, prevention of post carotid endarterectomy hypertension with IV nisoldipine and [Braz, Coriat, Bertrand, Cheour, Landau, Mouquet & Viars], A140
    - hypertension in [Shapiro, McCarthy, Litwack, Carroll, Murphy & Ivankovich], A45
    - intravenous nicardipine for treatment of postoperative hypertension [Casar, Pool, Chelly, Barton, Turlapaty & Laddu], A141
    - neurologic, cardiac resuscitability and, after clinically relevant cardiac arrest of 20 min with cardiopulmonary bypass vs. cardiopulmonary resuscitation, in dogs [Angelos, Reich, Safar, Stezoski & Houghton], A147
    - neurologic outcome following regional cerebral ischemia with methohexital, midazolam, and etomidate [Baugman, Hoffman, Miletich & Albrecht], A582
    - after pediatric strabismus surgery, emesis in, effect of preoperative oral droperidol on incidence of [Kaya, Nicolson, Betts, Cochran & Swedlow], A531
    - pulse oximetry and incidence of hypoxemia during [Buschman, Morris, Warren, Philip & Raemer], A481
    - survey of 3,244 consecutive admissions to, at university teaching hospital [Gewolb, Hines & Barash], A471
    - time course of hemoglobin desaturation during immediate postan-

- esthetic period in children [Motoyama, Borland & Mutich], A508
- transport during, in children, oxygen administration prevents hypoxemia during [Patel, Norden & Hannallah], A529
- vecuronium, effect of succinylcholine on, comparing orbicularis oculi and adductor pollicis muscle [Joseph & Beatie], A342
- vecuronium, high dose [Ginsberg, Glass, Shafron, Mace, Quill & Mardekian], A341
- vecuronium and atracurium, assessment of evoked acceleration response during [Werner, Jensen, Kirkegaard Nielsen & Viby-Mogensen], A344
- Rectal anesthesia, See under Anesthetic techniques**
- Reflex sympathetic dystrophy, See under Sympathetic nervous system**
- Reflexes**
- baroreflex**
- arterial, effects of age and anesthesia on, in infant swine [Palmisano, Coon, van Brederode & Kampine], A522
- control during carotid endarterectomy under epidural anesthesia [Bonnet, Touboul, Szekeley & Abhay], A263
- control of heart rate during fentanyl anesthesia in newborn infants [Murat, Levron & Saint-Maurice], A523
- effects of propofol on control of heart rate in humans [Samain, Marty, Gauzit, Bouyet, Couderc & Desmonts], A75
- is heart rate-blood pressure relationship a valid clinical index of [Koushanpour, Behnia, Sinclair & Chang], A76
- Regional anesthesia, See under Anesthetic techniques**
- Relaxants, See Neuromuscular relaxants**
- Renal complications, See under Complications**
- Renin, See under Polypeptides**
- Research**
- anesthesia simulation in actual operating room environment [Gaba & DeAnda], A467
- creation of pregnancy induced hypertension model in pregnant ewe [Joyce, Longmire, Tessem, Baker & Jones], A455
- use of simulation to reduce animal studies [Quinn, Smith, Masuzawa, Martin, Mandel & Hatakeyama], A215
- Residents, See under Education; Manpower**
- Respiration, See Ventilation**
- Respiratory depression, See under Complications**
- Respiratory distress syndrome, See under Lung**
- Respiratory quotient, See under Metabolism**
- Respiratory resistance, See under Lung**
- Ribose, See under Metabolism**
- Ritodrine, See under Sympathetic nervous system, beta-adrenergic receptors**
- RO 15-1788, See under Antagonists, benzodiazepine**
- RX77989, See under Analgesics, narcotic**

## S

- Sarcoplasmic reticulum, See under Muscle, skeletal**
- Sciatic nerve, See under Nerve**
- Scopolamine, See under Premedication**
- Seizures, See Complications, convulsions**
- Septic shock, See under Shock**
- Septicemia, See under Infection**
- Serotonin (5-hydroxytryptamine)**
- effects on lung metabolism [Watkins & Martin], A296
- Sevoflurane, See under Anesthetics, volatile**
- Shock**
- endotoxic**
- E. coli, canine, effect of verapamil on spleen in early stage of [Kimura, Hakoshima, Goto, Tomlinson, Krug & Arakawa], A128
- lung injury induced by, effects of beta-2 receptor agonist on [Sigurdsson, Mousawi & Christenson], A151

- in sheep, central venous hypertension worsens pulmonary edema formation following [Allen, Drake, Gabel & Laine], A125
- hemorrhagic, severe, high vs. low inflation pressures of MAST in [Riou, Barriot, Bodenat & Viars], A204
- septic**
- canine model of, hemodynamic effects of anesthesia in, comparative study of [Van der Linden, Gilbert, Engelman & Vincent], A413
- canine model of, peak systolic pressure-end systolic volume ratio correlates with changes in ejection fraction in [Hoffman, Natanson, Danner, MacVittie, Walker & Parrillo], A127
- human, norepinephrine for treatment of [Martin, Saux, Albanese, Bonneru & Gouin], A648
- Shunting, See under Ventilation**
- Skeletal muscle, See Muscle, skeletal**
- Sleep**
- deprivation of, and attenuation of hypercapnic ventilatory response in man [Ochiai, Motoyama, Winter & Walczak], A331
- pediatric rectal methohexitone induction with and without rectal suctioning after, pharmacokinetic and pharmacodynamic study of [Kestin, McIlvaine, Lockhart, Kestin & Jones], A493
- REM, disorders of breathing in, marked hypoxemia after gastroplasty due to [Knill, Moote, Rose & Skinner], A552
- Sodium, See under Ions**
- Somatosensory evoked potentials, See under Monitoring**
- Spectroscopy, mass, See Measurement techniques, mass spectroscopy**
- Spinal anesthesia, See under Anesthetic techniques**
- Spinal cord**
- blood flow**
- effects of epidural clonidine in sheep [Grice & Eisenach], A219
- effects of subarachnoid clonidine on [Crosby & Russo], A417
- dorsal horn ganglia**
- cultured, substance P release from, opioid inhibition of [Chang, Berde, Holz, Steward & Kream], A388
- injury**
- in rat, anesthesia protects against [Cole, Shapiro, Drummond & Zivin], A585
- synapses**
- pharmacodynamics of <sup>3</sup>H-morphine in rat, following intrathecal administration [Nishio, Kitabata, Murata, Sinatra & Collins], A394
- Spiradoline, See under Analgesics, narcotic**
- Spontaneous ventilation, See under Ventilation**
- Steroids, See under Anesthetics, intravenous**
- Stomach, See under Gastrointestinal tract**
- Stored blood, See under Transfusion**
- Subarachnoid anesthesia, See Anesthetic techniques, spinal**
- Subarachnoid space, See under Anatomy**
- Substance P, See under Polypeptides**
- Succinylcholine, See under Neuromuscular relaxants**
- Sufentanil, See under Analgesics, narcotic; Anesthetics, intravenous**
- Superoxide dismutase, See under Pharmacology**
- Surfactant, See under Lung**
- Surgery**
- abdominal**
- anesthesia and, risk of, 1979 and 1983 [Lichtor, Roizen & Lane], A465
- diaphragmatic activity after, effects of thoracic extradural block on [Pansard, Philip, Bahnini, Brichant, Delima, Mankikian & Viars], A537
- pattern of breathing after, role of abdominal muscles in [Raimbault, Dureuil, Veber & Desmonts], A536
- transhiatal esophagus resection, hemodynamic changes associated with [Yakoubian, Bougeois, Marty, Marmuse & Desmonts], A119

**aneurysm**

- postoperative hypertension following [Domino & Cullen], A573
- cardiac**
  - anesthesia and, risk of, 1979 and 1983 [Lichter, Roizen & Lane], A465
  - brachial plexus injury and musculoskeletal complaints after, influence of internal mammary artery dissection and left arm position on [Roy, Charlton & Stafford], A167
  - children undergoing, caudal morphine for pain control following [Rosen, Rosen & Bank], A510
  - end-tidal carbon dioxide measurements in infants after [Wessel, Boyd III & Hickey], A175
  - monitoring of cardiac output by pulsed Doppler aortic implantable microprobes after [Fratacci, Laborde, Dupuy, Grec & Payen], A637
  - in neonates, randomized trial of high-dose sufentanil anesthesia in, hormonal and hemodynamic stress responses in [Anand, Carr & Hickey], A501
  - in neonates, randomized trial of high-dose sufentanil anesthesia in, metabolic stress response in [Anand & Hickey], A502
  - outcome after, choice of anesthetic agent and [Tuman, McCarthy & Ivankovich], A597
  - previous, effect on esophageal pacing current thresholds in patients undergoing coronary artery bypass grafting [Buchanan, Clements, Reves, Hochman & Kates], A17
  - prolonged elimination of midazolam in patients recovering from [Maitre, Funk & Crevoisier], A655

**cardiopulmonary bypass**

- antitachycardic effects of alinidine in patients after [Spiss, Rosenits, Haslinger, Redl & Haider], A44
- carbon dioxide elimination during, in infants and children [Larach, Hensley, High, Williams & Snider], A19
- cardiopulmonary resuscitation vs., cardiac resuscitability and neurologic recovery after clinically relevant cardiac arrest of 20 min with [Angelos, Reich, Safar, Stezoski & Houghton], A147
- control of circulatory volume and sodium excretion by atrial natriuretic factor during [Wood, Bullington, Hammon, Imada & Inagami], A18
- effects of dobutamine on systolic and diastolic coronary bypass graft flow in humans [Beloucif, Payen, Laborde, Bousseau & Echter], A40
- effects of previous cardiac surgery on esophageal pacing current thresholds in patients undergoing [Buchanan, Clements, Reves, Hochman & Kates], A17
- efficacy of noninvasive transcutaneous cardiac pacing in patients undergoing [Kelly, Royster & Angert], A16
- enzyme marker of renal damage and [Suntay, Howie, McSweeney, Galbraith & Smith], A15
- hypothermic, acebutolol blood levels during [Mantz, Marty, Blanchot, Trouvin, Farinotti & Desmonts], A13
- hypothermic, adequate anticoagulation determined independently by activated coagulation time during [Haddon, Gravlee, Bean, Miller & Angert], A26
- hypothermic, cerebrovascular responsiveness to PaO<sub>2</sub> is preserved during [Rogers, Stump, Prough, Angert & Wallenhaupt], A12
- hypothermic, effect of age on cerebral blood flow autoregulation during [Brusino, Reves, Prough, Stump & Croughwell], A10
- hypothermic, effects of pump flow reduction on cerebral blood flow during [Prough, Stump, Rogers, Phipps & Hinshelwood], A11
- influence of perfusion flow rates on cerebral blood flow and oxygen consumption during [Murkin, Farrar, Cleland, MacDonald & Mayer], A9

- membrane oxygenator vs. bubble oxygenator during [Hakoshima, Goto, Abe, Benson, Moran & Arakawa], A21
- neuropsychologic dysfunction after [Nussmeier & Fish], A14
- predictors of left ventricular function and mortality after [Ossey, Hawkins, Reves & McIntyre], A596
- prolonged PT and PTT despite adequate heparin neutralization following, in children [Oh, Bell & Hughes], A22
- silent myocardial ischemia before, in patients with unstable angina [Metzler, Gombotz, List & Rehak], A3
- thrombelastograph and Sonoclot signature monitoring of changes in blood coagulation following [Newland, Chapin, Hurlbert, Kennedy & Newland], A199
- use of thrombelastograph to predict and assess management of excessive bleeding after [Logas, Spiess, Hughes, McCarthy, Jaimovich & Ivankovich], A142

**cardiovascular**

- aortic, abdominal, dipyridamole thallium imaging in prediction of cardiac risk in [Bertrand, Godet, Baron, Coriat, Mundler, Fauchet & Viars], A117
- aortic, thoracic cross-clamping, isoflurane vs. sodium nitropruside to control hypertension during [Godet, Bertrand, Hag, Coriat, Cheour, Kieffer & Viars], A118
- etomidate vs. thiopental anesthesia for elective cardioversion [Ford, Maze & Gaba], A143
- oxygenator, membrane vs. bubble [Hakoshima, Goto, Abe, Benson, Moran & Arakawa], A21

**carotid endarterectomy**

- cerebral blood flow during [Young, Prohovnik, Correll, Wang & Lucas], A416
- hypertension following, prevention of, with IV nisoldipine, hemodynamic and hyperadrenergic response to recovery [Braz, Coriat, Bertrand, Cheour, Landau, Mouquet & Viars], A140
- hypertension following, role of epinephrine, norepinephrine and renin and treatment with labetalol in [Goldberg, Seltzer, Azad, Smullens, Marr & Larijani], A569
- under epidural anesthesia, baroreflex control during [Bonnet, Touboul, Szekely & Abhay], A263

**coronary artery bypass**

- effect of previous cardiac surgery on esophageal pacing current thresholds in patients undergoing [Buchanan, Clements, Reves, Hochman & Kates], A17
- effects of dobutamine on systolic and diastolic flow in humans [Beloucif, Payen, Laborde, Bousseau & Echter], A40
- intravenous labetalol for blood pressure reduction following [Prough, Mills, Kiger & Bowton], A136
- oxygen sufentanil anesthesia with, hemodynamic effects of BW A938U in patients undergoing [Stoops, Curtis, Kovach, McCammon, Stoelting & Warren], A368
- pharmacokinetics and cardiovascular effects of pipecuronium bromide in patients undergoing [Wierda, Karliczek, van den Brom, Kersten-Kleef & Agoston], A613
- pressure-rate ratio and diastolic time during, prediction of myocardial ischemia by [Shiraki, Hong, Jo, Strom, Goldiner & Oka], A595
- risk in patients following [Khambatta, Sonntag, Larsen, Stephan, Stone & Kettler], A598

**craniotomy**

- hemodynamic response to, under general anesthesia, effect of bupivacaine scalp infiltration on [Rung, Hillman, Thompson & Davis], A432

**laparoscopy**

- absorption of insufflation gas during, hazard of [de Sousa & Tyler], A476
- outpatient, antiemetic efficacy of oral metoclopramide vs. intravenous droperidol for [Pandit, Kothary & Pandit], A425

- outpatient, diagnostic, fentanyl vs. isoflurane in [Lecky, Kitz, Andrews, Young & Conahan], A433
- liver transplantation**
- autotransfusion during [Kang, Virji, Lewis, Aggarwal, Freeman & Fortunato], A83
- in children, intraoperative changes in coagulation during [Kang, Borland, Picone & Martin], A525
- impact on anesthesia personnel and services of programs for [Spiess, Narbone, McCarthy, Rettke & Ivankovich], A568
- mechanism of myocardial dysfunction during, role of isolated right ventricular failure in [Ellis, Lichtor, Chung, Polk, Emond, Broelsch, Thistlethwaite, Feinstein & Roizen], A82
- prognostic significance of blood glucose levels during [Mallett, Kang, Freeman, Aggarwal, Gasior & Fortunato], A313
- neurosurgery**
- anesthesia and, risk of 1979 and 1983 [Lichtor, Roizen & Lane], A465
- electrocardiographic changes following [Morales Jr., Shapiro, Donegan, Bird, Huycke, Rupp, Wickersham & Rampil], A65
- intracranial aneurysm clipping, postoperative hypertension following [Domino & Cullen], A573
- intracranial tumors cause abnormal cerebral blood flow responses to vasomotor stimuli [Stump, Bertels & Prough], A415
- orthopedic**
- foot, combined interosseous tibial nerve and common peroneal nerve blocks for [Shulman, Peng, Nyunt, Kepes & Blancato], A288
- hip arthroplasty, in elderly patients, comparison of sufentanil and fentanyl with N<sub>2</sub>O halothane anesthesia for [Gauzit, Marty, Couderc, Bouyet, Flaischler & Desmots], A120
- hip replacement, cardiovascular reactions due to histamine release during [Tryba, Thole & Wruck], A68
- hip replacement, cemented, oxygen desaturation during [Rosenberg, Bernstein, Bernstein & Ramanathan], A551
- knee replacement, hemodynamic changes during [Tartiere, Gerard, Samii & Quesnel], A106
- spinal, hyponatremia following [Shibutani, Komatsu, Taddonio & Lees], A157
- pediatric**
- cardiopulmonary bypass, carbon dioxide elimination during [Larach, Hensley, High, Williams & Snider], A19
- cardiopulmonary bypass, prolonged PT and PTT despite adequate heparin neutralization following [Oh, Bell & Hughes], A22
- thoracic**
- comparison of high frequency jet ventilation with conventional ventilation for bronchopleural fistula in acute respiratory failure [Bishop, Benson, Sato & Pierson], A116
- intrapleural administration of lidocaine for treatment of pain after [Carli, Mazoit, Zetlaoui & Lambert], A241
- prevention of respiratory depression from epidural morphine with nalbuphine hydrochloride following [Doran, Baxter, Samson, Penning & Dube], A248
- transplantation**
- rapid, bedside, and noninvasive assessment of brain death for [Lamer, Pilorget, Payen, Beloucif, Moreau & Echter], A148
- urologic**
- lithotripsy**
- extracorporeal shock wave, epidural anesthesia and, neurologic complications after [Korbon, Lander, Jenkins, Lippert & Carey], A228
- extracorporeal shock wave, epidural anesthesia and, pathologic effects on epidural space of [Lander, Korbon, Monk, Arnold, Jenkins, Langley & Williamson], A227
- extracorporeal shock wave, epidural bupivacaine and fentanyl analgesia for [Bromage, Al-Faqih, Kadiwal & Tamilarasan], A226
- extracorporeal shock wave, epidural bupivacaine and methadone analgesia for [Drenger, Shir, Magora & Davidson], A217
- extracorporeal shock wave, epidural fentanyl for [Pandit, Powell, Crider, McLaren & Rutter], A225
- vascular**
- anesthesia and, risk of, 1979 and 1983 [Lichtor, Roizen & Lane], A465
- comparison of isoflurane and sodium nitroprusside when used to control hypertension during [Godet, Bertrand, Hag, Coriat, Cheour, Kieffer & Viars], A118
- continuous lumbar epidural fentanyl for postoperative pain relief in [Bell, Levette & Larijani], A234
- dipyridamole thallium imaging in prediction of cardiac risk in patients scheduled for [Bertrand, Godet, Baron, Coriat, Mundler, Fauchet & Viars], A17
- effect of peripheral vascular disease on accuracy of noninvasive, continuous blood pressure measurement from finger [East, Pace, Sorenson, East & Westenskow], A186
- is increased operative stress associated with worse outcome? [Roizen, Lampe, Benefiel, Sohn, Lichtor, Smith, Stoney, Ehrenfeld, Goldstone, Reilly, Thisted, Eger II & Hamilton], A1
- Sympathetic block, See Anesthetic techniques, regional**
- Sympathetic nervous system**
- activity during hypercapnia and hypercapnic hypoxia in dogs [Hoka, Arimura, Bosnjak & Kampine], A105
- adrenal medulla**
- vasculature of, adrenergic receptors of [Jordan, Breslow, Kubos & Traystman], A58
- alpha-adrenergic receptors**
- of adrenal medullary vasculature [Jordan, Breslow, Kubos & Traystman], A58
- mechanism of action in sensitization of heart by halothane [Hayaishi, Sumikawa, Tashiro & Yoshiya], A56
- time course and hemodynamic effects of bolus administration in anesthetized patients [Schwinn, Clements, Hawkins, Kates & Reves], A72
- beta-adrenergic blockade**
- adequacy of automated blood pressure cuffs with epinephrine test doses in patients with [Johnson, Hom & Mulroy], A187
- blood pressure response to epinephrine test dose in [Hom, Johnson & Mulroy], A268
- beta-adrenergic receptors**
- of adrenal medullary vasculature [Jordan, Breslow, Kubos & Traystman], A58
- effects on endotoxin-induced lung injury [Sigurdsson, Mousawi & Christenson], A151
- myocardial, density of, decreased by halothane in dogs as assessed by positron emission tomography [Maze, Marty, Seto, Crouzel, Valloise, Crouzel, Lancon & Syrota], A55
- ritodrine**
- effect of vasopressor agents on uterine artery blood flow velocity in normovolemic gravid guinea pig subjected to infusion of [Chestnut, Ostman, Weiner, Hdez & Wang], A459
- catecholamines**
- of adrenal medullary vasculature [Jordan, Breslow, Kubos & Traystman], A58
- effects of oxymorphone or fentanyl on plasma concentrations of [Fahmy, Bottros, Charchafieh, Sunder & Carr], A395
- efflux from perfused dog adrenals, pentazocine-induced [Fukumitsu, Sumikawa, Kinouchi & Yoshiya], A387

**epinephrine**

- bupivacaine with, for intercostal nerve blocks [Johnson, Mickler, Arthur, Rosenberg, Wilson & Covino], A257
- chemical stability of, in pH-adjusted solutions [Bonhomme, Benhamou, Martre & Preaux], A279
- effect of adrenergic stress response on myocardial tolerance of global ischemia during narcotic anesthesia [Hill, Pollard, Simone, Reves & Lowe], A73
- effect on duration of analgesia with epidural bupivacaine and fentanyl [Grice, Eisenach, Dewan & Weiner], A440
- effect on uterine artery blood flow velocity in normovolemic gravid guinea pig subjected to ritodrine infusion [Chestnut, Ostman, Weiner, Hdez & Wang], A459
- effects of propofol on activity in humans [Samain, Marty, Gauzit, Bouyet, Couderc & Desmonts], A75
- is increased operative stress associated with worse outcome? [Roizen, Lampe, Benefiel, Sohn, Lichtor, Smith, Stoney, Ehrenfeld, Goldstone, Reilly, Thisted, Eger II & Hamilton], A1
- levels of, do not correlate with silent preoperative myocardial ischemia [Wilton, Sachdev, Luckoff, Kirsh & Shea], A470
- local anesthetics containing, maternal hemodynamic responses to, in pre-eclampsia [Dror, Abboud, Moore, Gangolly, Zhu, Mantilla, Swart, Mosaad, Davis & Makar], A632
- oxidation rate of, effects of pH on [Parnass, Baughman, Miletič & Albrecht], A280
- phenylephrine vs., and cerebral and myocardial perfusion and somatosensory evoked potentials during and following CPR in dogs [Schleien, Koehler, Berkowitz, Dean, Gervais, Michael, Rogers & Traystman], A650
- role in postcarotid endarterectomy hypertension [Goldberg, Seltzer, Azad, Smullens, Marr & Larijani], A569
- safety and efficacy of 2% bisulfite-free chloroprocaine with and without, for epidural anesthesia in parturient [Abboud, Mosaad, Makar, Gangolly, Dror, Zhu, Mantilla, Davis, Moore & Swart], A631
- secretion of, in cats [Gaumann, Yaksh, Tyce & Lucas], A677
- stress response following reversal of benzodiazepine-induced sedation [White, Shafer, Boyle & Doze], A661
- stress response to local anesthesia for cataract surgery [Moss, Donlon Jr. & McGoldrick], A67

**norepinephrine**

- effect of adrenergic stress response on myocardial tolerance of global ischemia during narcotic anesthesia [Hill, Pollard, Simone, Reves & Lowe], A73
- effects of propofol on activity in humans [Samain, Marty, Gauzit, Bouyet, Couderc & Desmonts], A75
- is increased operative stress associated with worse outcome? [Roizen, Lampe, Benefiel, Sohn, Lichtor, Smith, Stoney, Ehrenfeld, Goldstone, Reilly, Thisted, Eger II & Hamilton], A1
- levels of, do not correlate with silent preoperative myocardial ischemia [Wilton, Sachdev, Luckoff, Kirsh & Shea], A470
- role in postcarotid endarterectomy hypertension [Goldberg, Seltzer, Azad, Smullens, Marr & Larijani], A569
- secretion of, in cats [Gaumann, Yaksh, Tyce & Lucas], A677
- stress response following reversal of benzodiazepine-induced sedation [White, Shafer, Boyle & Doze], A661
- stress response to local anesthesia for cataract surgery [Moss, Donlon Jr. & McGoldrick], A67
- for treatment of human hyperdynamic septic shock [Martin, Saux, Albanese, Bonneru & Gouin], A648

**dopamine**

- secretion of, in cats [Gaumann, Yaksh, Tyce & Lucas], A677
- pentobarbital disturbance of control of pulmonary circulation in

- conscious dogs [Goll, Nyhan, Clougherty, Chen & Murray], A547

**reflex sympathetic dystrophy**

- intravenous regional bretylium for treatment of [Ford, Forrest Jr. & Eltherington], A218

**sympatholytic agents****acebutolol**

- blood levels during hypothermic cardiopulmonary bypass [Mantz, Marty, Blanchot, Trouvin, Farinotti & Desmonts], A13

**bretylium**

- intravenous regional, treatment of reflex sympathetic dystrophy with [Ford, Forrest Jr. & Eltherington], A218
- droperidol abolishes acute thrombus formation in stenosed dog coronary arteries [Bertha, Sill, Nugent & Fols], A78

**esmolol**

- assessment of transplacental passage and hemodynamic effects of, in gravid ewe [Ostman, Chestnut, Robillard, Weiner & Herrig], A635
- bolus loading technique for treatment of intraoperative tachycardia and/or hypertension [Reves, Croughwell, Hawkins & Jacobs], A33
- for deliberate hypotension, randomized controlled trial of [Ornstein, Matteo, Weinstein & Schwartz], A423
- effect on cerebral blood flow during intracranial hypertension and hemorrhagic hypovolemia [Bunegin, Albin & Gelineau], A424

**labetalol**

- effect on hemodynamic response to intubation [Inada, Cullen, Nemeskal & Teplick], A31
- effects on beat-by-beat cardiovascular responses to rapid sequence induction in humans [Bernstein, Nelson, Ebert, Woods & Roerig], A32
- intravenous, for blood pressure reduction following myocardial revascularization [Prough, Mills, Kiger & Bowton], A136
- intravenous, preinduction, ablation of hemodynamic responses to tracheal intubation with [Leslie, Kalayjian, McLoughlin, Russell & Plachetka], A30
- role in postcarotid endarterectomy hypertension [Goldberg, Seltzer, Azad, Smullens, Marr & Larijani], A569

**propranolol**

- negative chronotropic actions of sufentanil and vecuronium in chronically instrumented dogs pretreated with [Schmeling, Kampine, Bernstein & Warltier], A90
- UL-FS 49 vs., hemodynamic effects of, in conscious and isoflurane-anesthetized chronically instrumented dogs [Warltier, Riley, Gross, Schmeling & Kampine], A48

**sympathomimetic agents**

- effects on endotoxin-induced lung injury [Sigurdsson, Mousawi & Christenson], A151

**ephedrine**

- effect on uterine artery blood flow velocity in normovolemic gravid guinea pig subjected to ritodrine infusion [Chestnut, Ostman, Weiner, Hdez & Wang], A459
- long term sterility of diluted or pre-drawn solutions of [Mayweather, Santos, Juneja & Stanek], A160

**isoproterenol**

- effects in porcine model of pulmonary hypertension [Priellip, Pearl, McLean & Rosenthal], A154
- peripheral effects in postoperative low-cardiac-output state [Cork, Gallo Jr., Levinson, Smith & Copeland], A43
- as safe and effective intravenous marker in laboring women [Leighton, DeSimone, Norris & Chayen], A626

**mephentermine**

- effect on uterine artery blood flow velocity in normovolemic

gravid guinea pig subjected to ritodrine infusion [Chestnut, Ostman, Weiner, Hdez & Wang], A459

**phenylephrine**  
effect on uterine artery blood flow velocity in normovolemic gravid guinea pig subjected to ritodrine infusion [Chestnut, Ostman, Weiner, Hdez & Wang], A459

epinephrine vs., and cerebral and myocardial perfusion and somatosensory evoked potentials during and following CPR in dogs [Schleien, Koehler, Berkowitz, Dean, Gervais, Michael, Rogers & Traystman], A650

time course and hemodynamic effects of  $\alpha_1$ -adrenergic bolus administration in anesthetized patients [Schwinn, Clements, Hawkins, Kates & Reves], A72

**Sympatholytic agents, See under Sympathetic nervous system**

**Sympathomimetic agents, See under Sympathetic nervous system**

**Synapses, See under Spinal cord**

## T

**Tachycardia, See under Heart, arrhythmia**

**Tachyphylaxis, See under Immune response**

**Teaching, See Education**

**Techniques, See Anesthetic techniques; Measurement techniques**

**Temperature, See also Hyperthermia; Hypothermia; Monitoring body**  
arterial PO<sub>2</sub> correction for, during hypothermia [Moon & Cam-poresi], A20  
effect of warm IV solutions on management of surgical hypother-mia [Papenburg, English, Foot, Farias & Hinchey], A479  
serum creatinine concentration and clearance during whole body hyperthermia ( $\geq 41.5^\circ\text{C}$ ) under general anesthesia [Cronau Jr., Mansfield & Bull], A306

**cooling**  
effect of warm IV solutions on management of surgical hypother-mia [Papenburg, English, Foot, Farias & Hinchey], A479

**heating**  
serum creatinine concentration and clearance during whole body hyperthermia ( $\geq 41.5^\circ\text{C}$ ) under general anesthesia [Cronau Jr., Mansfield & Bull], A306

**metabolism**  
serum creatinine concentration and clearance during whole body hyperthermia ( $\geq 41.5^\circ\text{C}$ ) under general anesthesia [Cronau Jr., Mansfield & Bull], A306

**operating room, See under Operating rooms**

**regulation**  
active, during isoflurane anesthesia [Sessler, Olofsson & Rubin-stein], A405  
in parturient, effect of epidural sufentanil on [Johnson, Sevarino, Lema, Datta, Ostheimer & Naulty], A450

**Tension, See Eyes, intraocular pressure; Oxygen**

**Teratogenicity, See under Toxicity**

**Tetanic stimulation, See Measurement techniques, neuromuscular blockade**

**Tetracaine, See under Anesthetics, local**

**Thermolulution cardiac output, See under Measurement techniques**

**Thermoregulation, See Temperature, regulation**

**Thiopental, See under Anesthetics, intravenous**

**Thoracic anesthesia, See under Anesthetic techniques, peridural**

**Thoracic surgery, See under Surgery**

**Thrombelastography, See under Measurement techniques**

**Thrombosis, See under Complications**

**Tibial nerve, See under Nerve**

**Tidal volume, See under Ventilation**

**Tomography, See under Measurement techniques**

**Topical anesthesia, See under Anesthetic techniques**

**Total parenteral nutrition, See Nutrition, parenteral**

**Toxicity, See also Shock, endotoxic**  
**hepatic**  
comparative, of halothane, isoflurane, and enflurane, using iso-lated perfused rat liver [Mathieu, Ford, Ray & Taylor], A302  
of halothane exposure, hypoxia, and phenobarbital induction in monolayers of rat hepatocytes [Schieble, Costa, Heffel & Trudell], A316  
during halothane or isoflurane anesthesia in guinea pigs [Gelman & Hursh], A301

**neurotoxicity**  
of Nesacaine-CE [Buffington & Powers], A256

nitrous oxide concentration delays human bone marrow engraft-ment [Hogan & Cypcar], A477

**renal**  
effects of fluoride ion on ischemic and non-ischemic canine kidney [Rice, Southard, Hjelmhaug & Belzer], A304

**teratogenicity**  
nitrous oxide, in rats, effects of halothane, isoflurane, and folinic acid on [Fujinaga, Baden, Yhap & Mazze], A456

**Trace anesthetics, See Anesthetics, gases, trace concentrations**

**Transesophageal echocardiography, See under Measurement tech-niques, echocardiography**

**Transfusion, See also Blood, replacement**  
**autotransfusion**  
biochemical, metabolic, and hematologic effects of intraoperative processing of CPDA-1 and AS-1 packed red cells [Belani & Estrin], A156  
effect on decreasing risk of homologous transfusion [Bernstein & Rosenberg], A478  
during liver transplantation [Kang, Virji, Lewis, Aggarwal, Free-man & Fortunato], A83

**stored blood**  
effect on decreasing risk of homologous transfusion [Bernstein & Rosenberg], A478

**Transplantation, See under Surgery, individual procedures; individ-ual organs**

**Trasylol, See Blood, anticoagulants, aprotinin**

**Trauma, See under Complications**

**Trinitrin, See Anesthetic techniques, hypotension, induced, nitro-glycerin**

**Tubes, See under Equipment**

**d-Tubocurarine, See under Neuromuscular relaxants**

## U

**Ulcers, See under Complications**

**UL-FS 49, See under Ions, calcium channel blockers**

**Ultrasound, See Measurement techniques, Doppler ultrasound**

**Uridine, See under Metabolism**

**Urologic anesthesia, See under Anesthesia**

**Urologic surgery, See under Surgery**

**Uterus, See also Anesthesia, obstetric; Placenta; Pregnancy**  
**blood flow**  
effect of vasopressor agents on, in normovolemic gravid guinea pig subjected to ritodrine infusion [Chestnut, Ostman, Weiner, Hdez & Wang], A459  
magnesium sulfate and [Suresh & Nelson], A636

## V

**Vaporizers, See under Equipment**

**Vascular pressures, See under Heart**

**Vascular resistance, See under Lung**

**Vascular surgery, See under Surgery**



**Vecuronium, See under Neuromuscular relaxants****Veins****cannulation**

in children, analgesic effects of eutectic mixture of local anesthetics vs. intradermal lidocaine infiltration prior to [Soliman, Broadman, Hannallah & McGill], A513

right internal jugular vs. left subclavian, complications from, comparison of [Neal, Wallfisch & Arens], A222

**compliance**

effect of verapamil on spleen in early stage of canine *E. coli* endotoxin shock [Kimura, Hakoshima, Goto, Tomlinson, Krug & Arakawa], A128

pulse-volume change in lower extremity with epidural blockade and lumbar sympathectomy [Park & Macnamara], A283

**vena cava**

superior, hypertension, pleural effusions can be caused by [Allen, Drake, Gabel & Laine], A138

**venous pressure**

central venous hypertension worsens pulmonary edema formation following endotoxemia in sheep [Allen, Drake, Gabel & Laine], A125

is CVP the appropriate downstream pressure in systemic vascular resistance calculations [Beattie, Stevenson, Maruschak, Rosenfeld & Watkins], A87

pleural effusions can be caused by superior vena caval hypertension [Allen, Drake, Gabel & Laine], A138

**Vena cava, See under Veins****Venous pressure, See under Veins****Ventilation****airway pressure**

transient analysis using ECG-triggered phrenic nerve stimulation [Peters, Kindred & Robotham], A81

**alveolar**

gas mixing dependence on pulmonary blood flow vs. cardiogenic oscillations [Brampton, Mackenzie, Moorman & Watson], A80

**anesthetics, effects of**

bupivacaine cervical epidural blockade [Chauvin, Lebrault, Gauneau, Goeau & Duvaldestin], A262

halothane vs. isoflurane and [Slavchenko, Sandler, Murphy, Vosu & Lau], A535

midazolam and flumazenil [Mora, Torjman & DiGiorgio], A534  
relationship of cisternal CSF morphine levels to changes in ventilation during intravenous or fourth cerebroventricular infusions of morphine sulfate in awake dog [Pelligrino, Peterson, Henderson & Albrecht], A553

reversal of morphine-induced respiratory depression during fourth ventricular administration of butorphanol or nalbuphine in awake dogs [VadeBoncouer, Pelligrino & Albrecht], A542

routine spinal or epidural, and rib cage distortion during spontaneous inspiration [Urney, Lambert, Concepcion, Brown & Leith], A538

sedative concentration of isoflurane and halothane in goat [Popic, Will & Jameson], A328

sedative doses of midazolam significantly depress hypoxic ventilatory drive in man [Alexander & Gross], A533

sensitivity to hypoxia after administration of agonist/antagonist [Camporesi, Glass, Moon, Steinhilber & Wagoner], A541

sufentanil infusion and responses to hypercapnia and hypoxia during isoflurane anesthesia in dogs [Abdul-Rasool, Aqleh, Jenkins, Valcke & Ward], A539

**apnea**

gas mixing during, at low lung volume [Mackenzie, Moorman, Smith, Gundry, Coughlin & Hankins], A540

inductance plethysmography monitors, computerized artifact rejection for [East, East, Waterfall, Mathews & Pace], A190

oxygenation in pediatric patients [Kernisan, Adler, Gibbons & Runions], A521

postanesthetic, in premature infants, prevention of, caffeine in [Welborn, de Soto, Hannallah, Fink & Boeckx], A507

threshold, in lambs, effect of age and halothane concentration on [Kurth, Hutchinson, Davenport & Caton], A520

**carbon dioxide response**

attenuated by sleep deprivation, in man [Ochiai, Motoyama, Winter & Walczak], A331

and mini-dose intrathecal morphine for relief of post-caesarean section pain [Abboud, Dror, Mossad, Zhu, Gangolly, Mantilla, Swart, Silao, Makar, Moore, Davis & Lee], A464

**carbon dioxide tension (gradients)**

effects of nitrous oxide during halothane or enflurane anesthesia in children [Murat, Chausain & Saint-Maurice], A498

**diaphragm**

transient analysis using ECG-triggered phrenic nerve stimulation [Peters, Kindred & Robotham], A81

**high frequency jet**

conventional ventilation vs., for bronchopleural fistula in acute respiratory failure [Bishop, Benson, Sato & Pierson], A116

with heliox [Cros, Guenard, Boudey & Erny], A201

vaporizer for inhalation anesthetics during [Mazloomdoost, Klain, Nemoto, Lin & Foon], A210

**mechanical**

automated sulfur hexafluoride washout FRC measurement system for [East, Bloem, Van Ark, Peng & Pace], A206

diagnosis of nosocomial pneumonia with, evaluation of new protected bronchial catheter for [Rossignon, Rouby, Belbachir, Nicolas, Martin de Lassale & Viars], A123

prevention of stress bleeding and risk of nosocomial pneumonia with [Tryba], A124

transient analysis using ECG-triggered phrenic nerve stimulation [Peters, Kindred & Robotham], A81

treatment of subarachnoid hemorrhage with nimodipine affects pulmonary gas exchange in patients requiring [Germann, Aloy, Zabloudil, Richling & Zimpfer], A115

**pattern**

after upper abdominal surgery, role of abdominal muscles in [Raimbault, Dureuil, Veber & Desmonts], A536

**perfusion (ventilation-perfusion)**

real-time continuous estimation of gas exchange by dual oximetry [Rasanen, Downs, DeHaven & Garner], A173

**position and, See Position, effects, ventilatory****positive end-expiratory pressure**

aggressive application produces increased morbidity and mortality [Carroll, Tuman, Braverman, Logas & Ivankovich], A114

atrial natriuretic peptide and renal effects of [Kharasch, Yeo, La-posky, Kenny & Buffington], A330

canine asymmetric pulmonary edema treated with, does hypothermia improve oxygen delivery in [Johnston, Vinten-Johansen, Strickland & Bowton], A155

effect of ischemia on relationship between pericardial pressure and right atrial pressure during [Biondi, Schulman, Matthay & Barash], A555

evaluation of efficacy of, in early postoperative acute respiratory failure [Ben Ammar, Rouby, Bodin, Rossignon, Rotcayg & Viars], A651

intraocular pressure and [Nimmagadda, Joseph, Salem, Villarreal & Lopez], A132

**shunting**

real-time continuous estimation of gas exchange by dual oximetry [Rasanen, Downs, DeHaven & Garner], A173

- spontaneous
  - automated sulfur hexafluoride washout FRC measurement system for [East, Bloem, Van Ark, Peng & Pace], A206
- tidal volume
  - absence of agonist or inverse agonists effects of overdose of RO 15-1788 [Forster, Crettenand & Morel], A144
  - effects of nitrous oxide during halothane or enflurane anesthesia in children [Murat, Chaussain & Saint-Maurice], A498
- Ventilation-perfusion, *See* Ventilation, perfusion
- Ventilators, *See under* Equipment
- Ventricular fibrillation, *See under* Heart, arrhythmia, fibrillation
- Ventricular function, *See under* Heart, function
- Verapamil, *See under* Ions, calcium channel blockers
- Vital capacity, *See under* Lung, capacity
- Volatile anesthetics, *See* Anesthetics, volatile
- Volume, tidal, *See under* Ventilation
- Vomiting
  - antiemetics
    - metoclopramide
      - oral, intravenous droperidol vs., for outpatient laparoscopic procedures [Pandit, Kothary & Pandit], A425
      - pretreatment with, does atropine inhibit effect of, in morbidly obese patient [Goldberg, Norris, Larijani, Marr & Seltzer], A289
- incidence
  - postoperative, after pediatric strabismus surgery, effect of preoperative oral droperidol on [Kaya, Nicolson, Betts, Cochran & Swedlow], A531
  - postoperative, in pediatric eye surgery, not affected by nitrous oxide [Gibbons, Davidson & Adler], A530
  - survey of 3,244 consecutive admissions to post-anesthesia recovery room at university teaching hospital [Gewolb, Hines & Barash], A471
- nausea
  - acupuncture in treatment of [Dundee, Fitzpatrick & Ghaly], A165
  - survey of 3,244 consecutive admissions to post-anesthesia recovery room at university teaching hospital [Gewolb, Hines & Barash], A471

X

- Xanthine dehydrogenase, *See under* Enzymes
- Xanthine oxidase, *See under* Enzymes
- X-rays, *See under* Complications, diagnosis
